# Supplementary material for: Methyl sydnone imine and its energetic salts
Source: Royal Society of Chemistry journal article supplement (doi:10.1039/d0nj05354f), 2021-01-01
Supplement: d0nj05354f1.pdf [file d0nj05354f1.pdf]

## New Journal of Chemistry

Supporting Information for:

### Methyl Sydnone Imine and Its Energetic Salts

Matthew L. Gettings,<sup>a,c,f</sup> Edward F. C. Byrd,<sup>d</sup> Matthias Zeller,<sup>e</sup> and Davin Piercey<sup>\*a,b,c</sup>

---

<sup>a</sup> Department of Materials Engineering, Purdue University, 205 Gates Road, West Lafayette, IN, 47906, USA. Email: [dpiercey@purdue.edu](mailto:dpiercey@purdue.edu)

<sup>b</sup> Department of Mechanical Engineering, Purdue University, 205 Gates Road, West Lafayette, IN, 47906, USA.

<sup>c</sup> Purdue Energetics Research Center, Purdue University, 205 Gates Road, West Lafayette, IN, 47906, USA.

<sup>d</sup> Detonation Sciences & Modeling Branch, CCDC U.S. Army Research Laboratory, Aberdeen Proving Ground, MD21005, USA.

<sup>e</sup> Department of Chemistry, Purdue University, 560 Oval Drive, West Lafayette, IN 47907, USA

<sup>f</sup> Department of Chemistry & Life Science, U.S. Military Academy, West Point, NY 10996, USA

#### Table of Contents

NMR Spectroscopy

IR Spectroscopy

DSC / TGA

X-ray Crystallographic Data

Compound 2: MSI nitrate

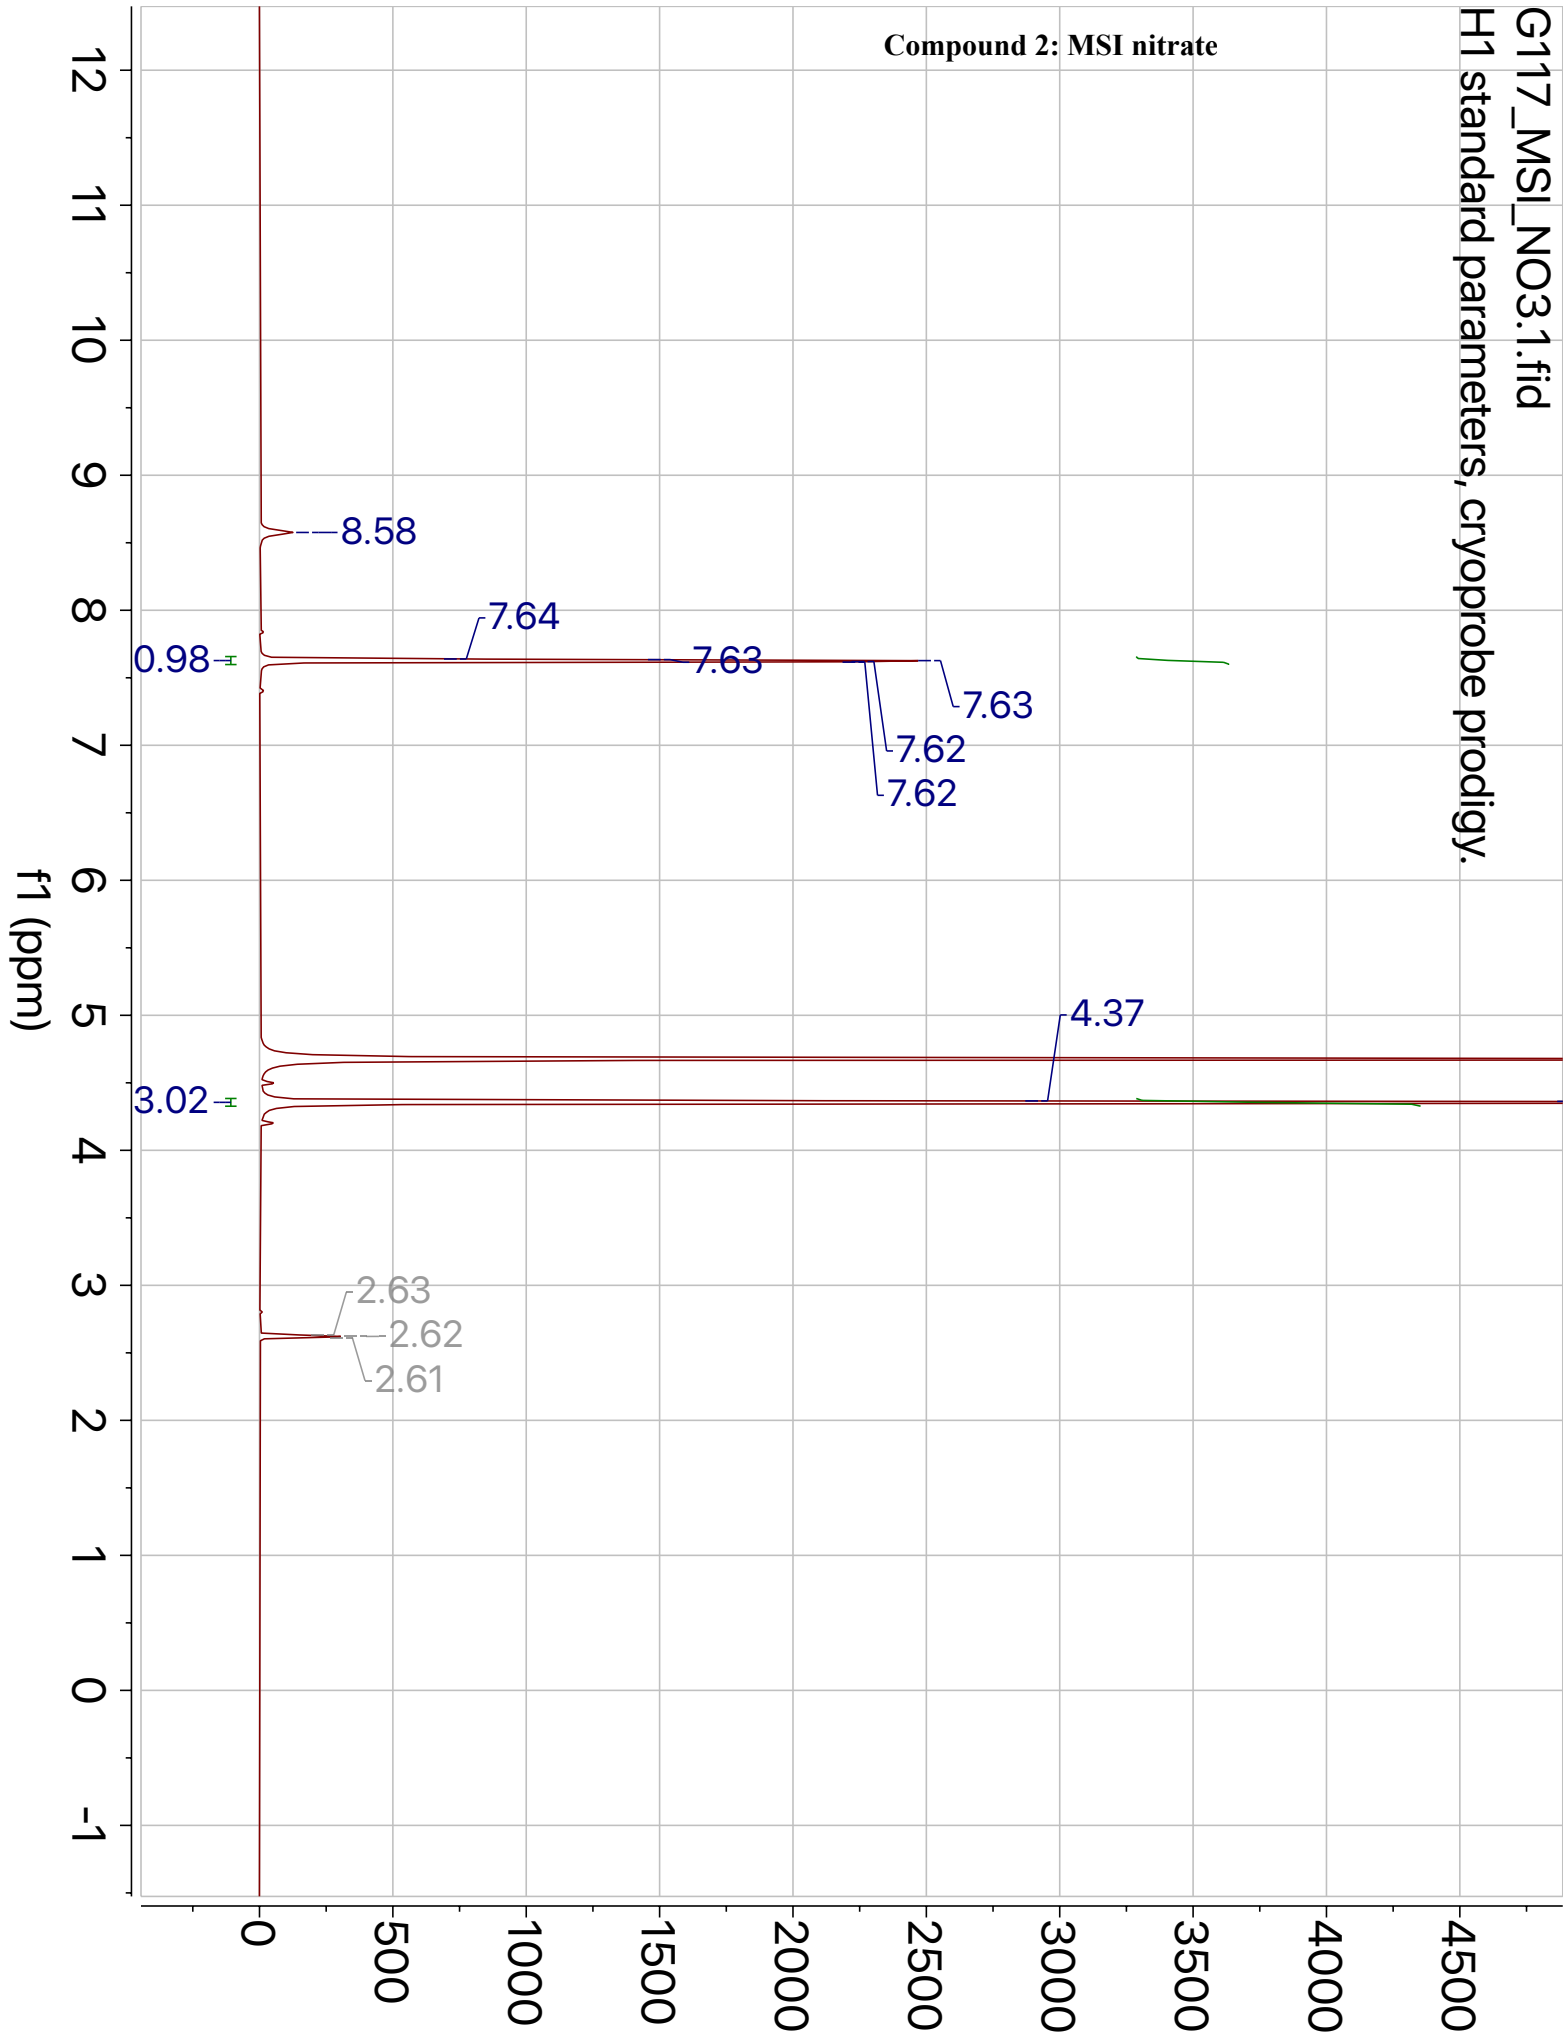

G117\_MSI\_NO3.2.fid

C13 standard parameters, cryoprobe prodigy. Pulprog = zgig30zr.jsh.

Compound 2: MSI nitrate

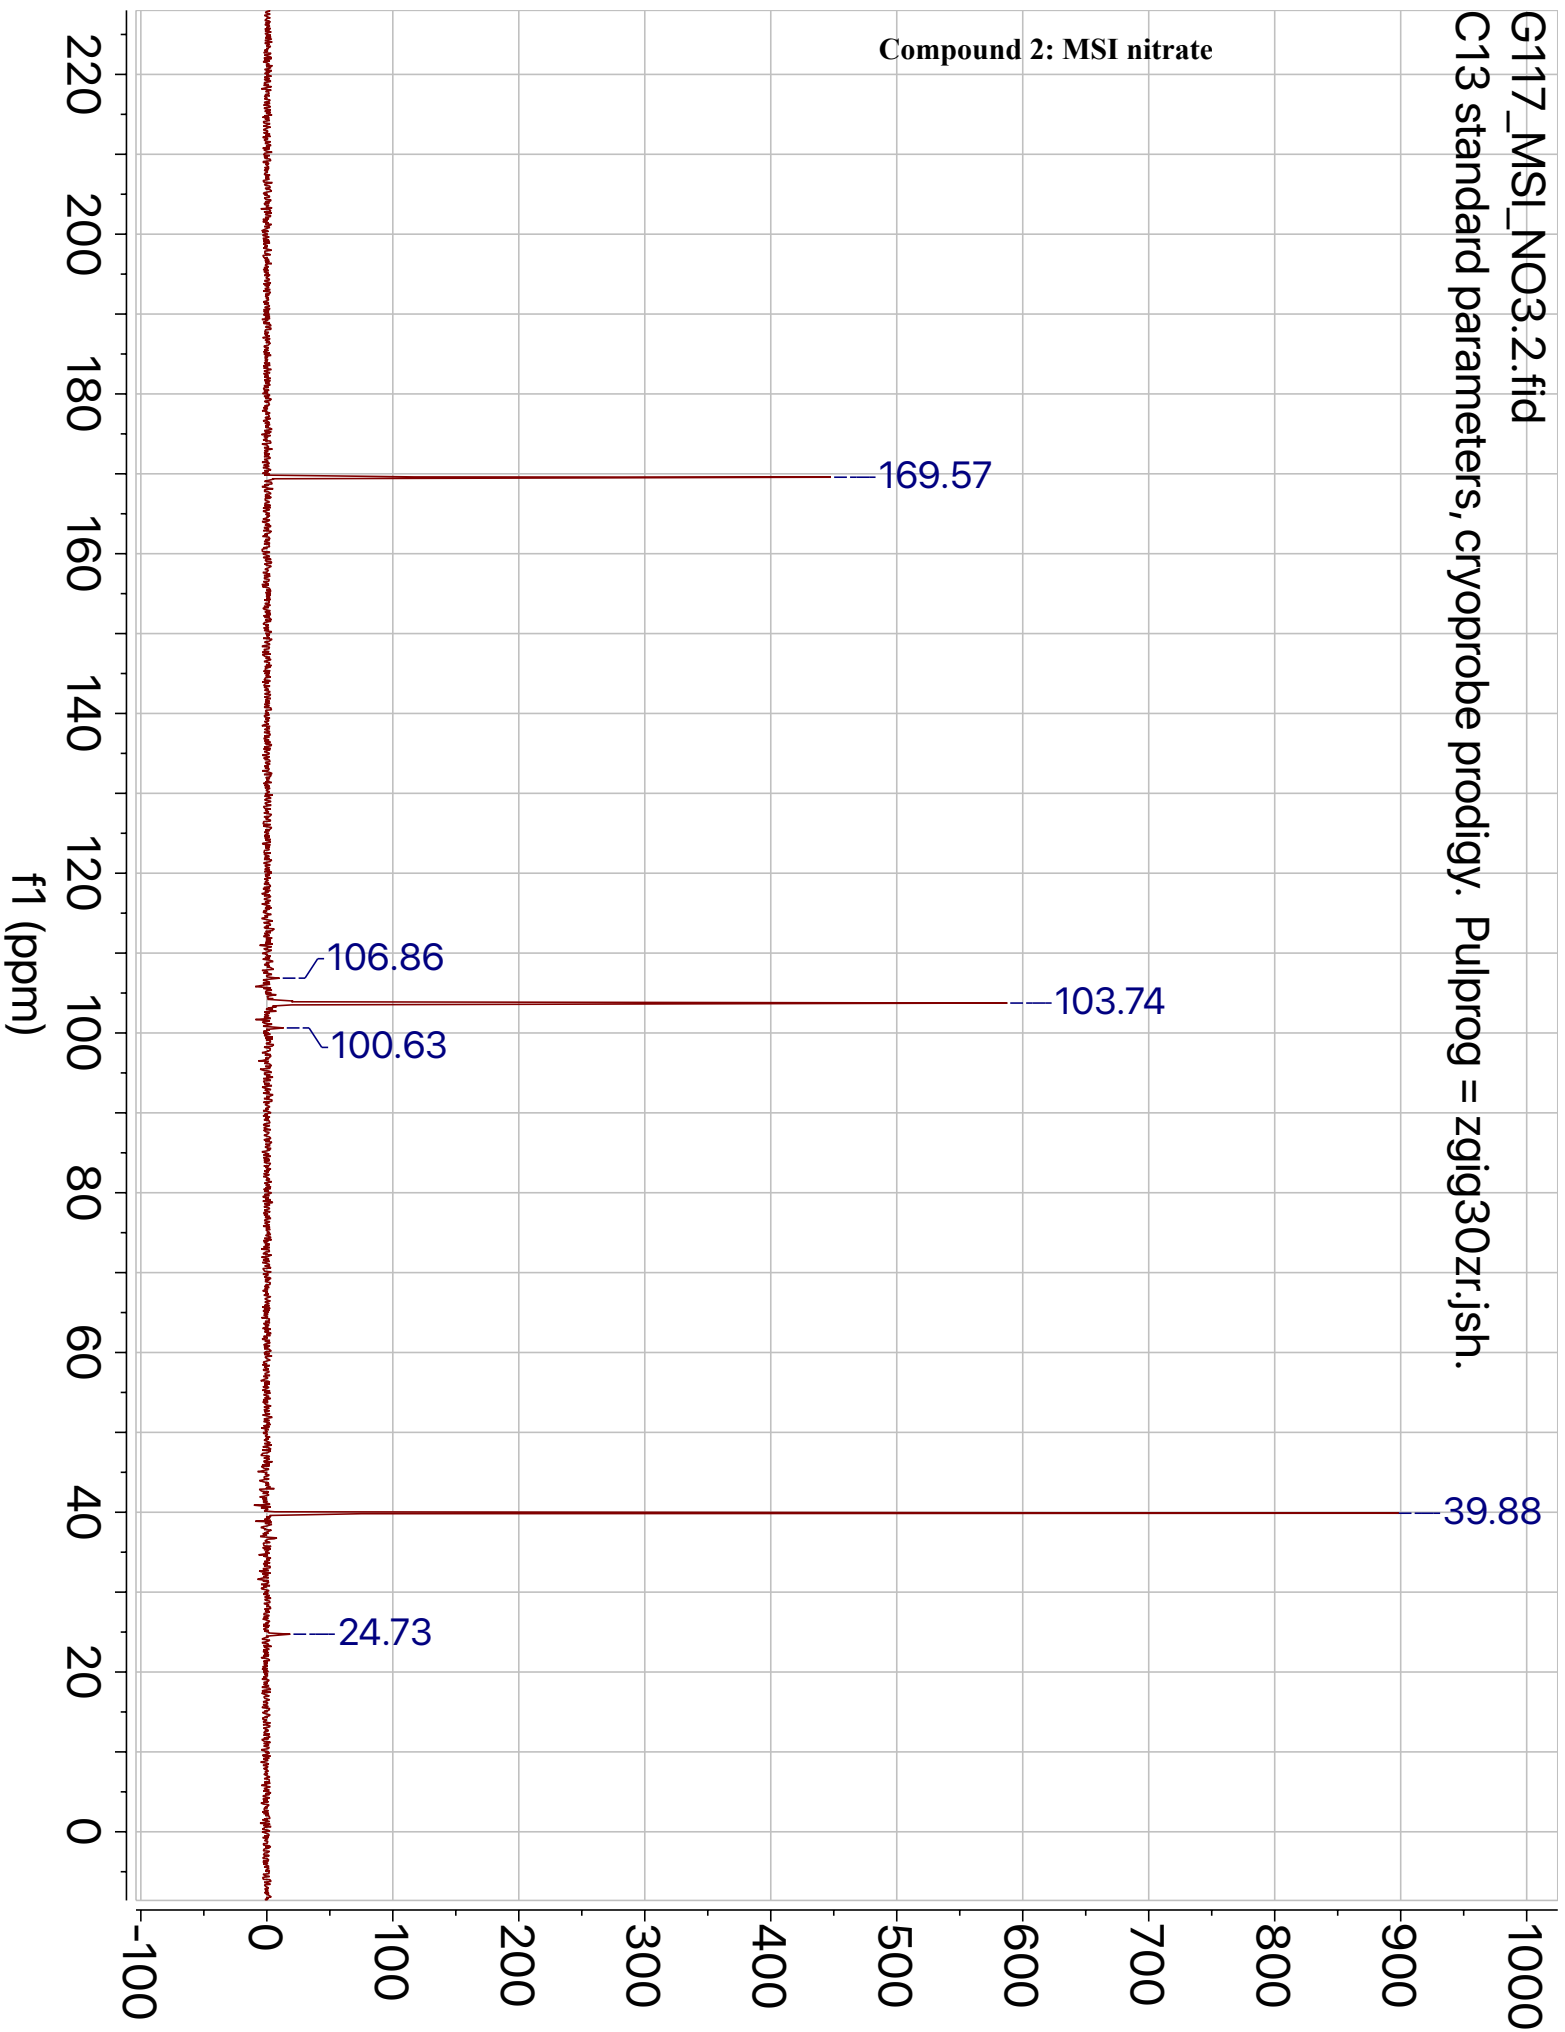

G117e\_MSI\_C1O4.1.fid

H1 standard parameters, cryoprobe prodigy

Compound 3: MSI perchlorate

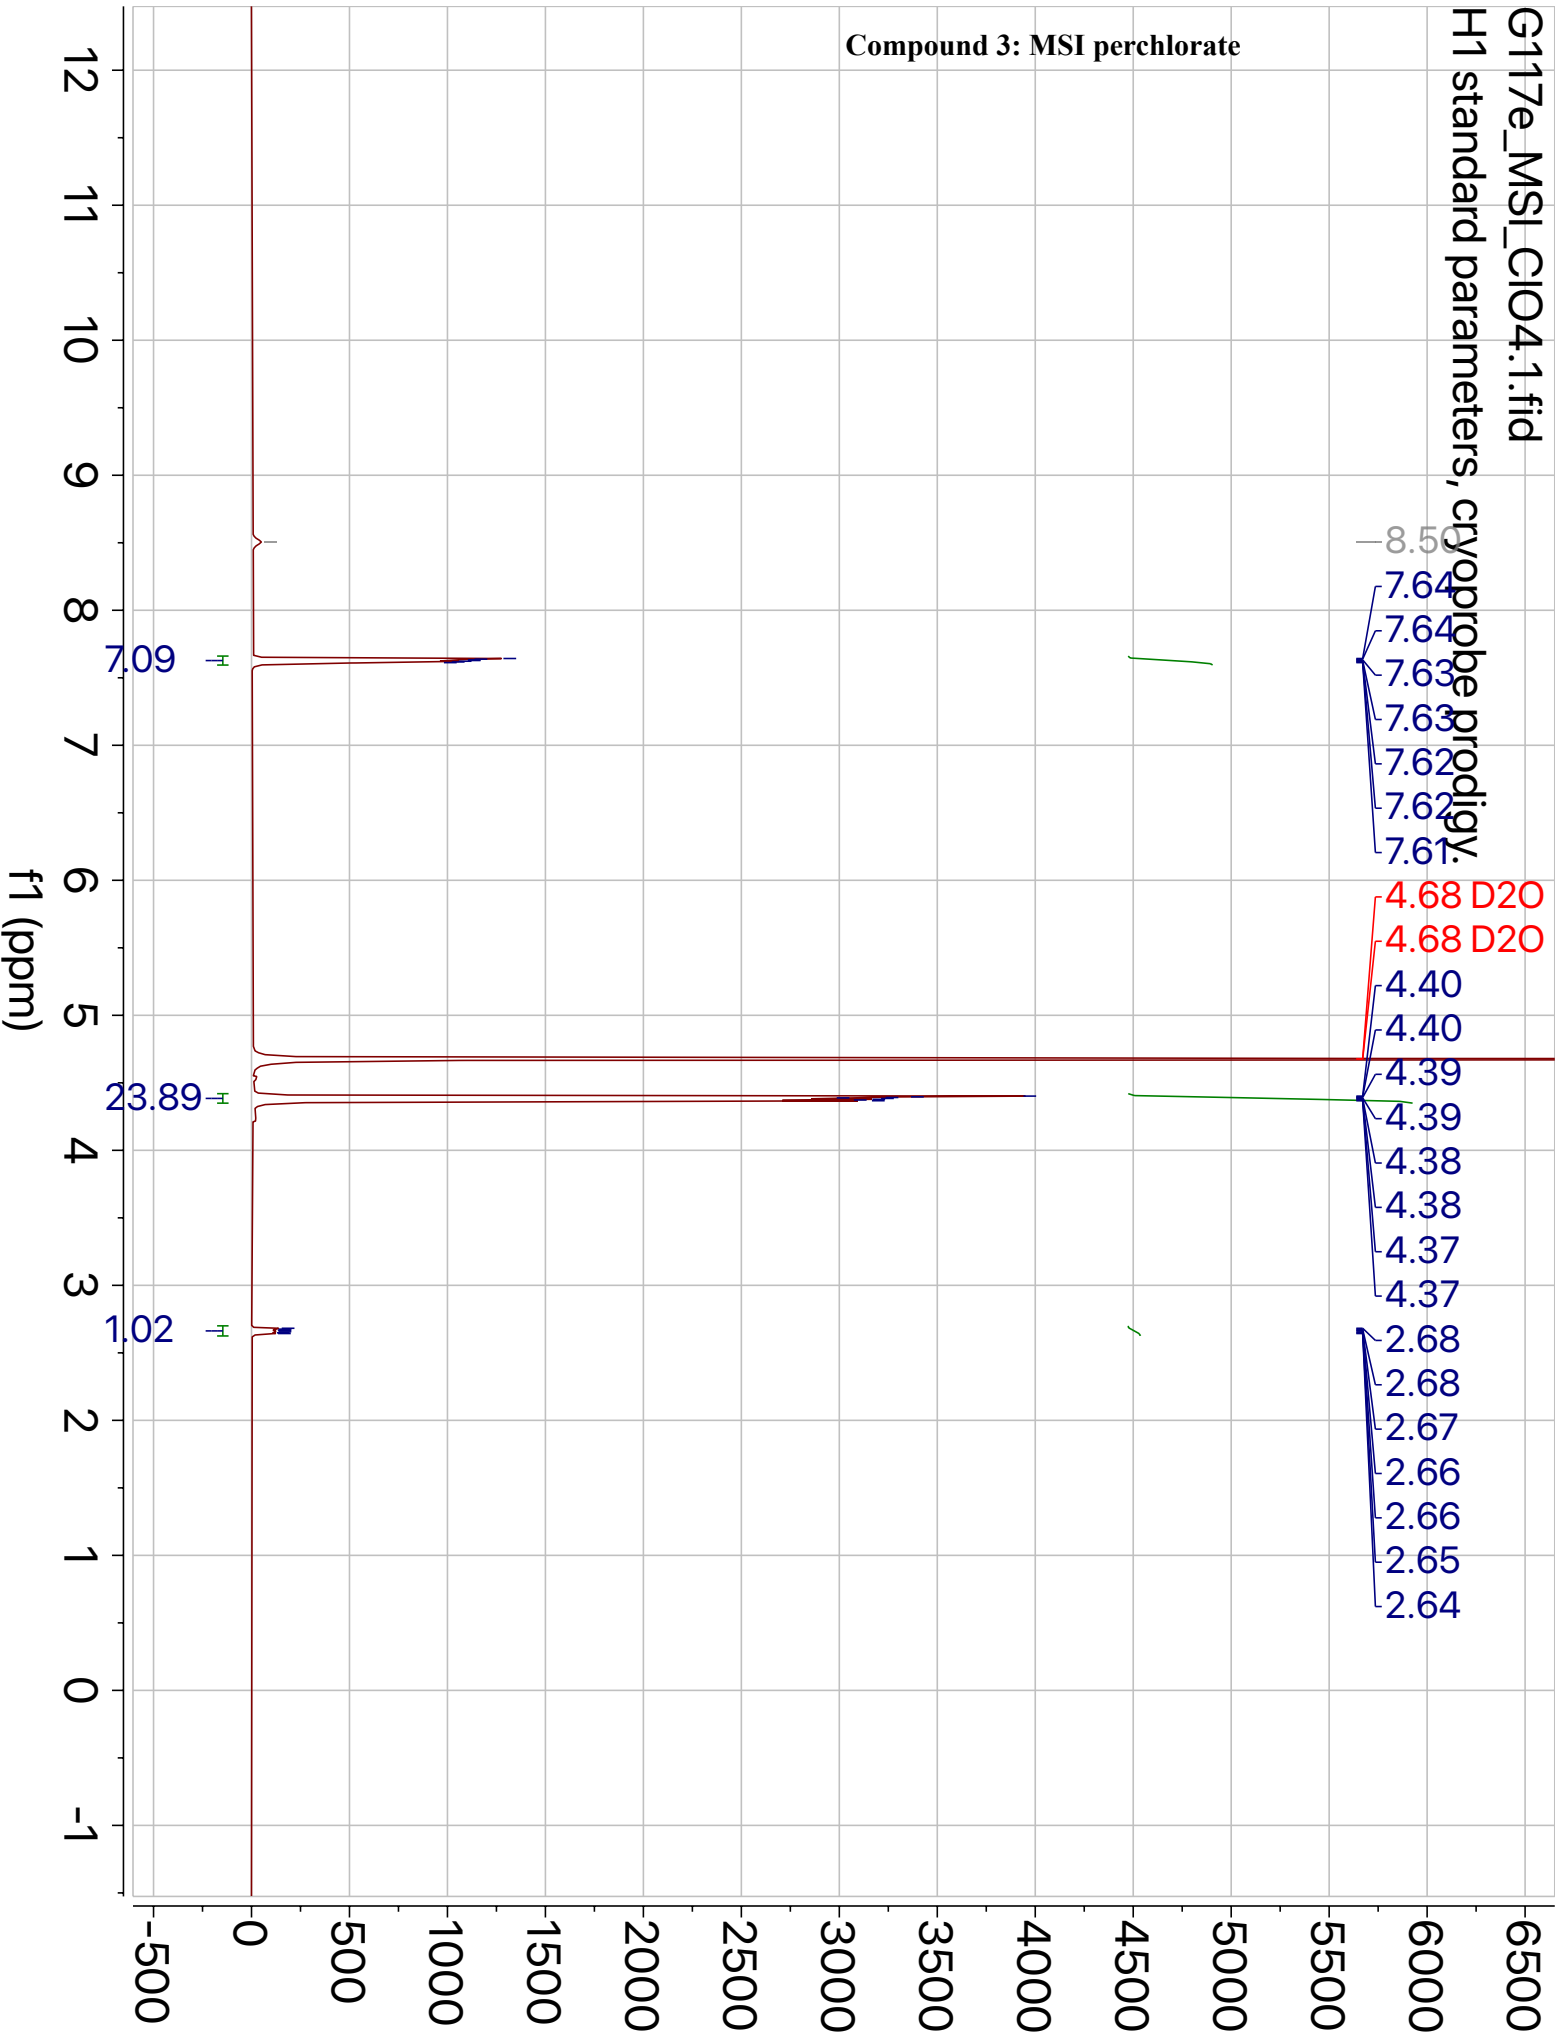

G117e\_MSI\_ClO4.2.fid

C13 standard parameters, cryoprobe prodigy. Pulprog = zgig30zr.jsh.

Compound 3: MSI perchlorate

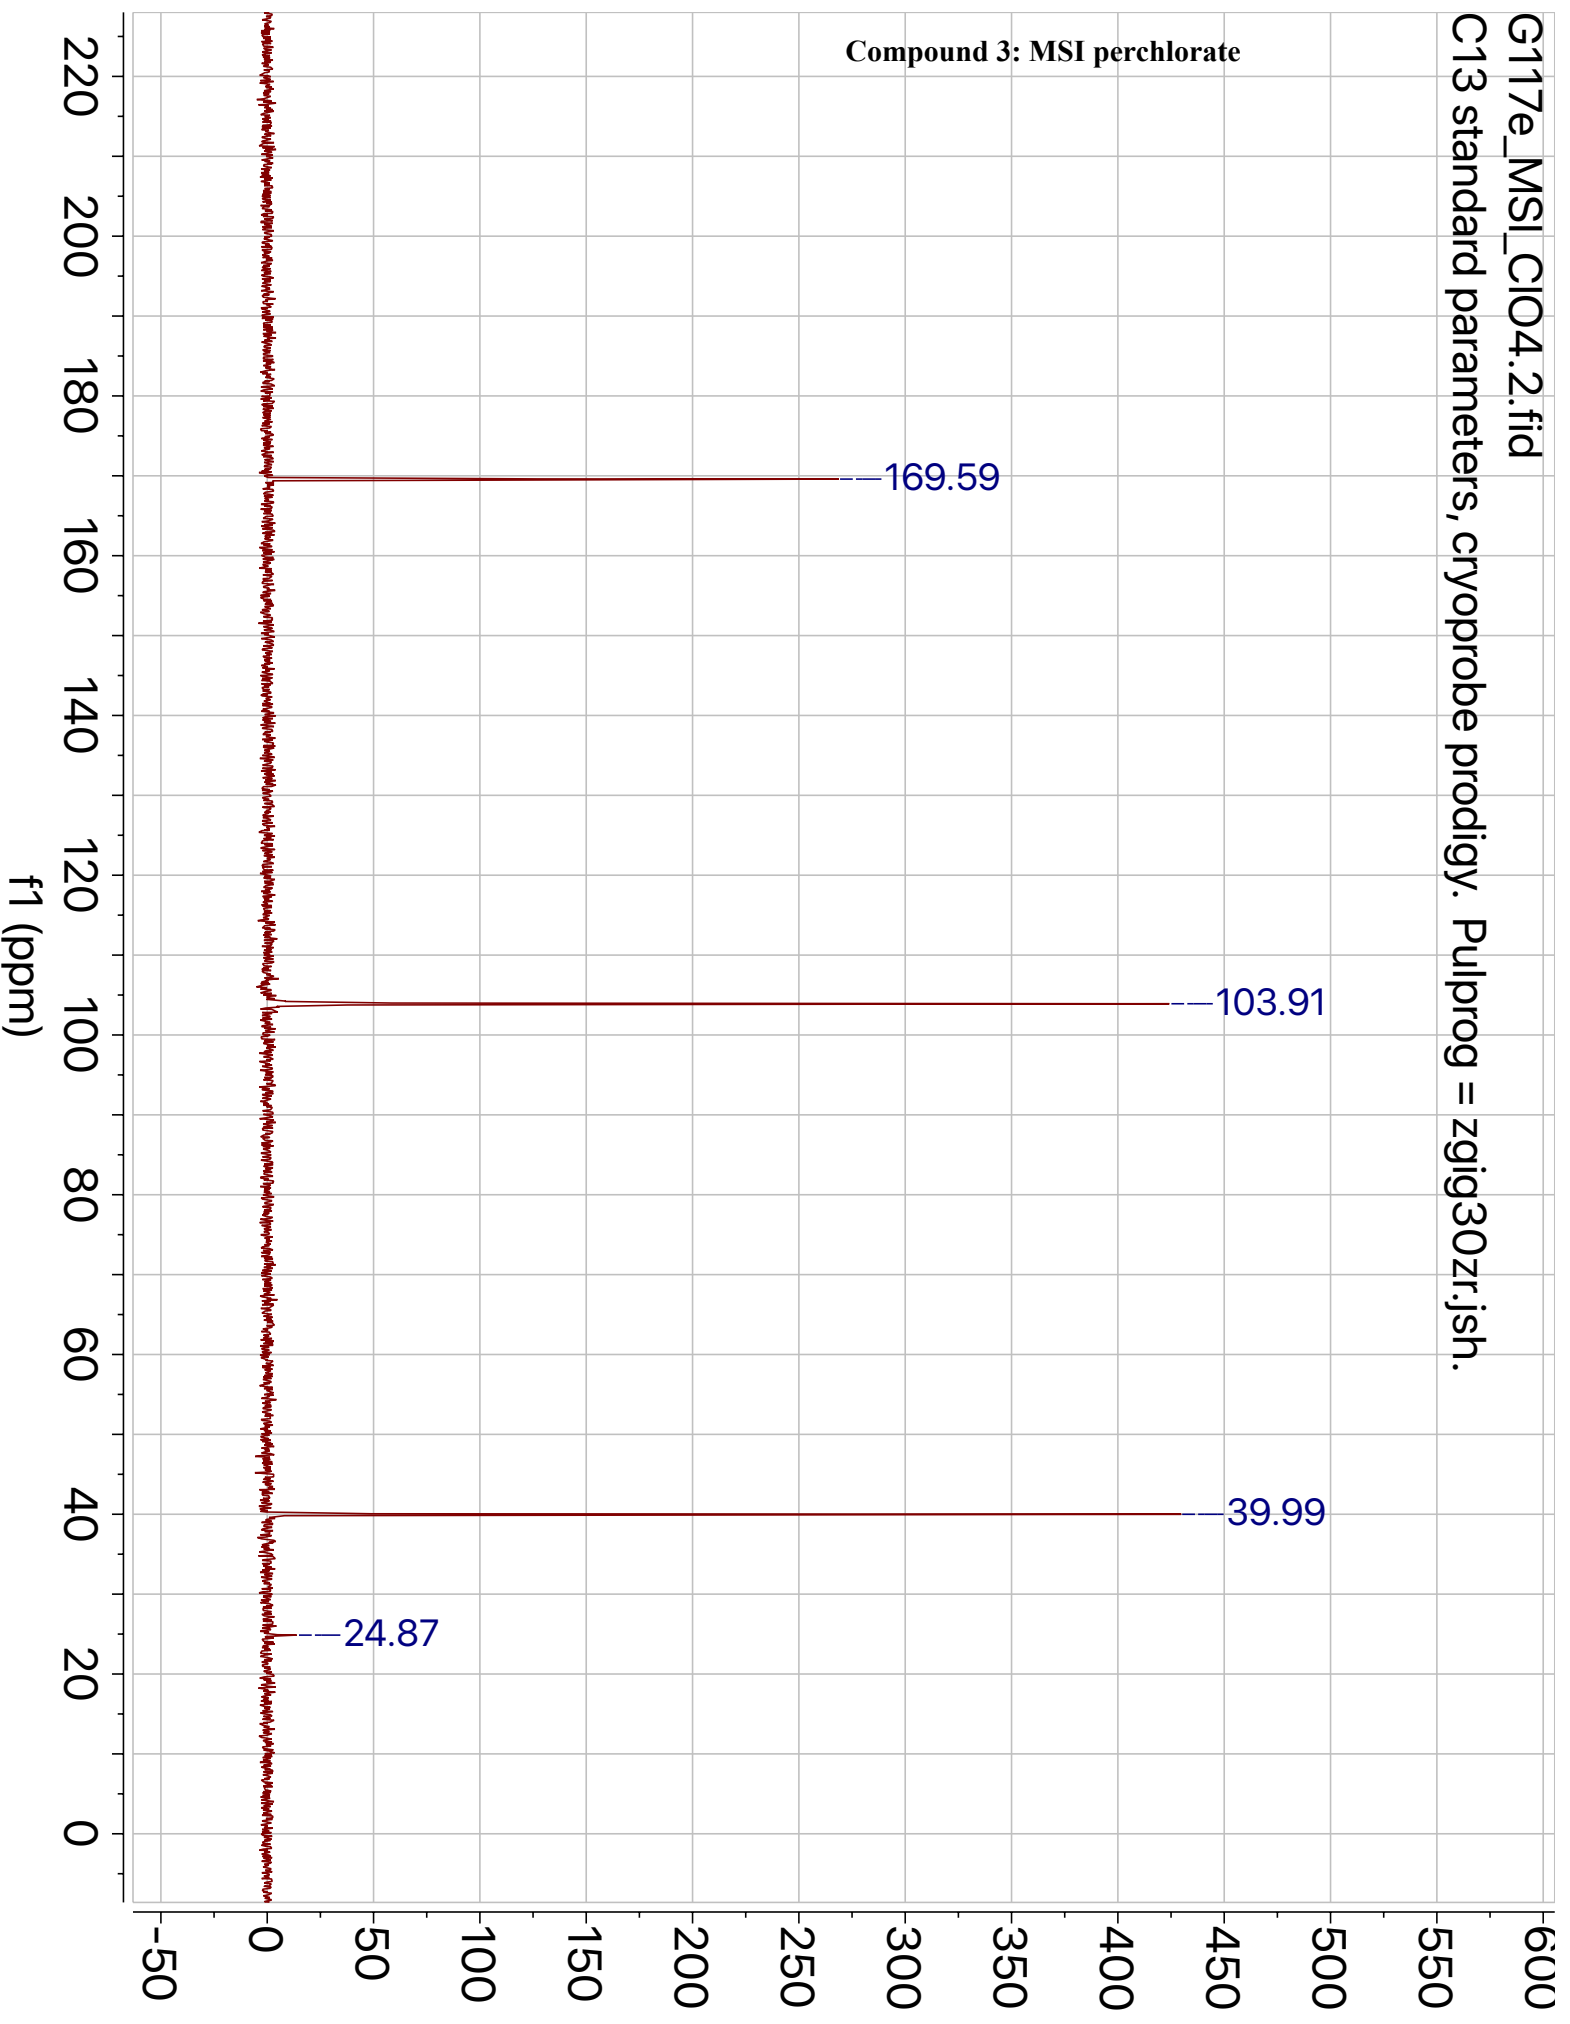

Compound 4: MSI nitrotetrazole

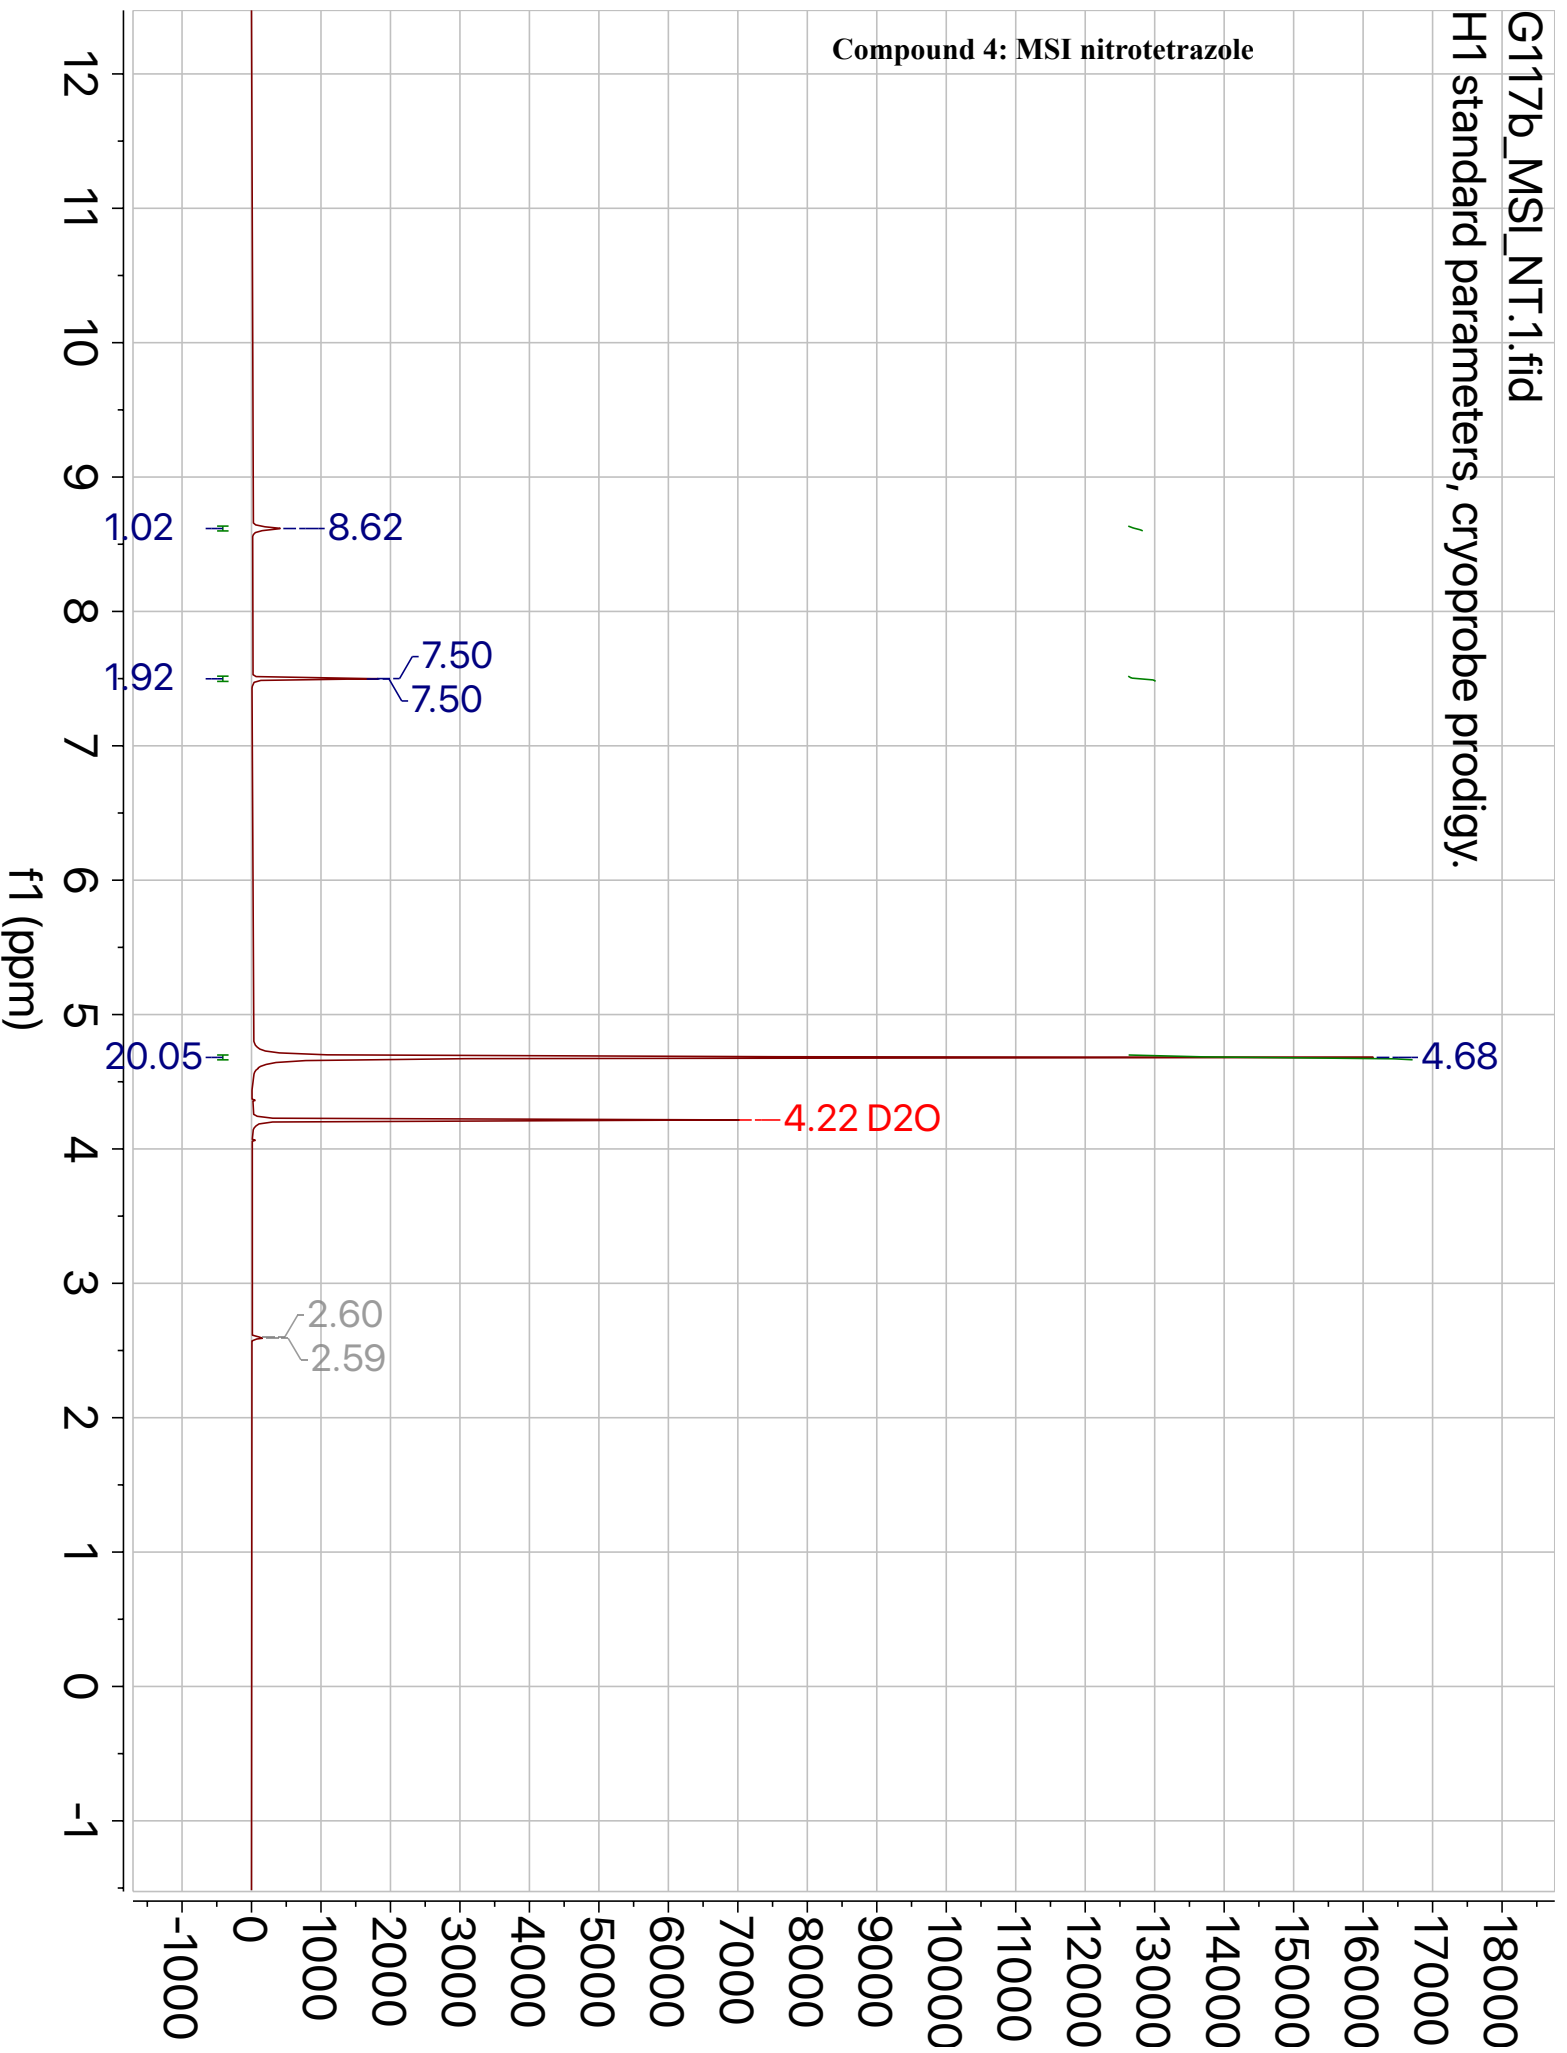

Compound 4: MSI nitrotetrazole

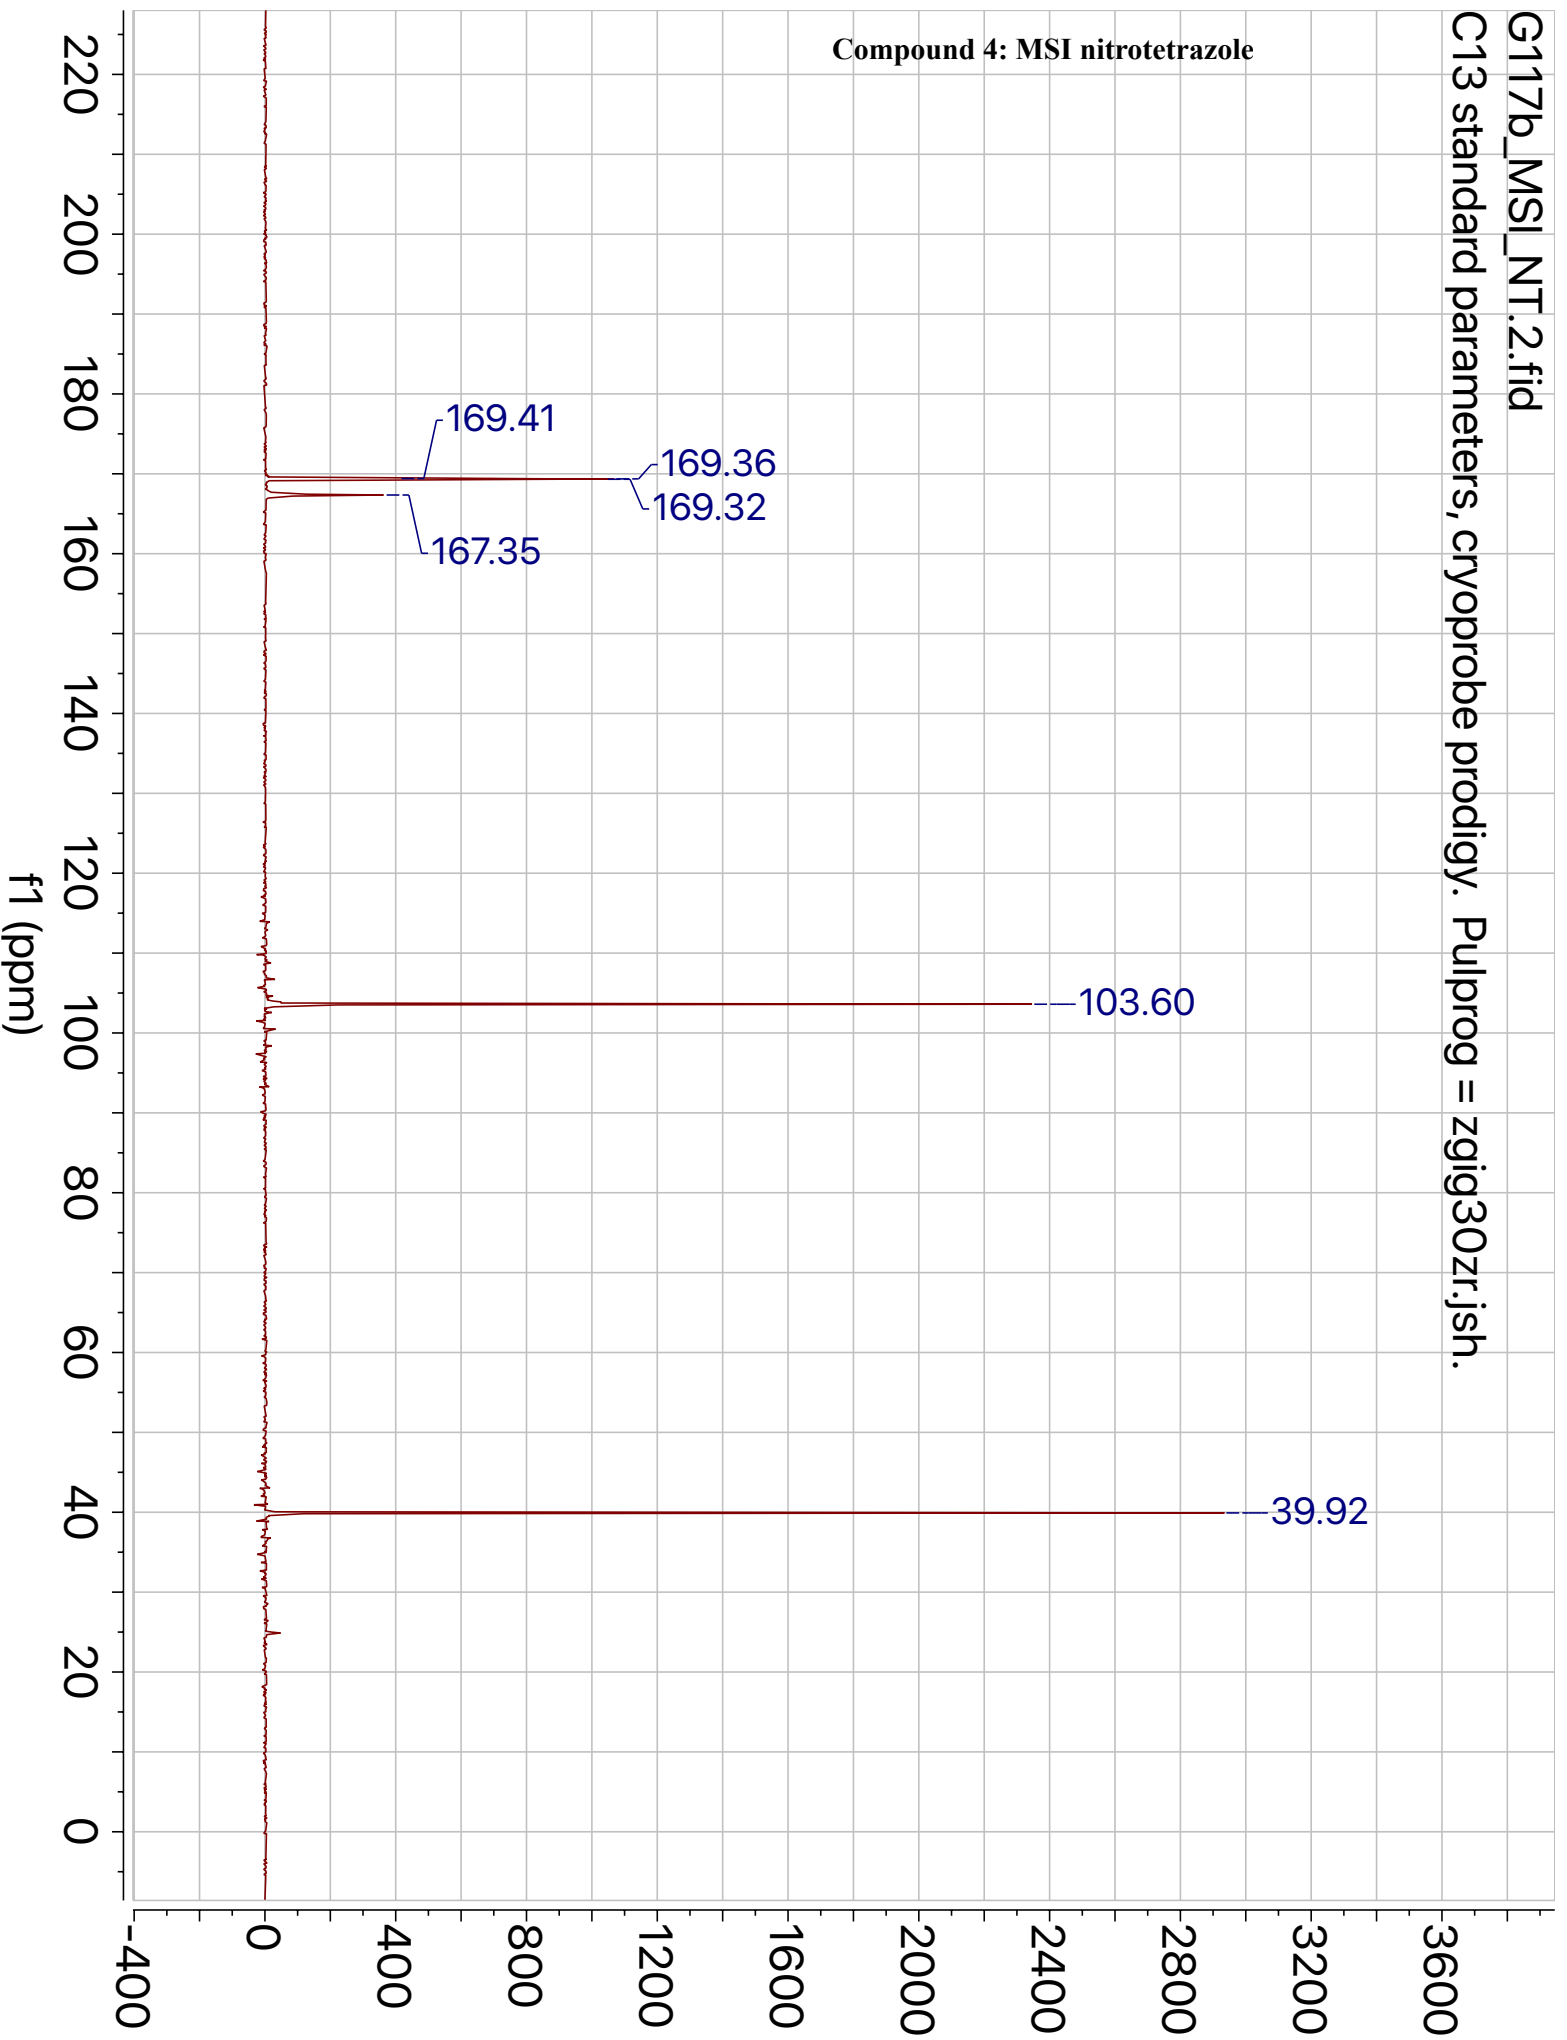

G117f\_MSI\_DNTT\_2.1.fid

H1 standard parameters, cryoprobe prodigy.

Compound 5: MSI DNTT

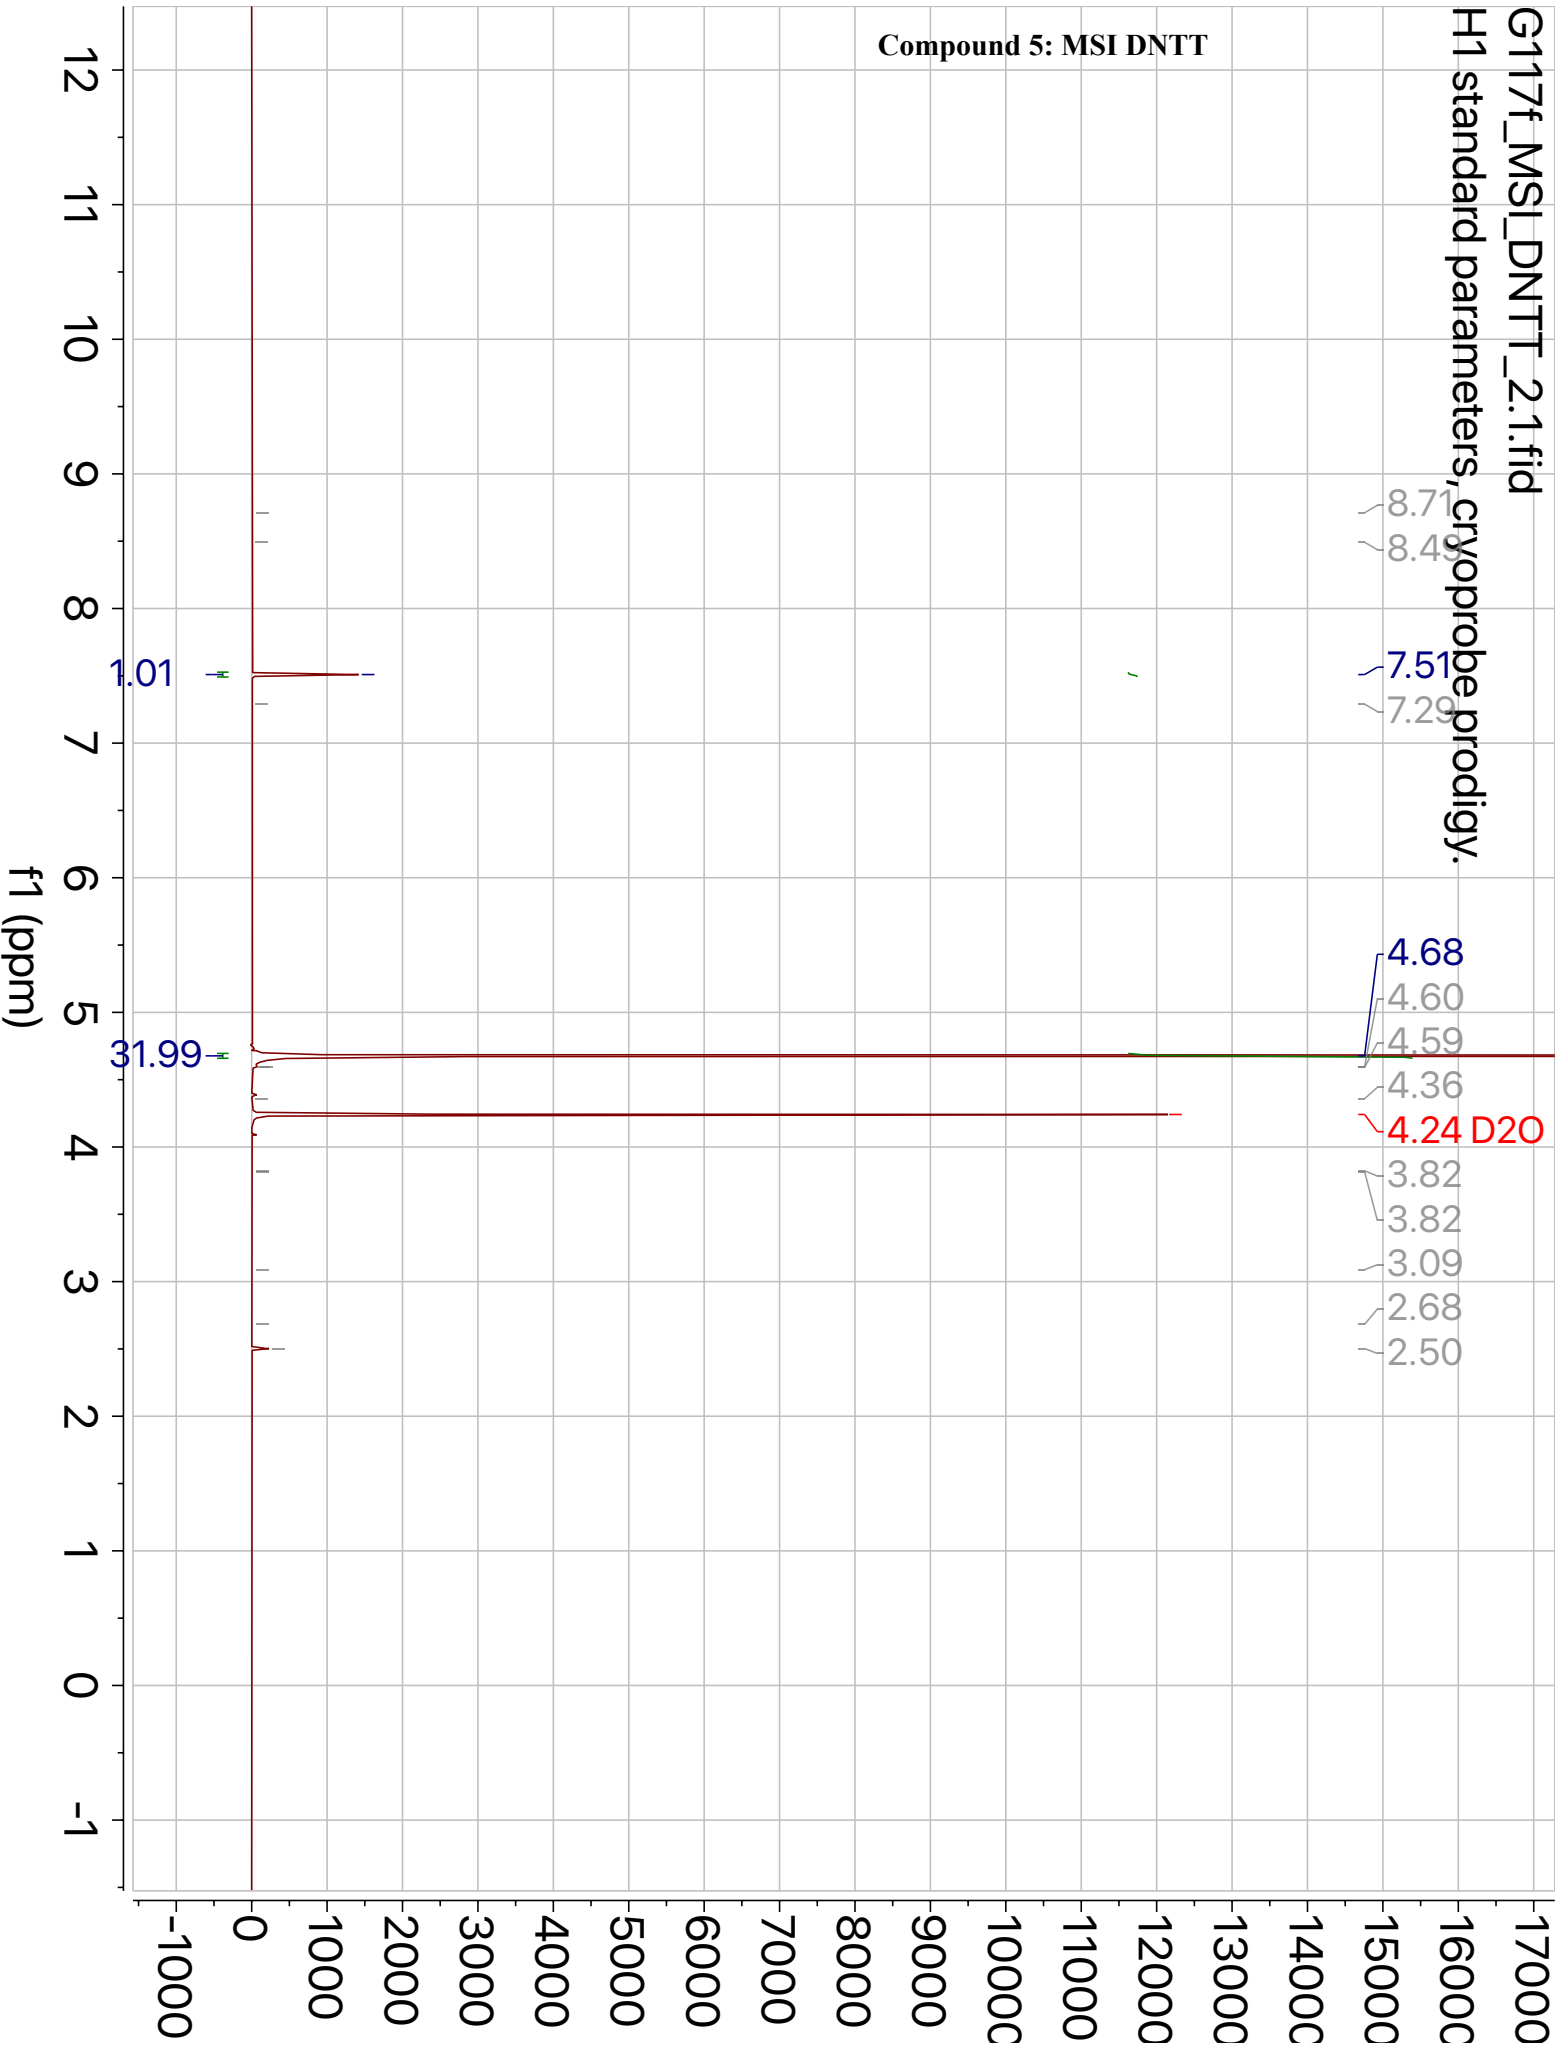



G117f\_MSI\_DNTT\_2.2.fid

C13 standard parameters, cryoprobe prodigy. Pulprog = zgig30zr.jsh.

Compound 5: MSI DNTT

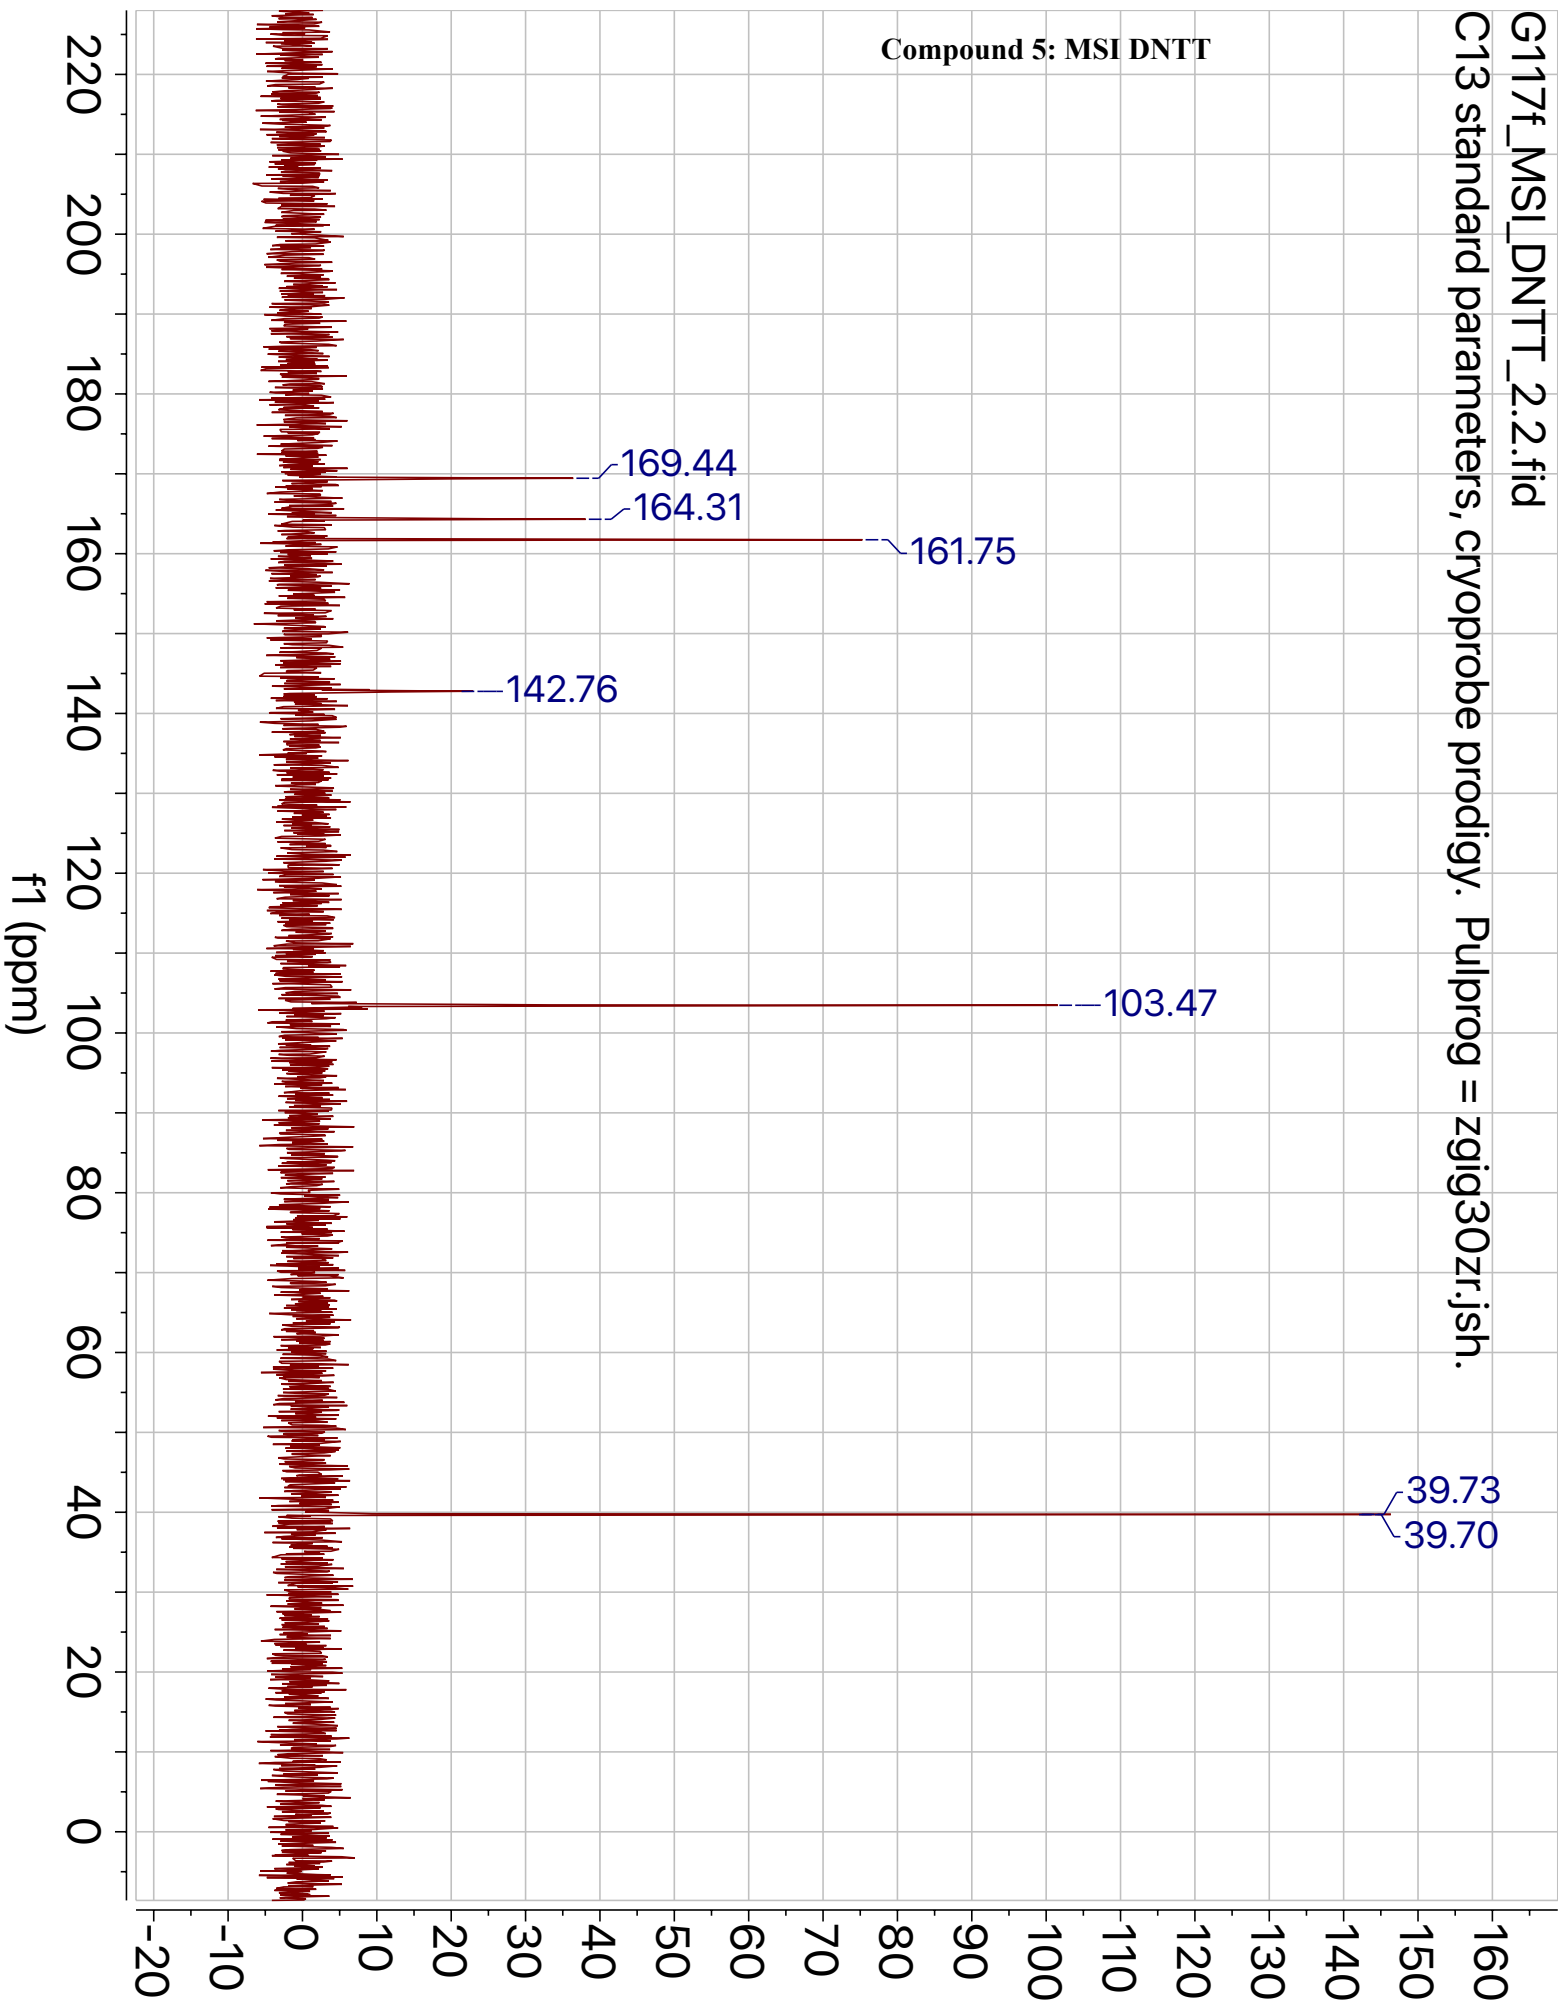

G117d\_MSL\_TAZ.1.fid

H1 standard parameters, cryoprobe prodigy.

Compound 6: MSI Tetrazole Azasydnone

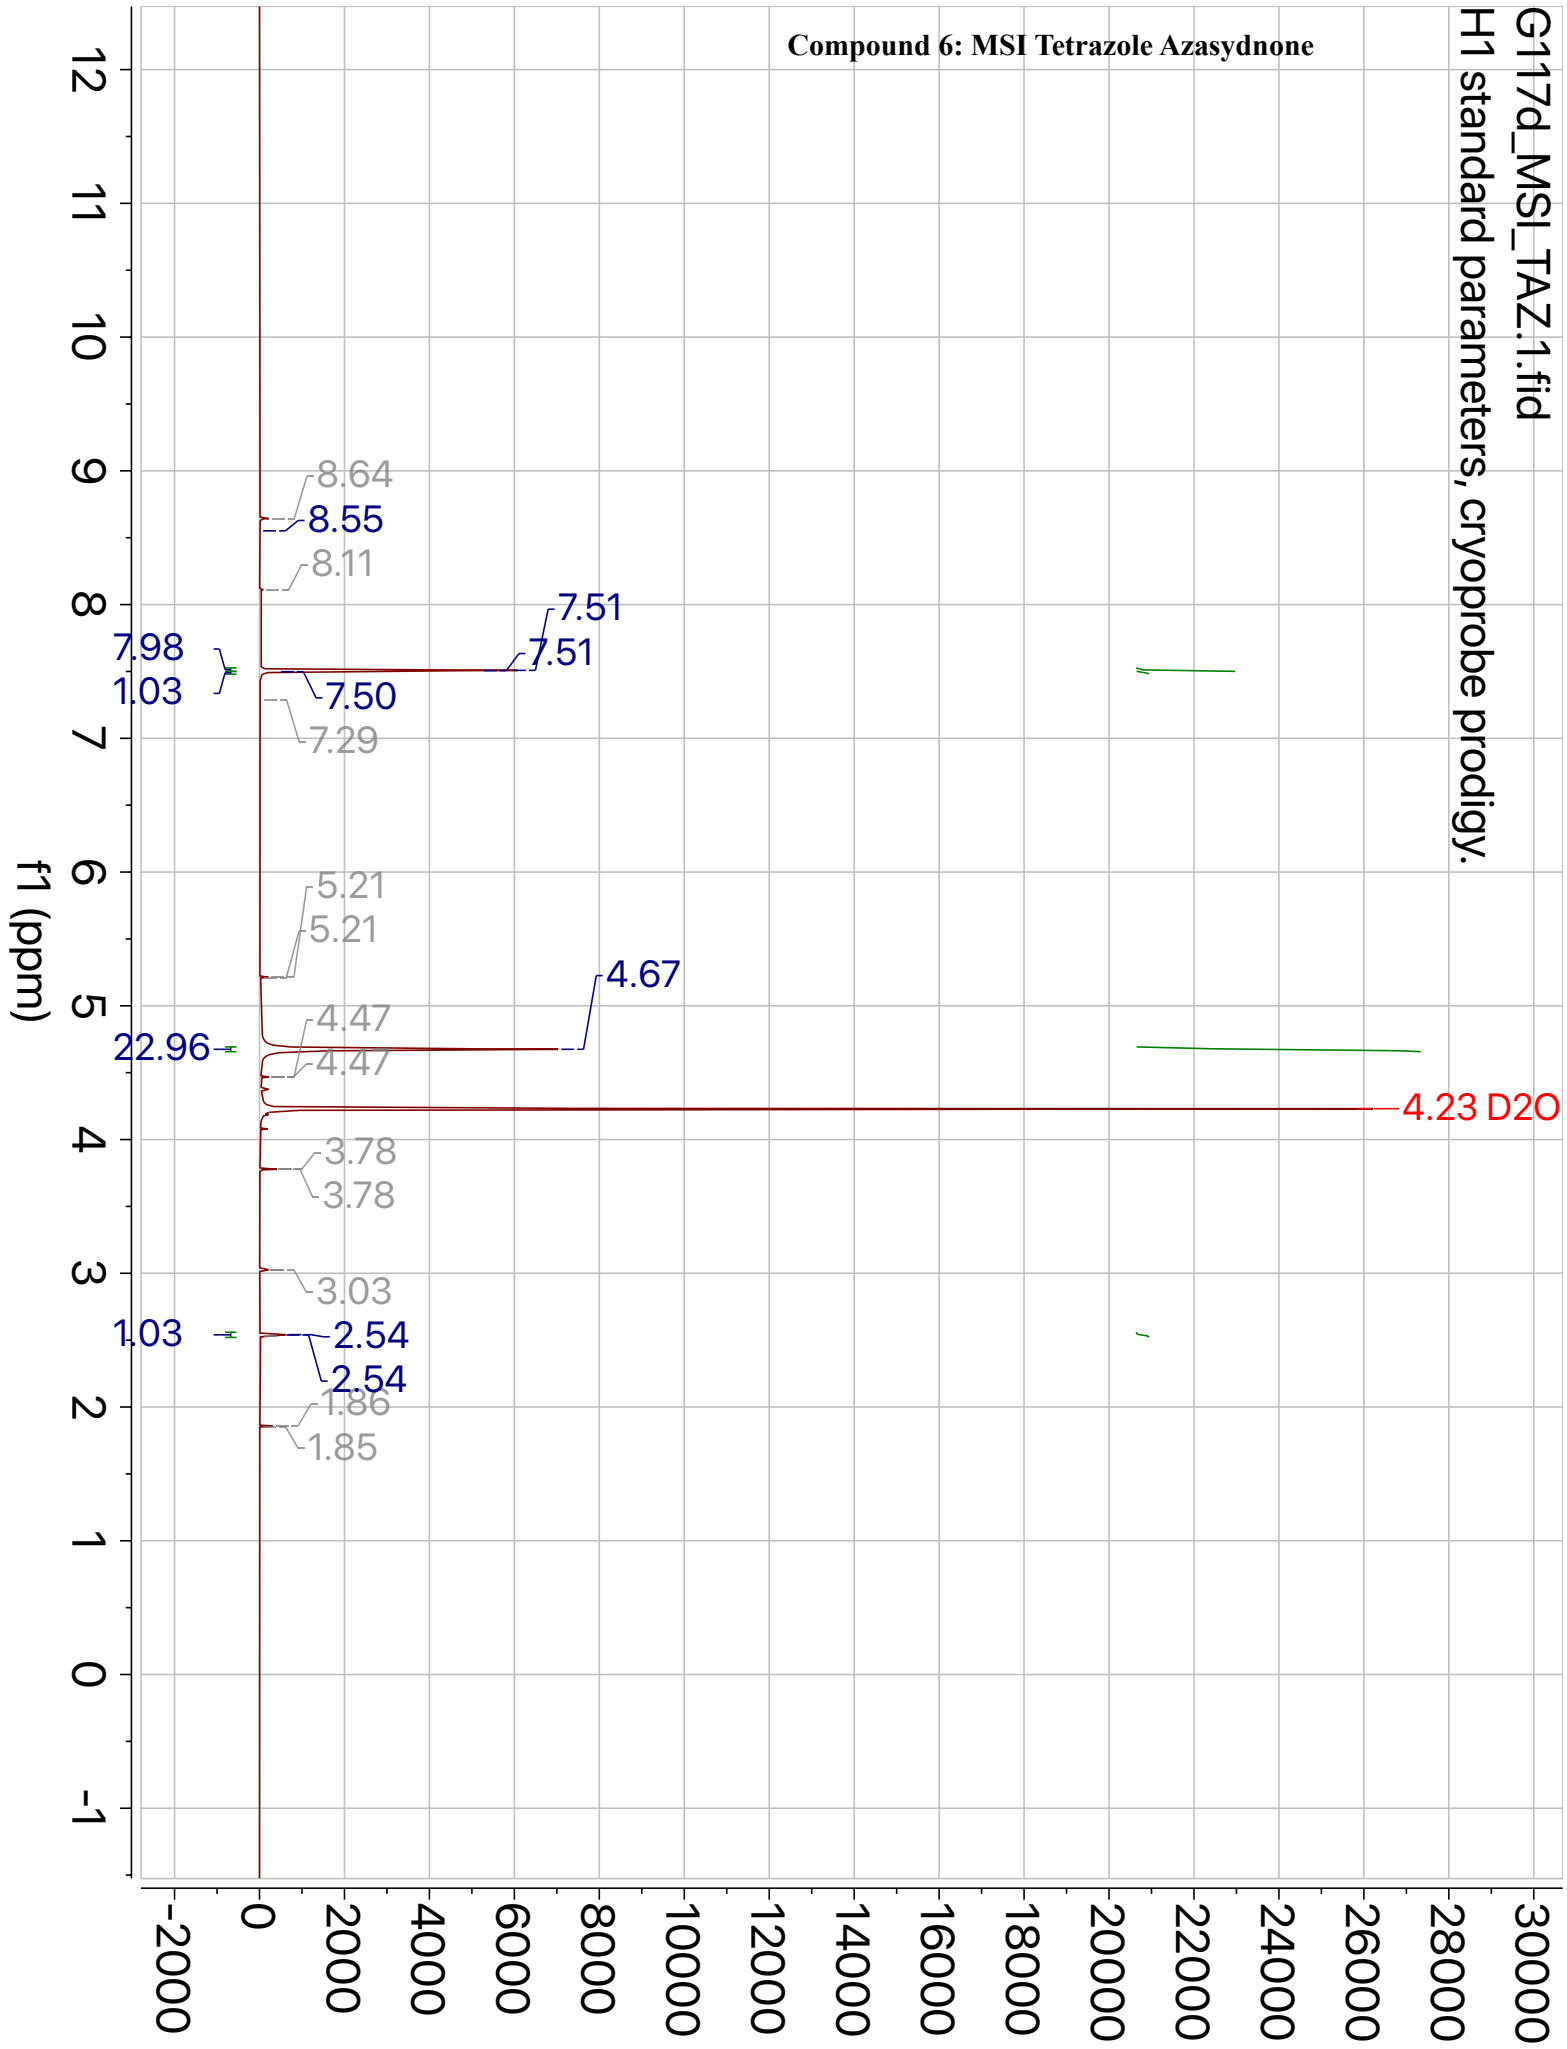

G117d\_MSI\_TAZ.2.fid

C13 standard parameters, cryoprobe prodigy. Pulprog = zgig30zr.jsh.

Compound 6: MSI Tetrazole Azasydnone

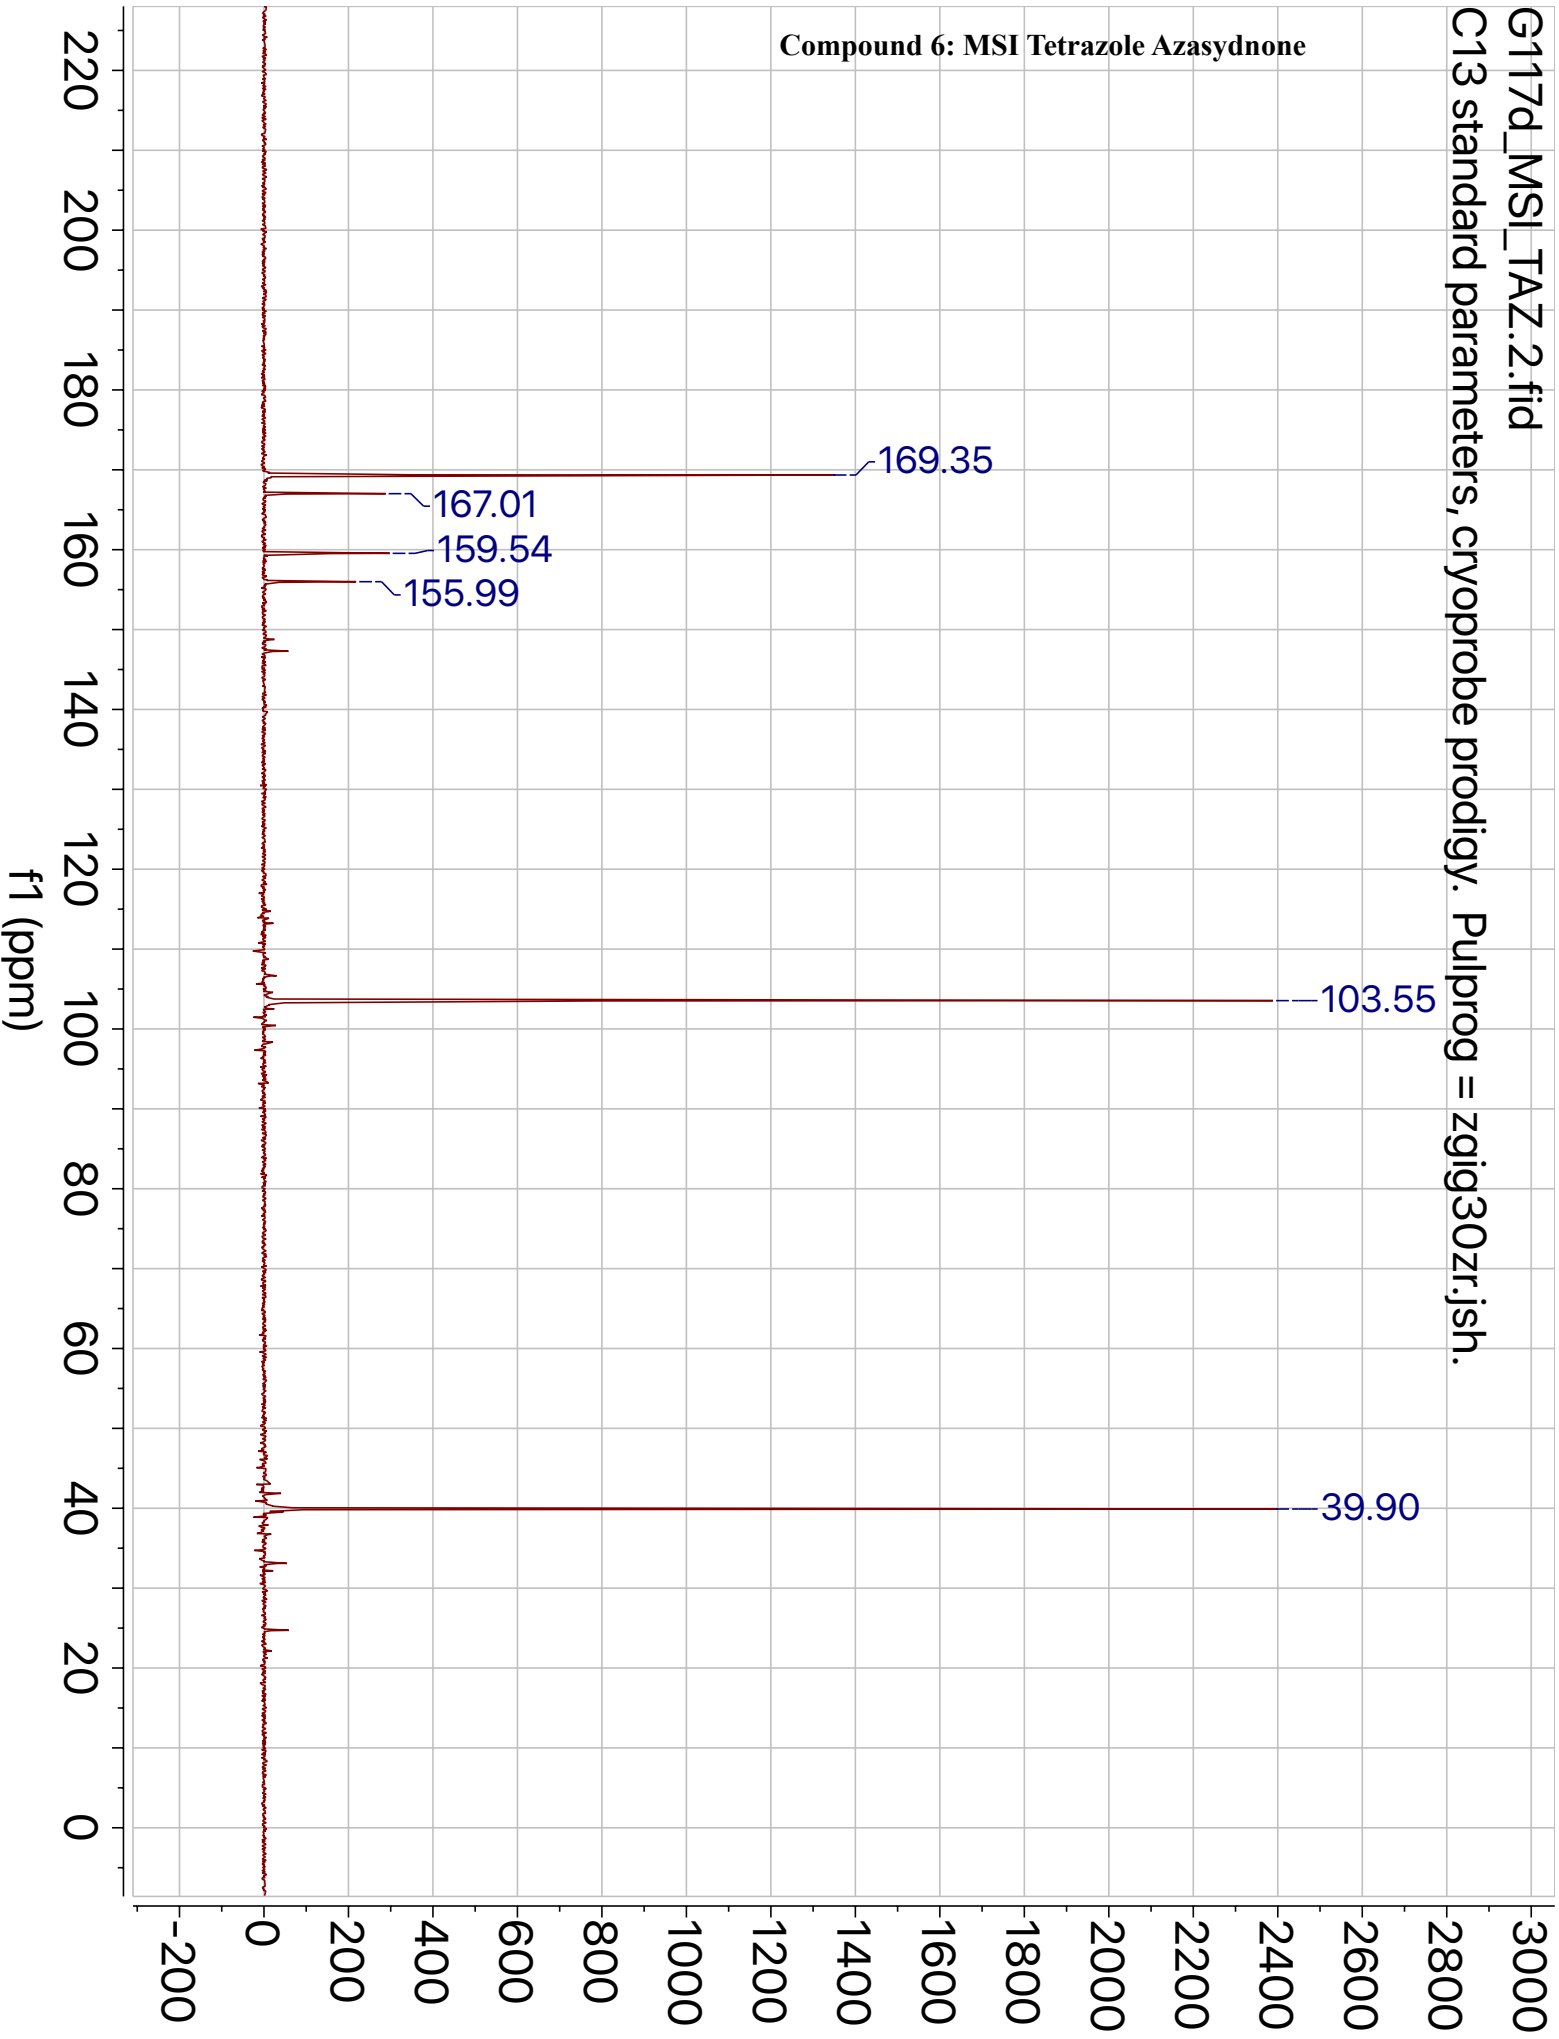

G117c4\_MSI\_NO2BF4\_1.1.fid

H1 standard parameters, cryoprobe prodigy.

Compound 8: 3-methyl-1,2,3-oxadiazolium nitrosoamide

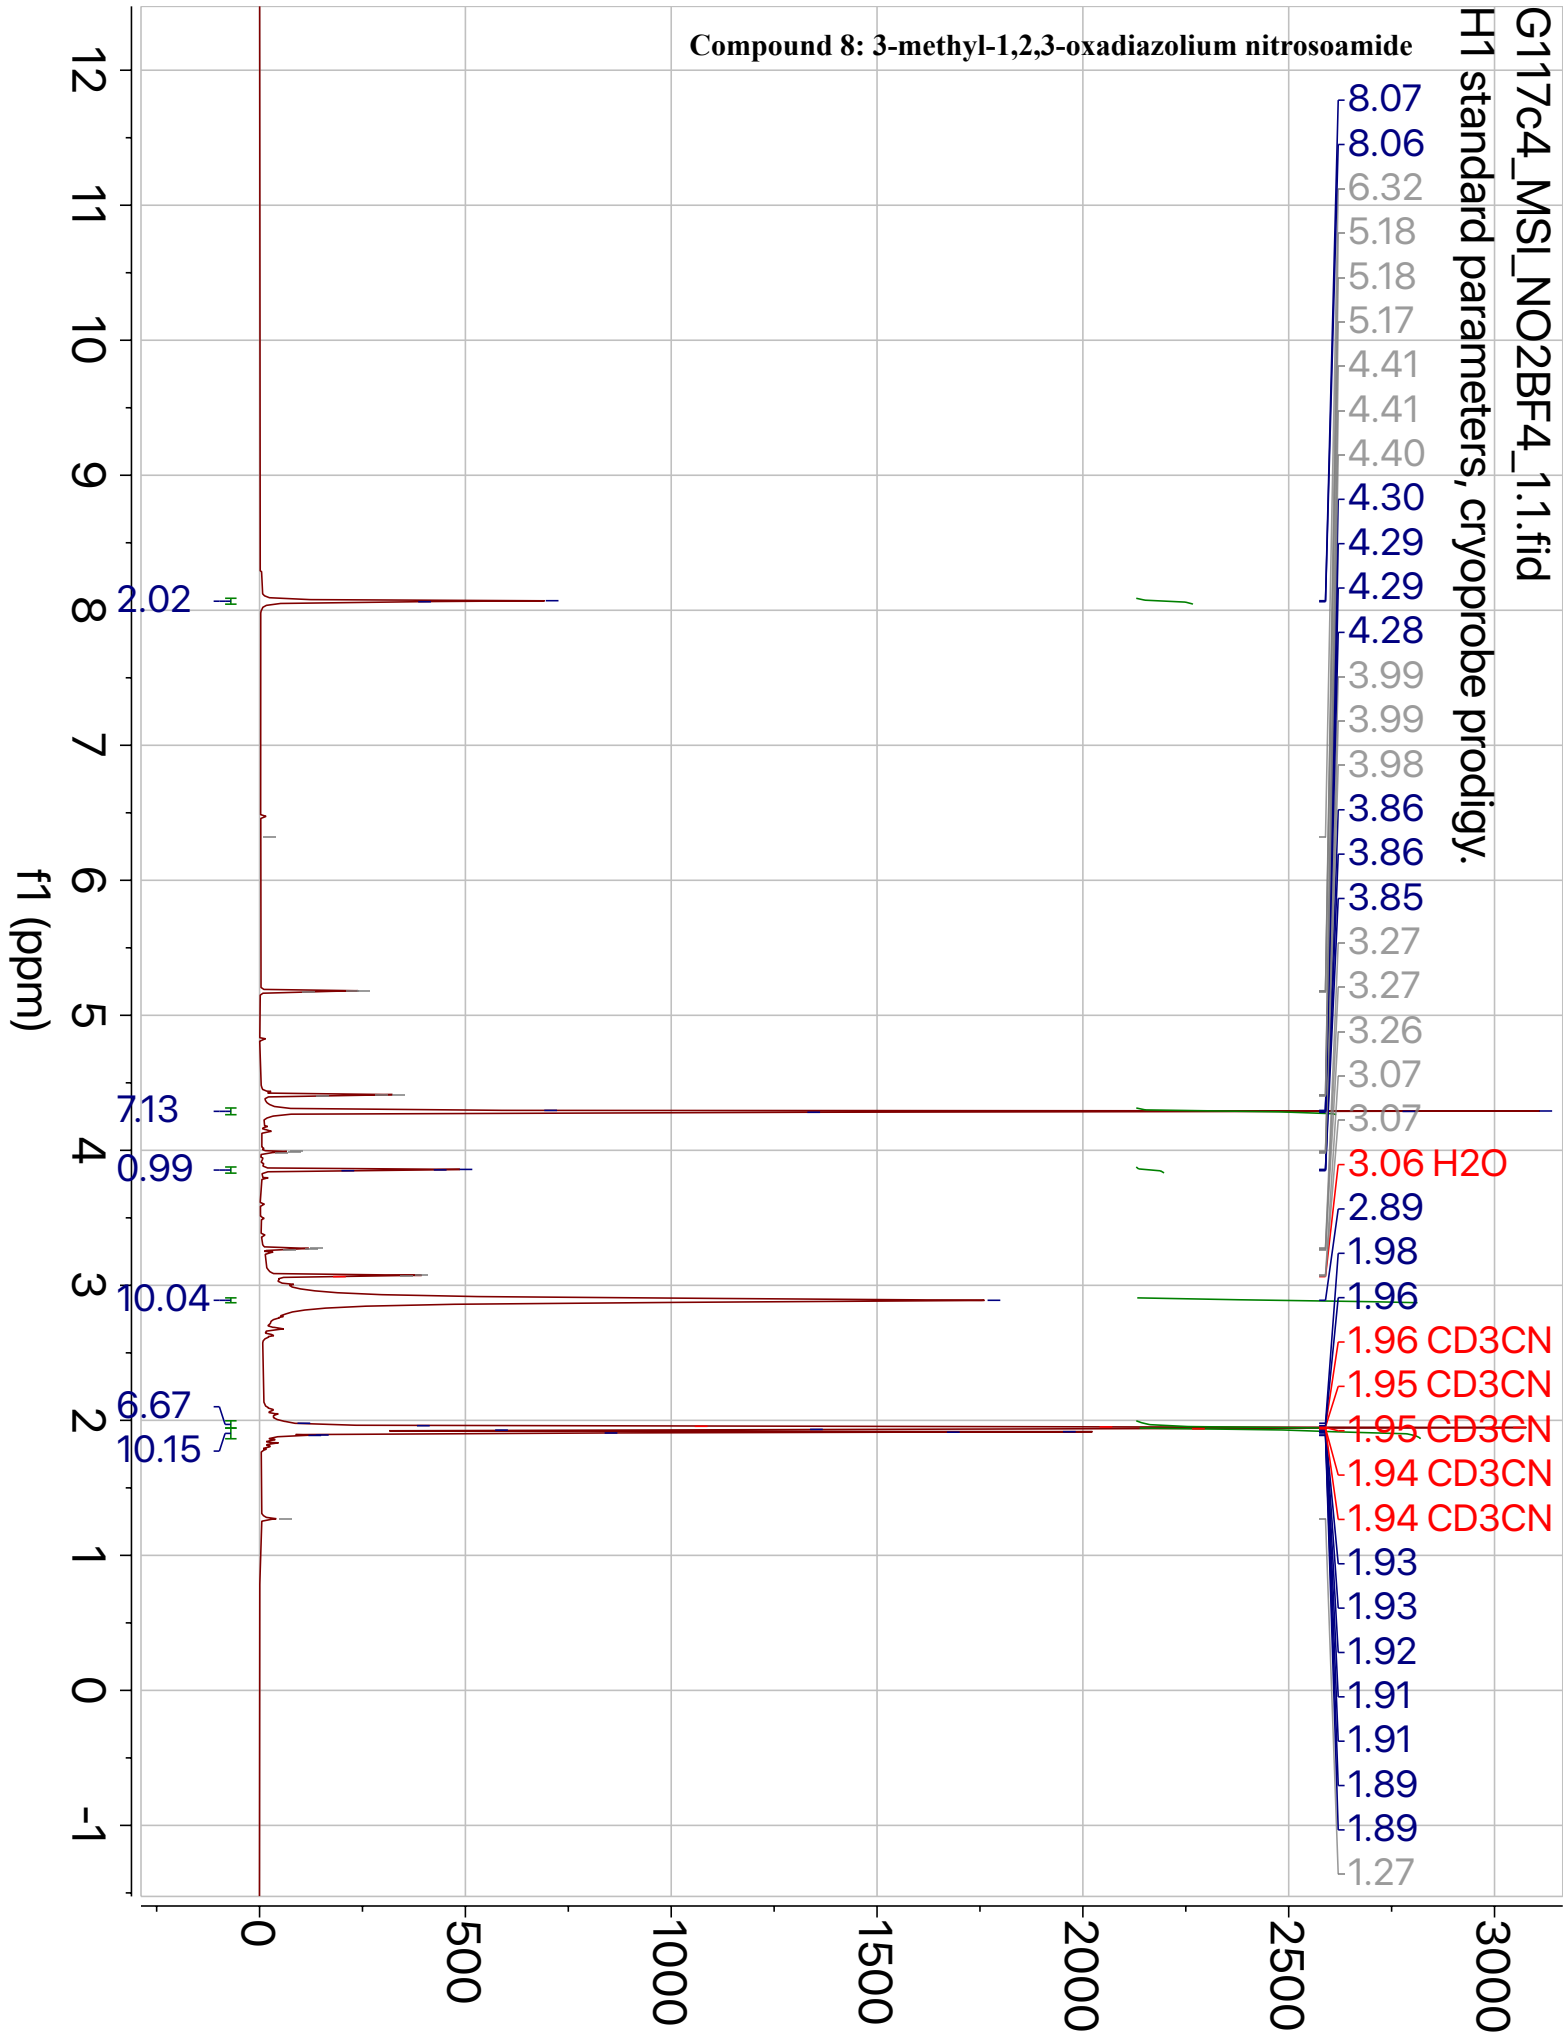

G117c4\_MSI\_NO2BF4\_1.2.fid

C13 standard parameters, cryoprobe prodigy. Pulprog = zgig30zr.jsh.

Compound 8: 3-methyl-1,2,3-oxadiazolium nitrosoamide

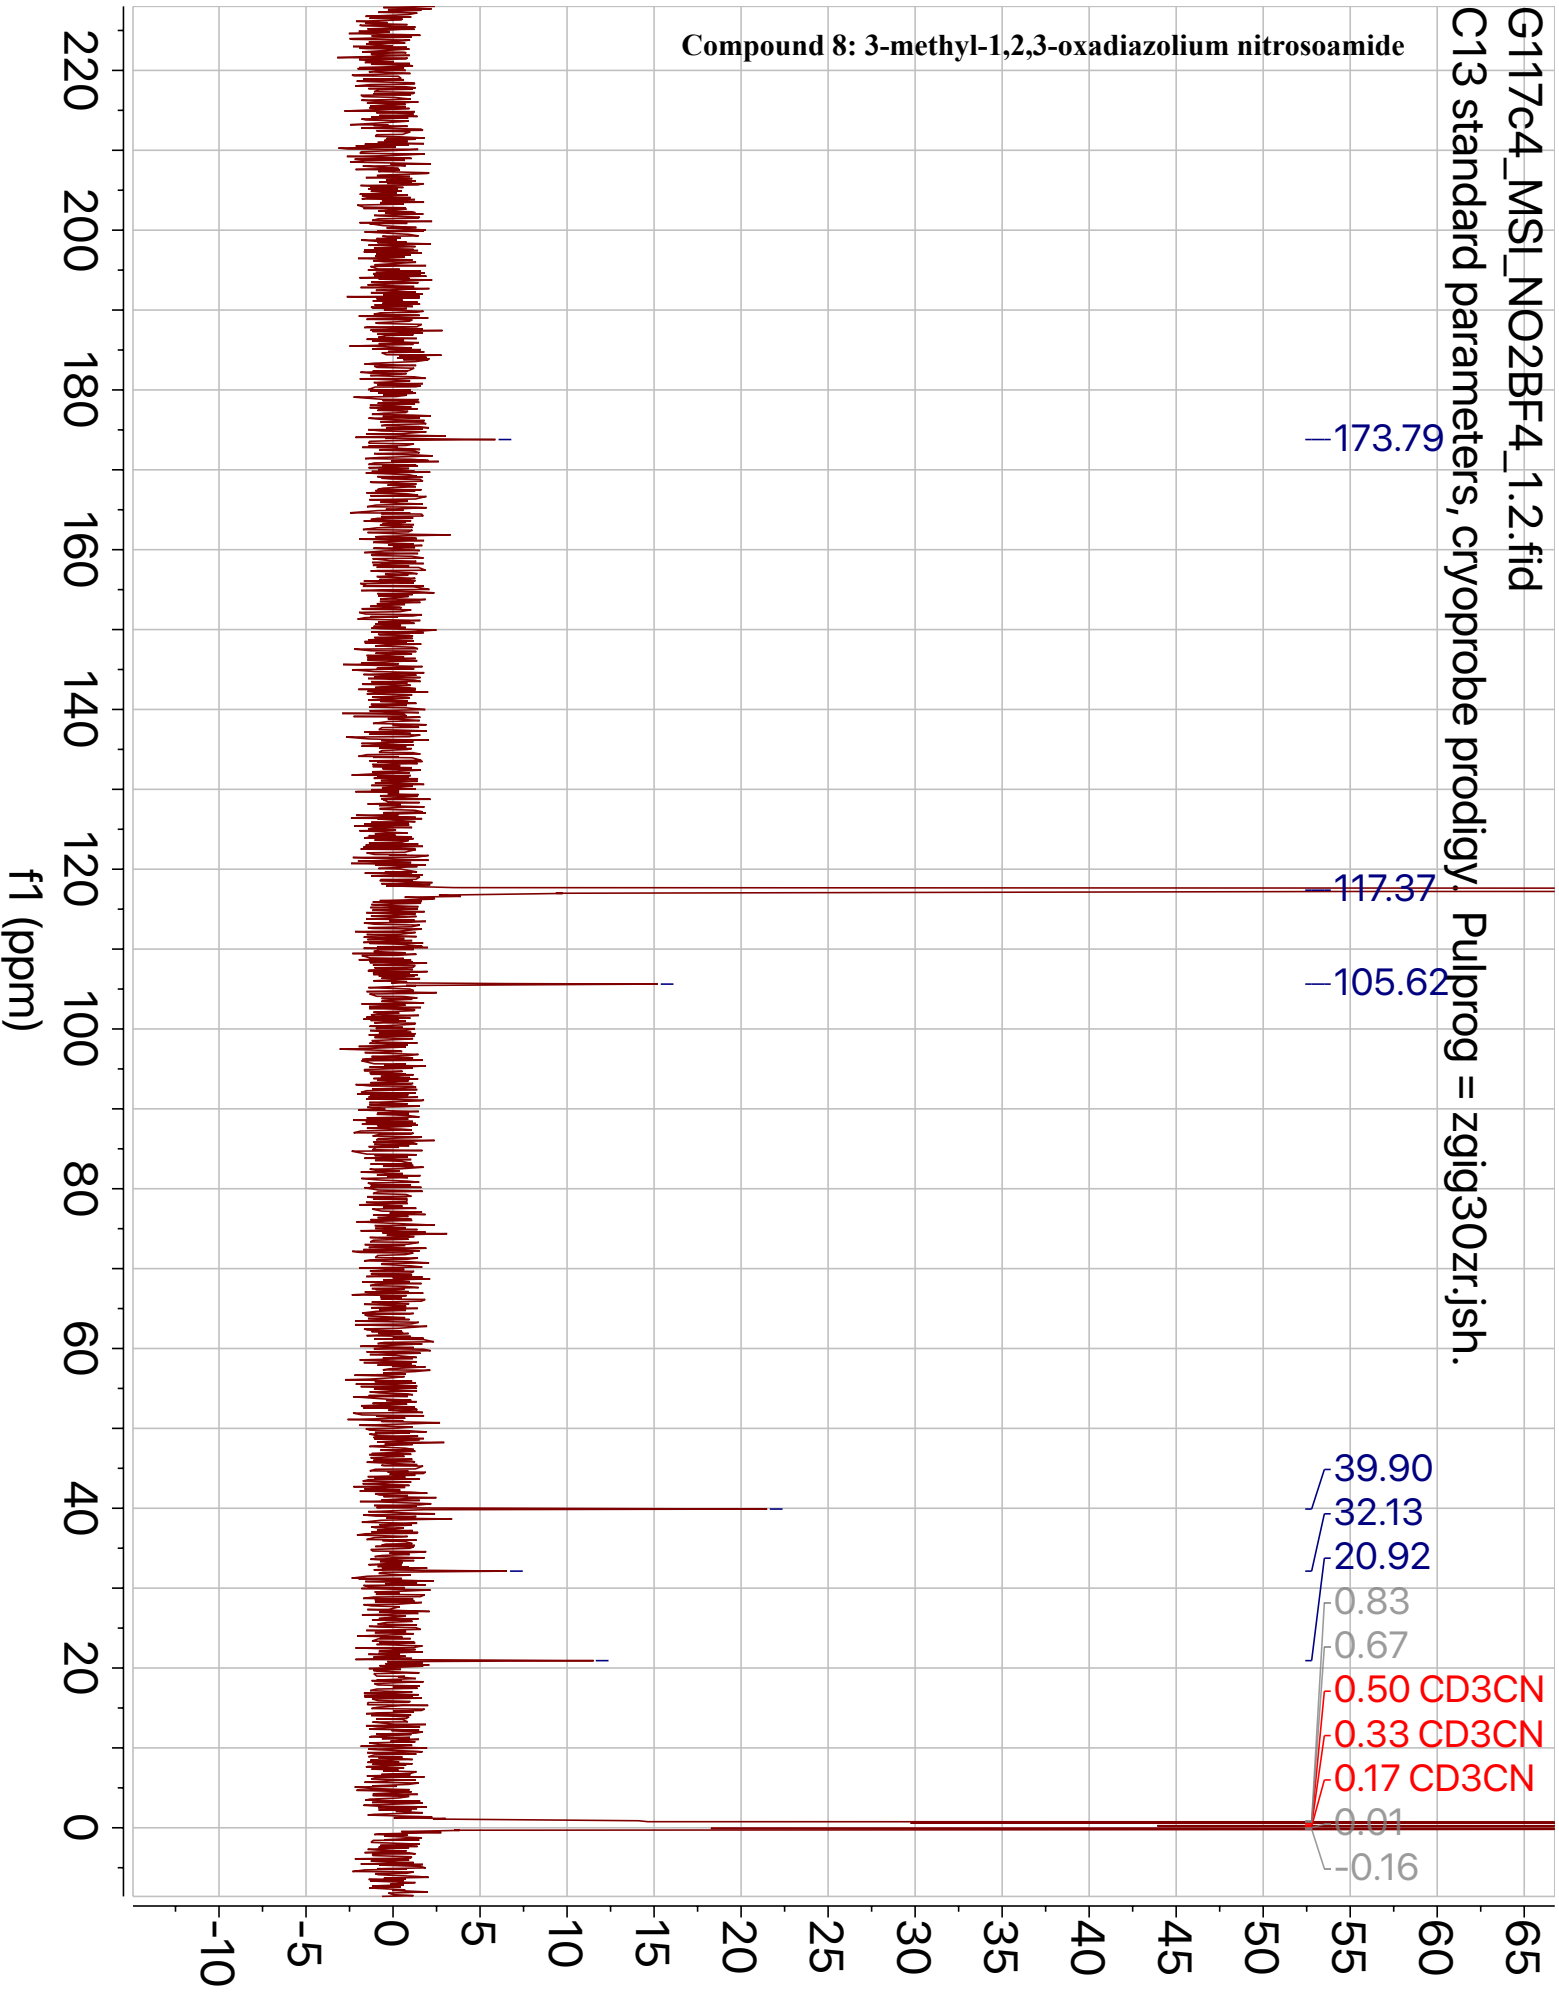

# Compound 2: MSI nitrate

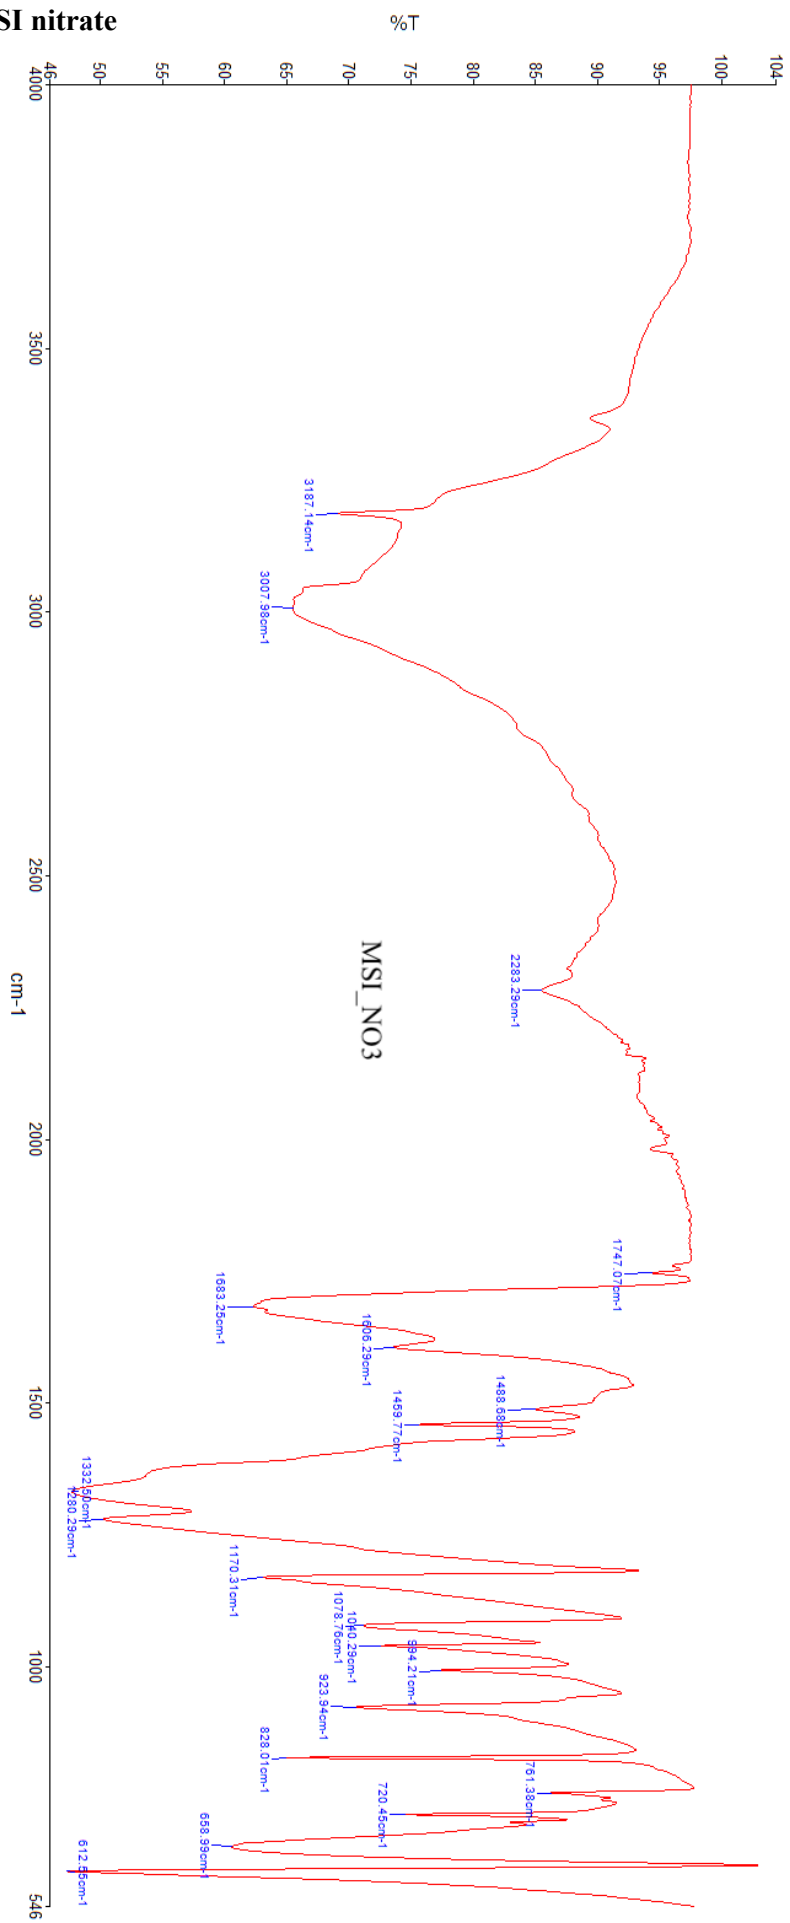

# Compound 3: MSI perchlorate

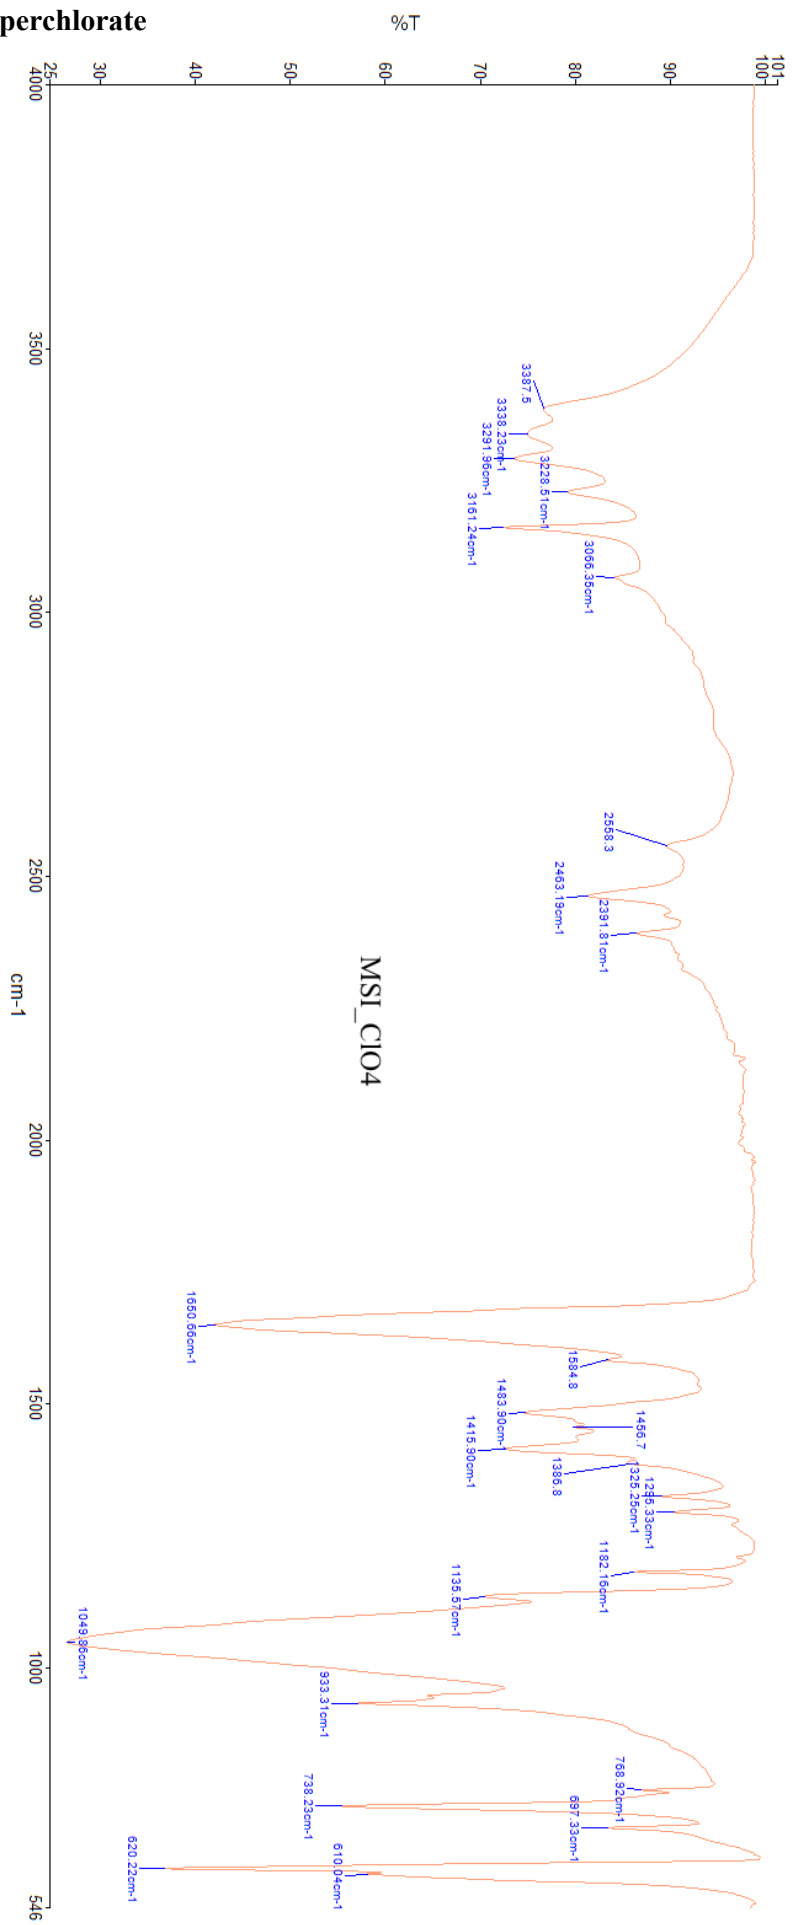

# Compound 4: MSI nitrotetrazole

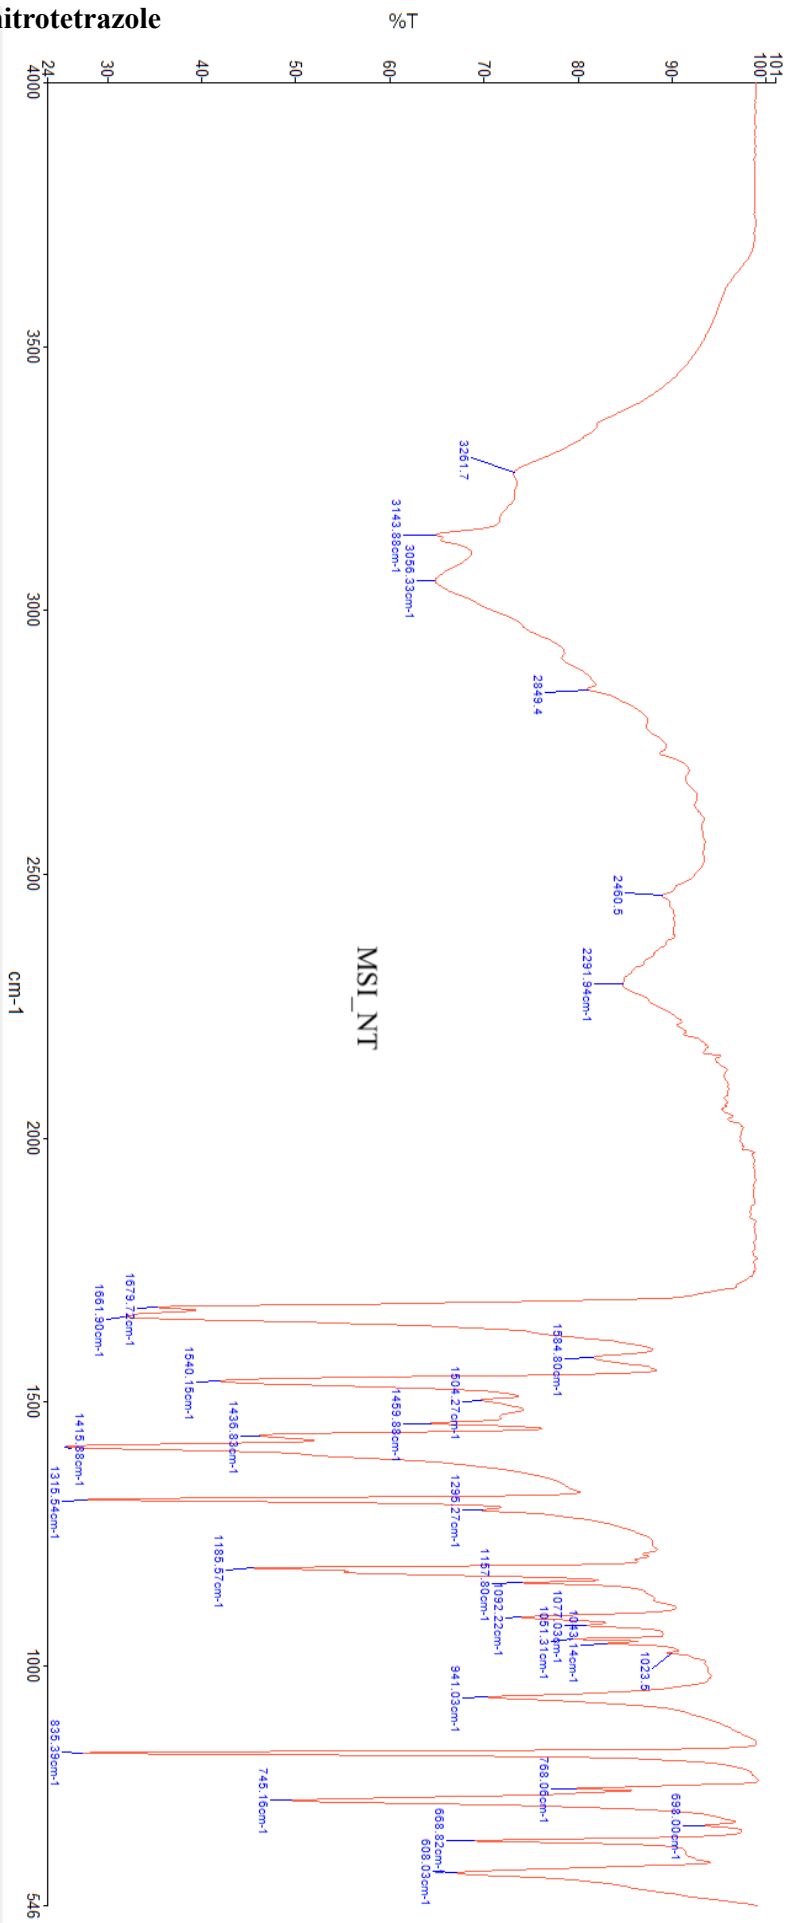



# Compound 5: MSI DNTT

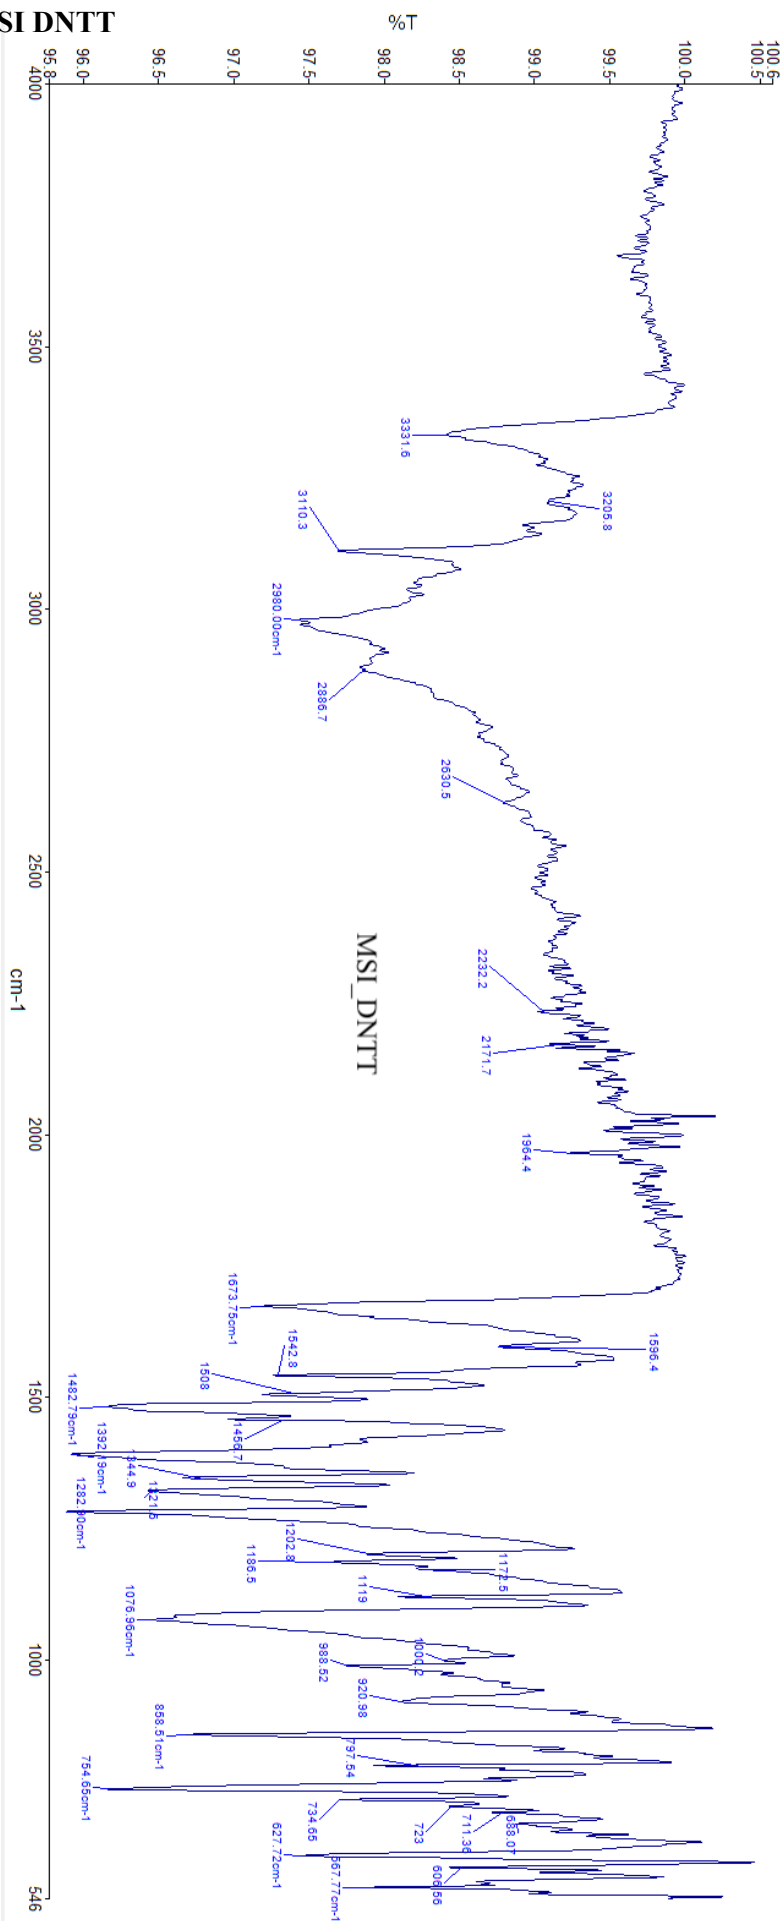

# Compound 6: MSI tetrazole azasydnone

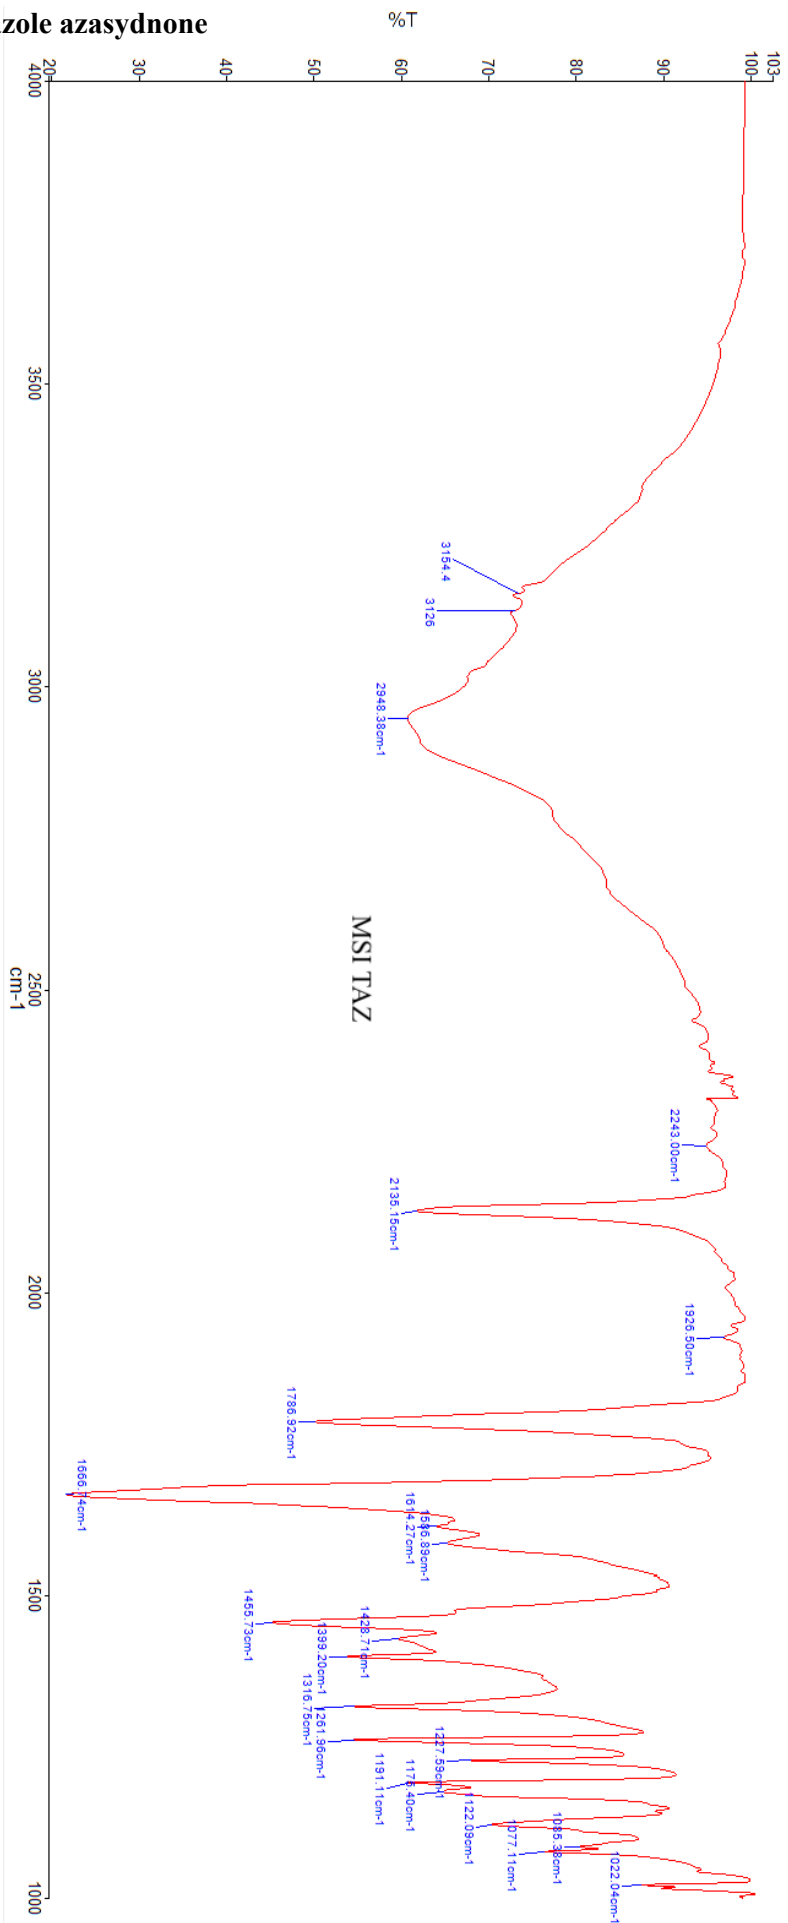

Compound 8: 3-methyl-1,2,3-oxadiazolium nitrosoamide

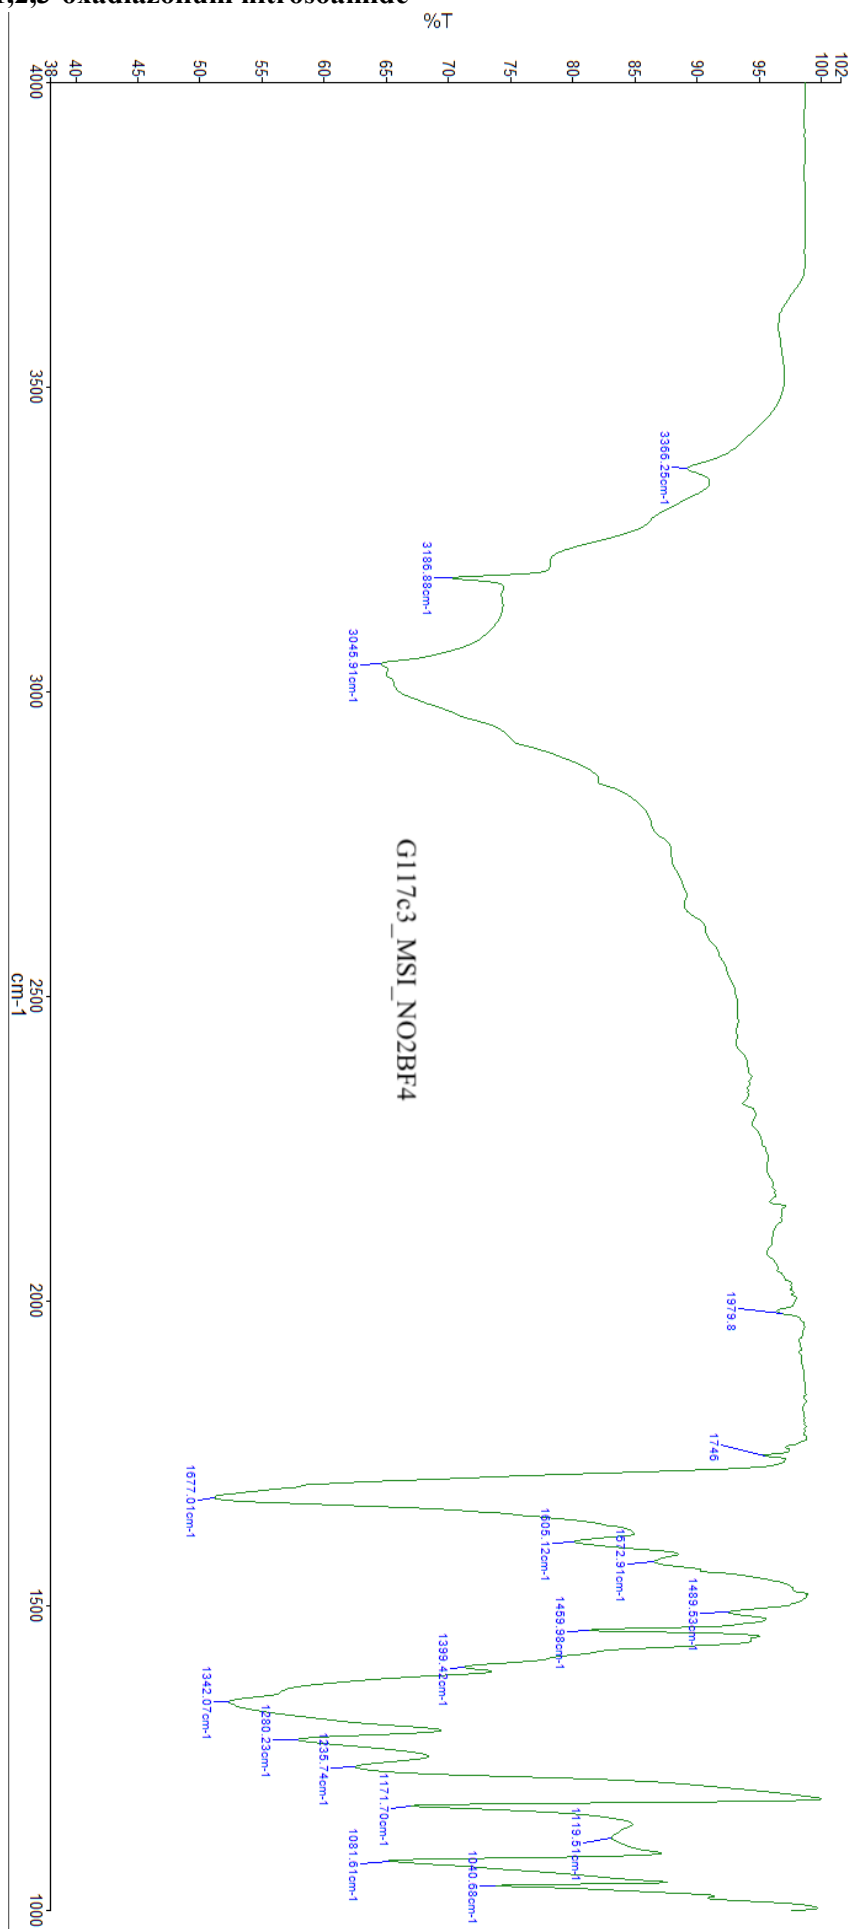

Sample: MSI\_HCl  
Size: 3.0990 mg  
Method: Isotherm for 5min then 10Cmin

# TGA

File: C:\TA\Data\TGA\Gettings\MSI\_HCl.001  
Operator: MG  
Run Date: 07-Dec-2020 10:32  
Instrument: TGA Q50 V20.13 Build 39

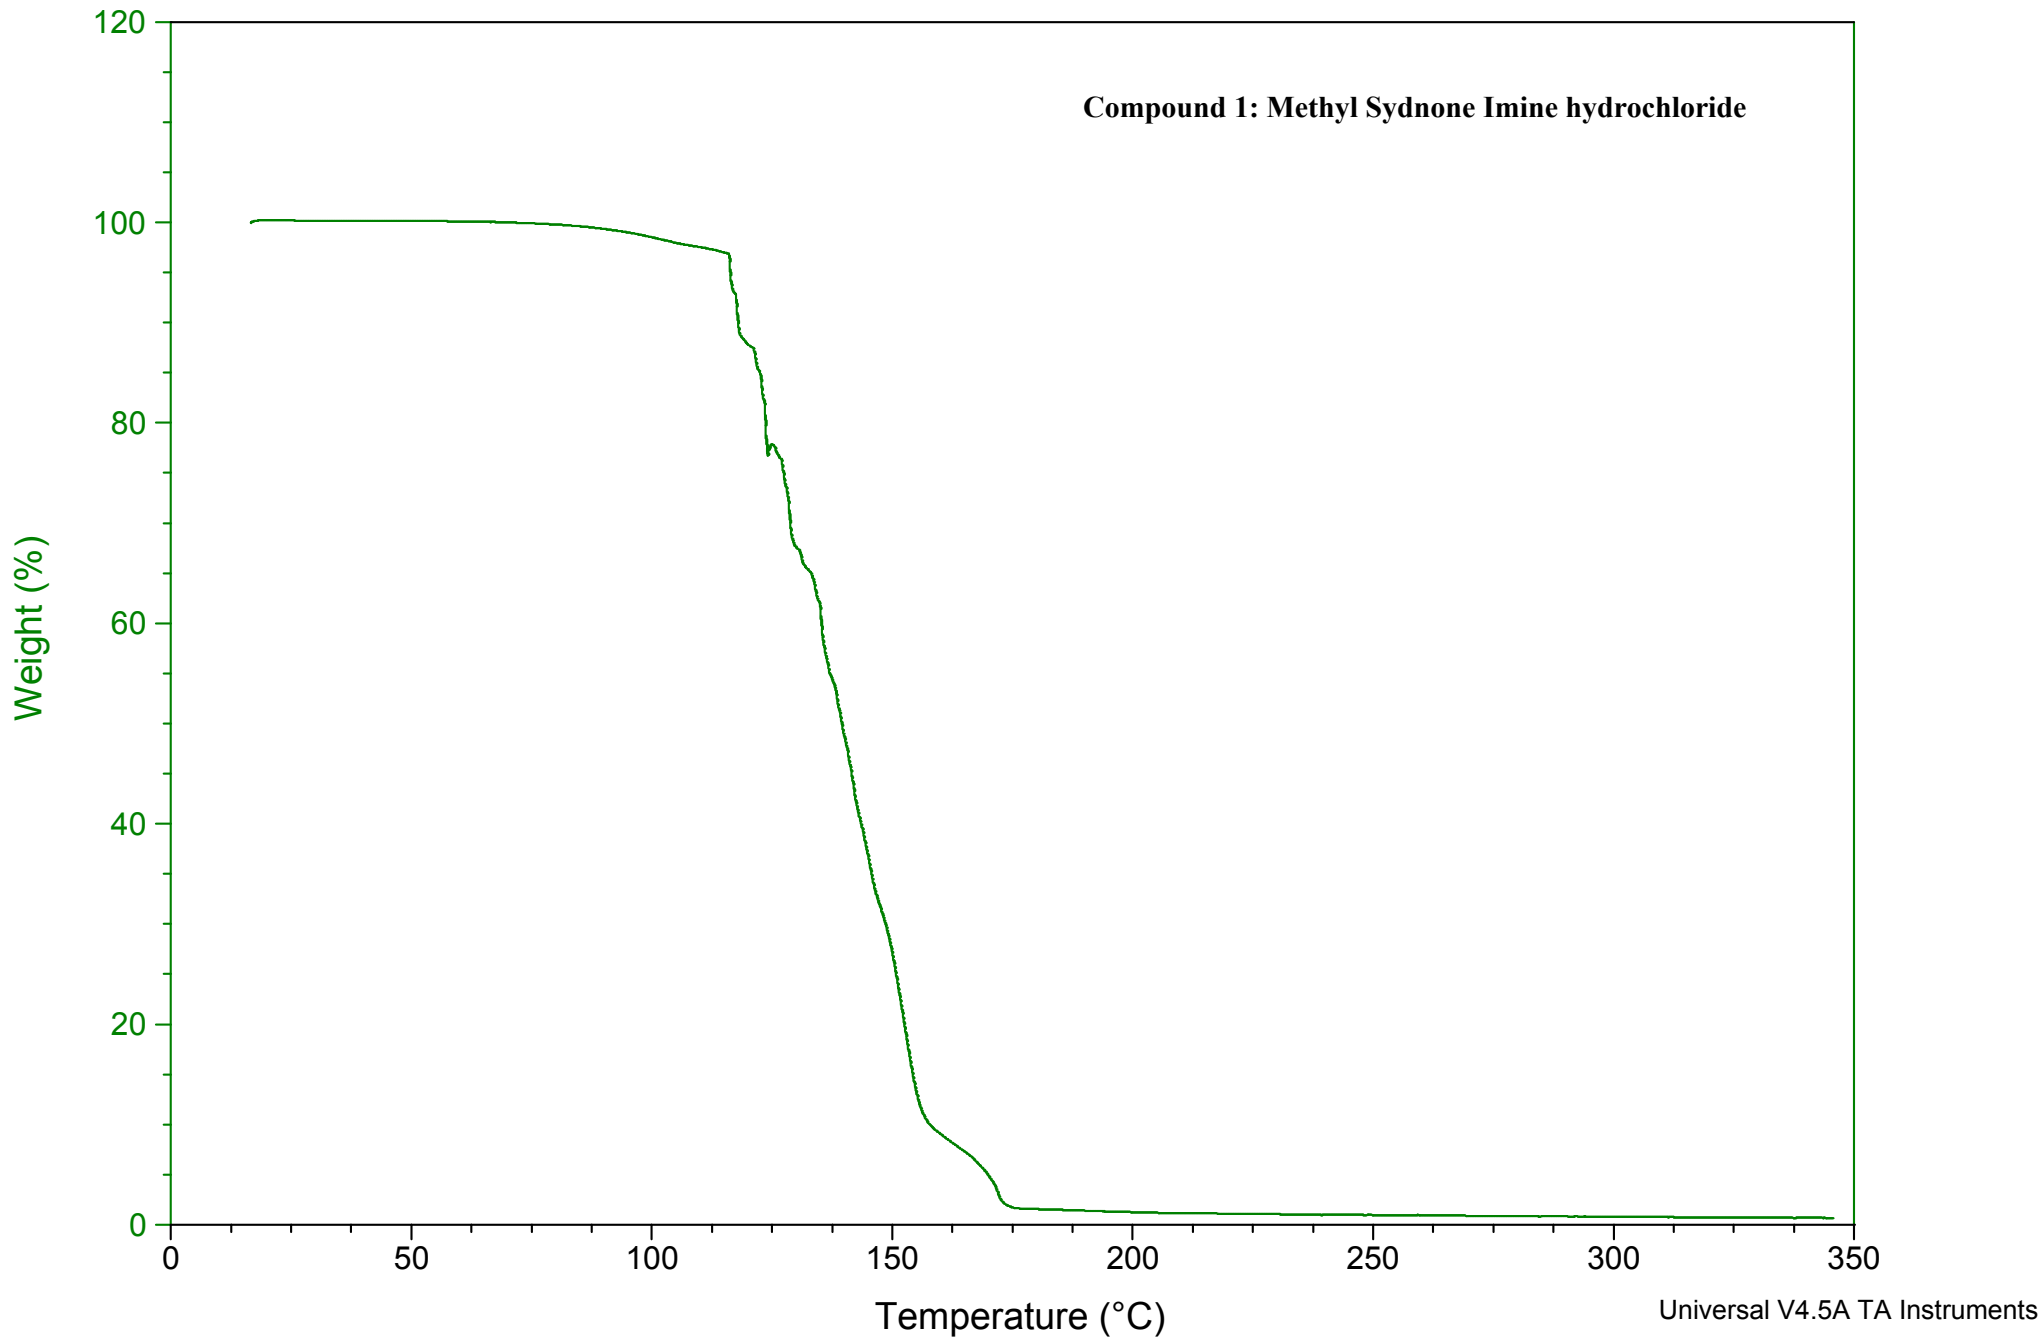

Sample: G117\_MSI\_NO3  
Size: 3.7690 mg  
Method: Gettings Sample Analysis 5Cmin  
Comment: 3.83 mg sample

# DSC-TGA

File: C:\...\SDT\Gettings\MSI\G117\_MSI\_NO3.002  
Operator: MG  
Run Date: 19-Aug-2020 14:59  
Instrument: SDT Q600 V20.9 Build 20

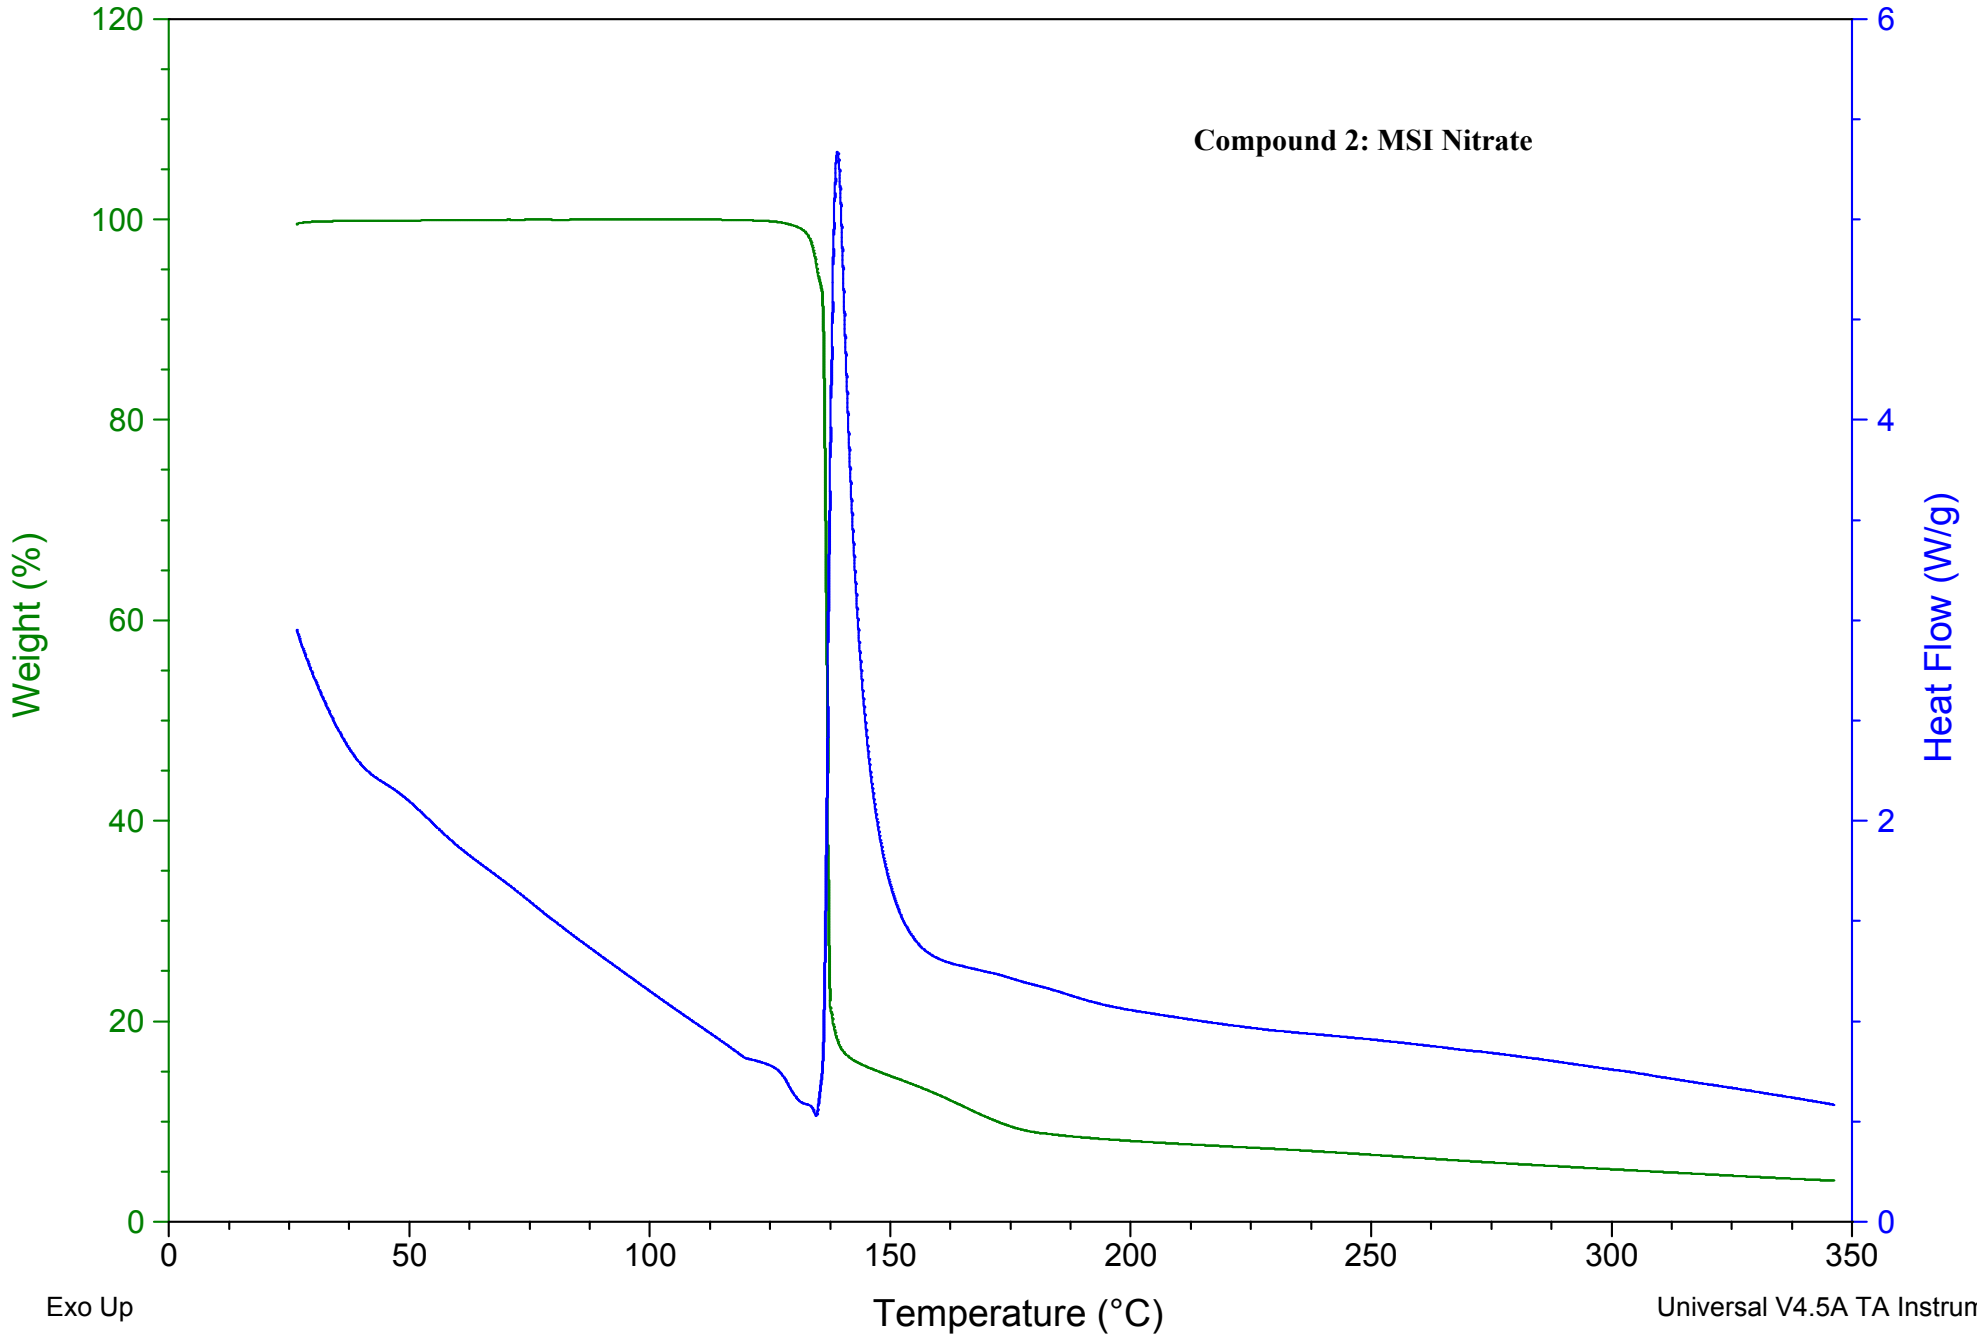

Compound 2: MSI Nitrate

Exo Up

Universal V4.5A TA Instruments

Sample: G117\_MSI\_CIO4  
Size: 3.7850 mg  
Method: Gettings Sample Analysis 5Cmin  
Comment: 3.7 mg sample

# DSC-TGA

File: C:\...\SDT\Gettings\MSI\G117\_MSI\_CIO4.001  
Operator: MG  
Run Date: 19-Aug-2020 19:10  
Instrument: SDT Q600 V20.9 Build 20

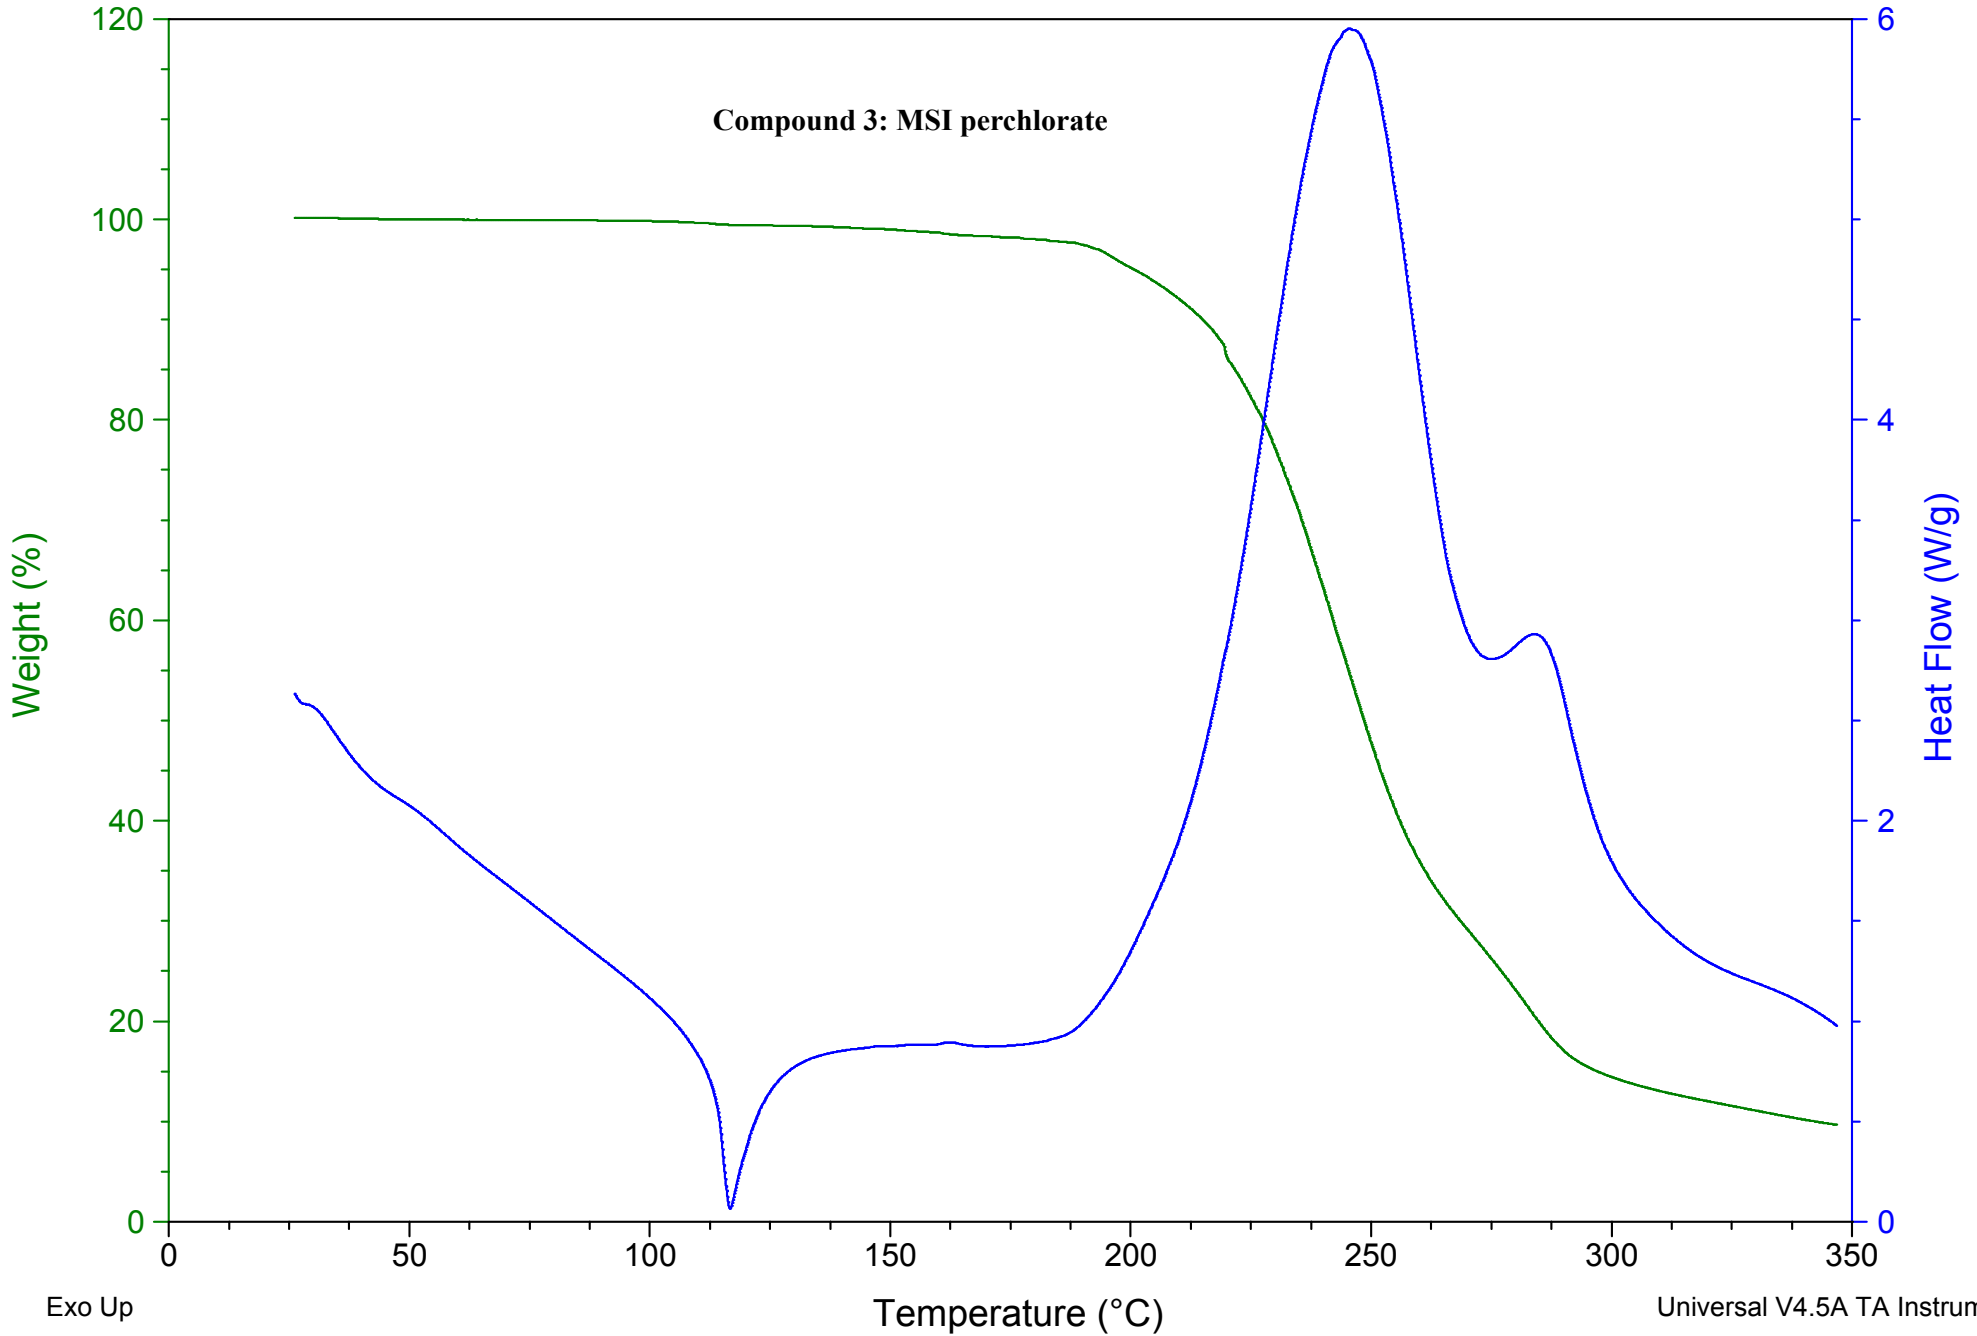

Exo Up

Universal V4.5A TA Instruments

Sample: G117\_MSI\_NT  
Size: 3.6250 mg  
Method: Gettings Sample Analysis 5Cmin  
Comment: 3.95 mg sample

# DSC-TGA

File: C:\...\SDT\Gettings\MSI\G117\_MSI\_NT.002  
Operator: MG  
Run Date: 19-Aug-2020 13:37  
Instrument: SDT Q600 V20.9 Build 20

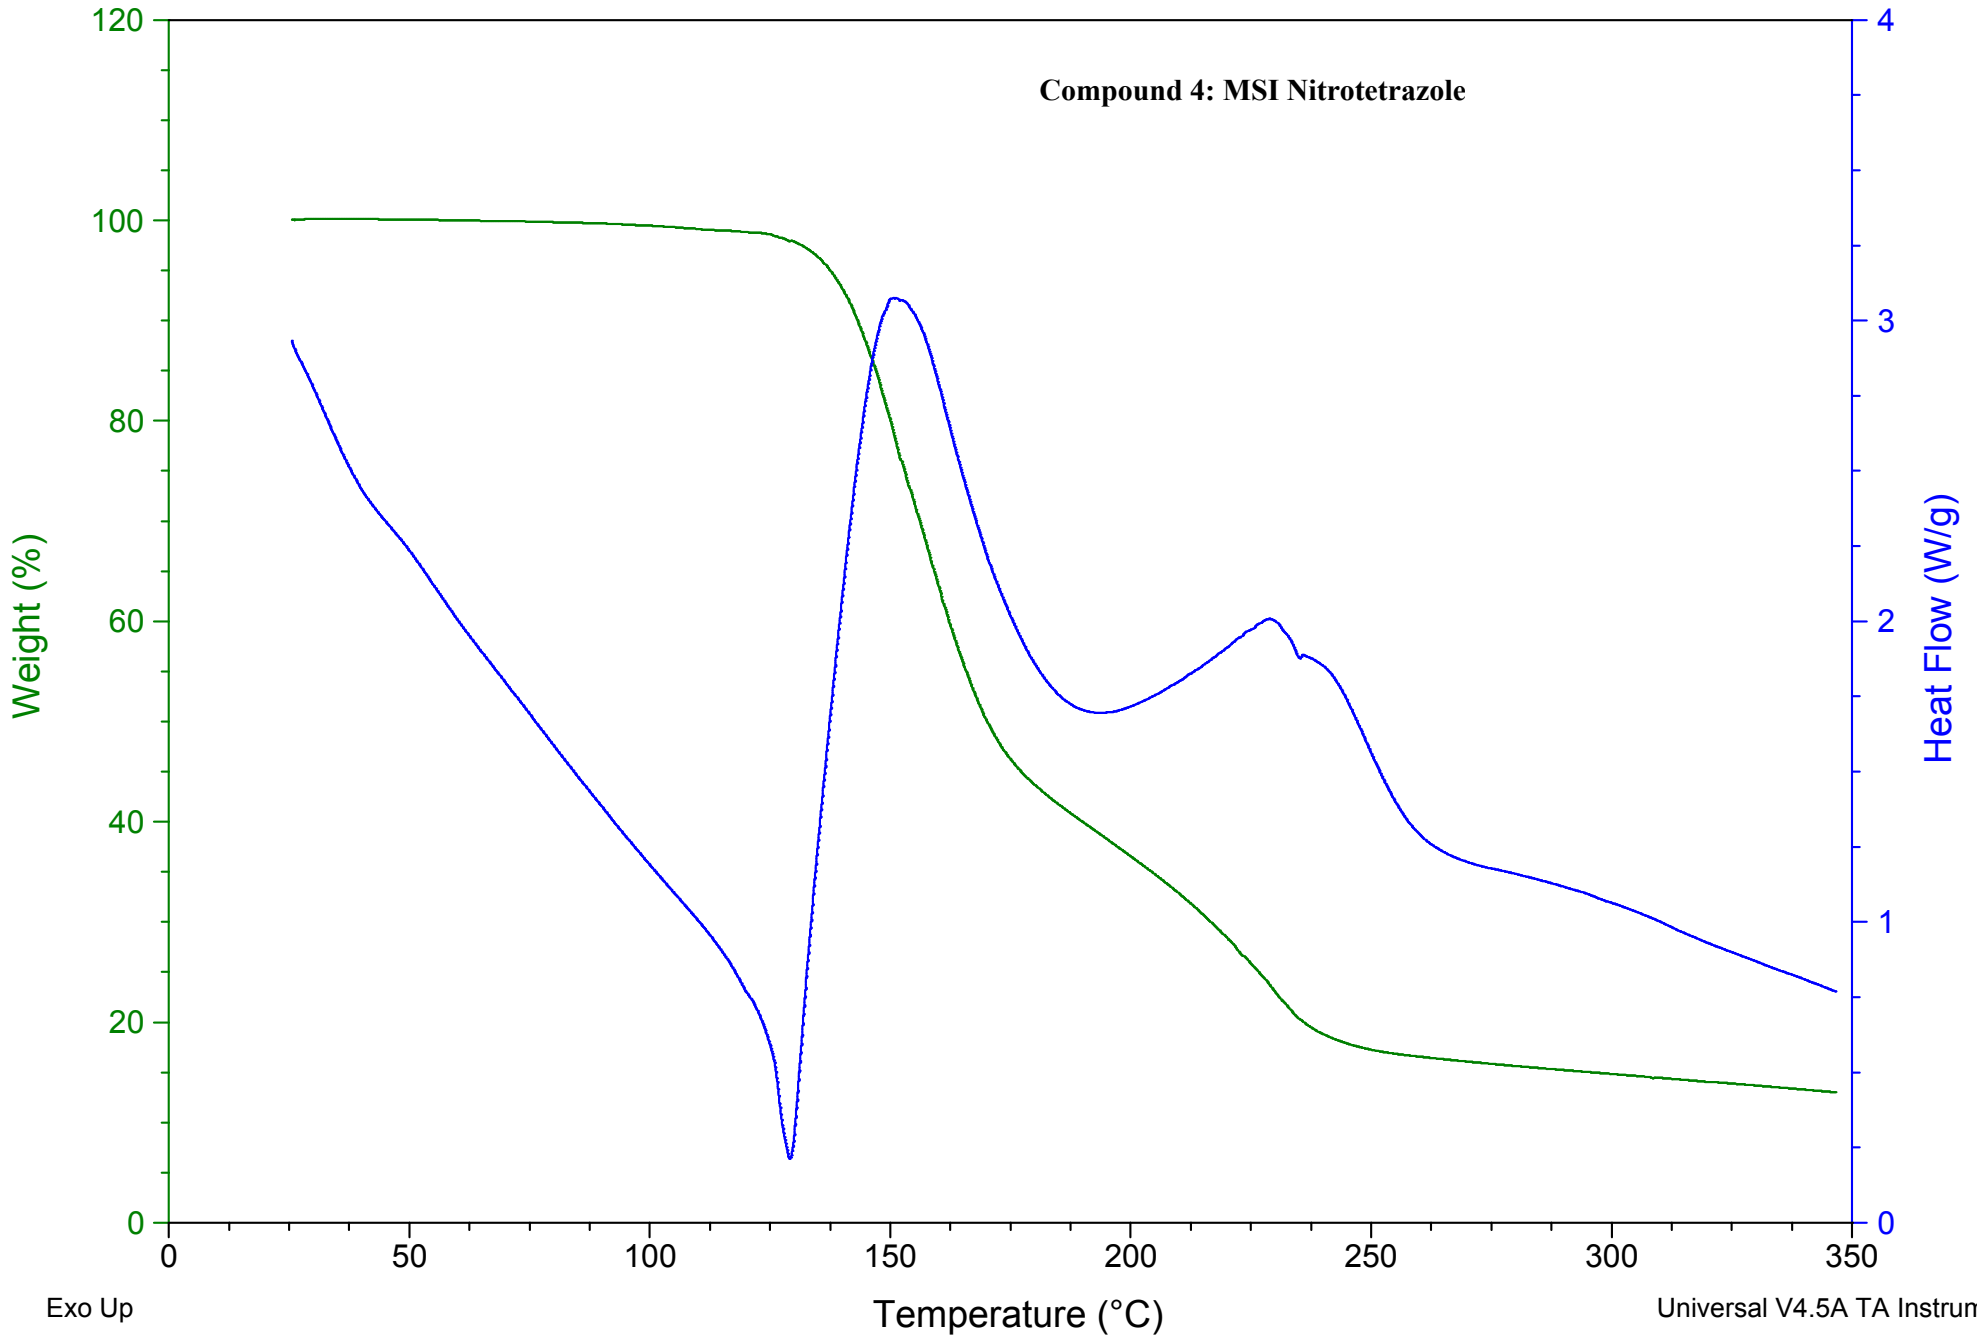

Sample: G117\_MSI\_DNTT  
Size: 4.0800 mg  
Method: Gettings Sample Analysis 5Cmin  
Comment: 3.94 mg sample

# DSC-TGA

File: C:\...\SDT\Gettings\MSI\G117\_MSI\_DNTT.002  
Operator: MG  
Run Date: 19-Aug-2020 11:35  
Instrument: SDT Q600 V20.9 Build 20

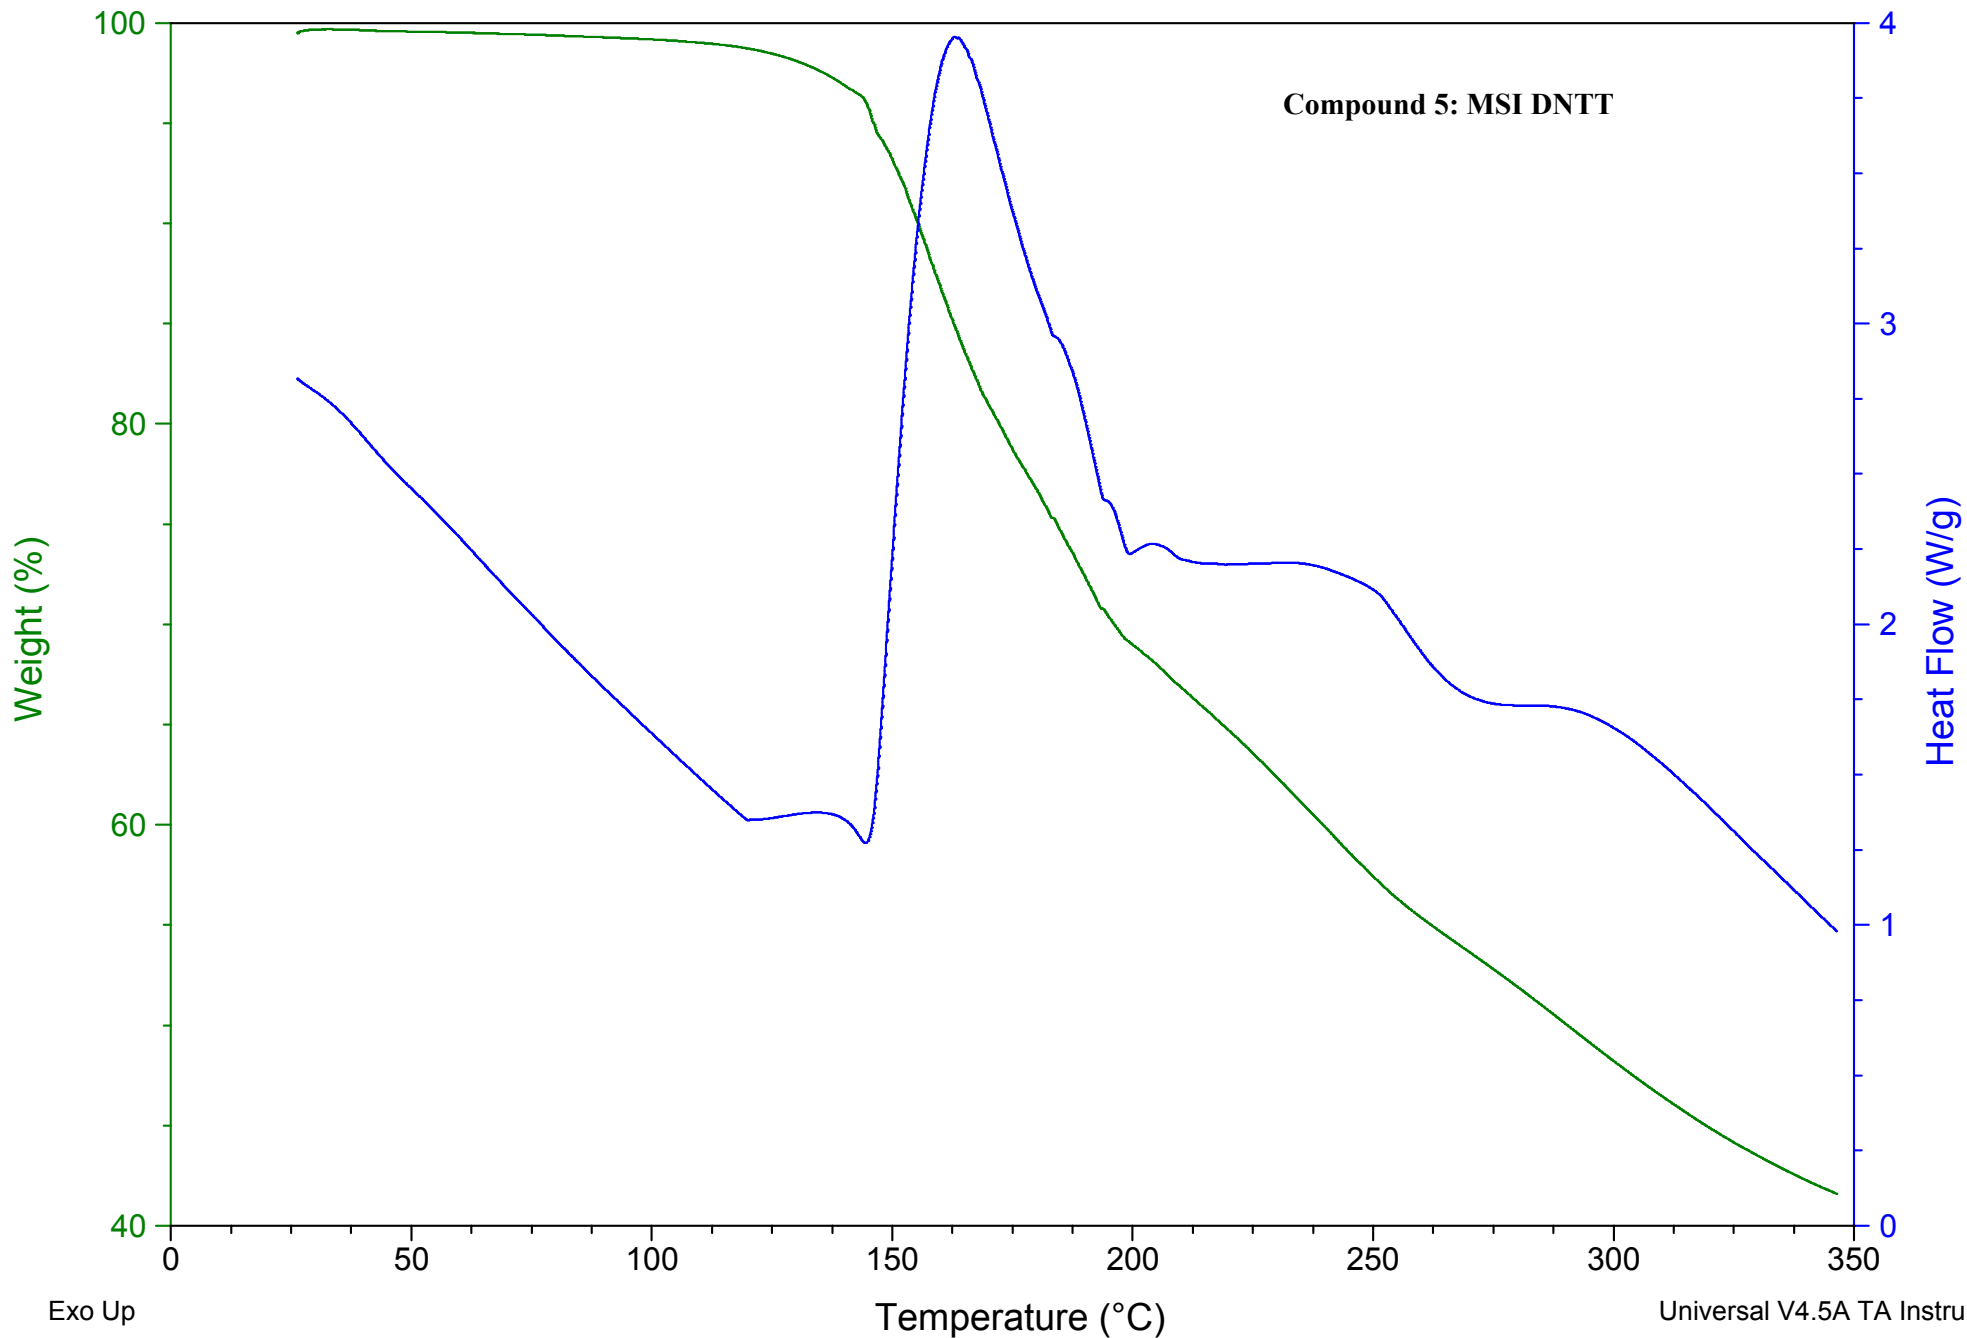

Exo Up

Universal V4.5A TA Instruments



Sample: G117d\_MSI\_TAZ  
Size: 3.8500 mg  
Method: Gettings Sample Analysis 5Cmin  
Comment: mg sample

# DSC-TGA

File: C:\...\SDT\Gettings\MSI\G117d\_MSI\_TAZ.001  
Operator: MG  
Run Date: 13-Sep-2020 17:50  
Instrument: SDT Q600 V20.9 Build 20

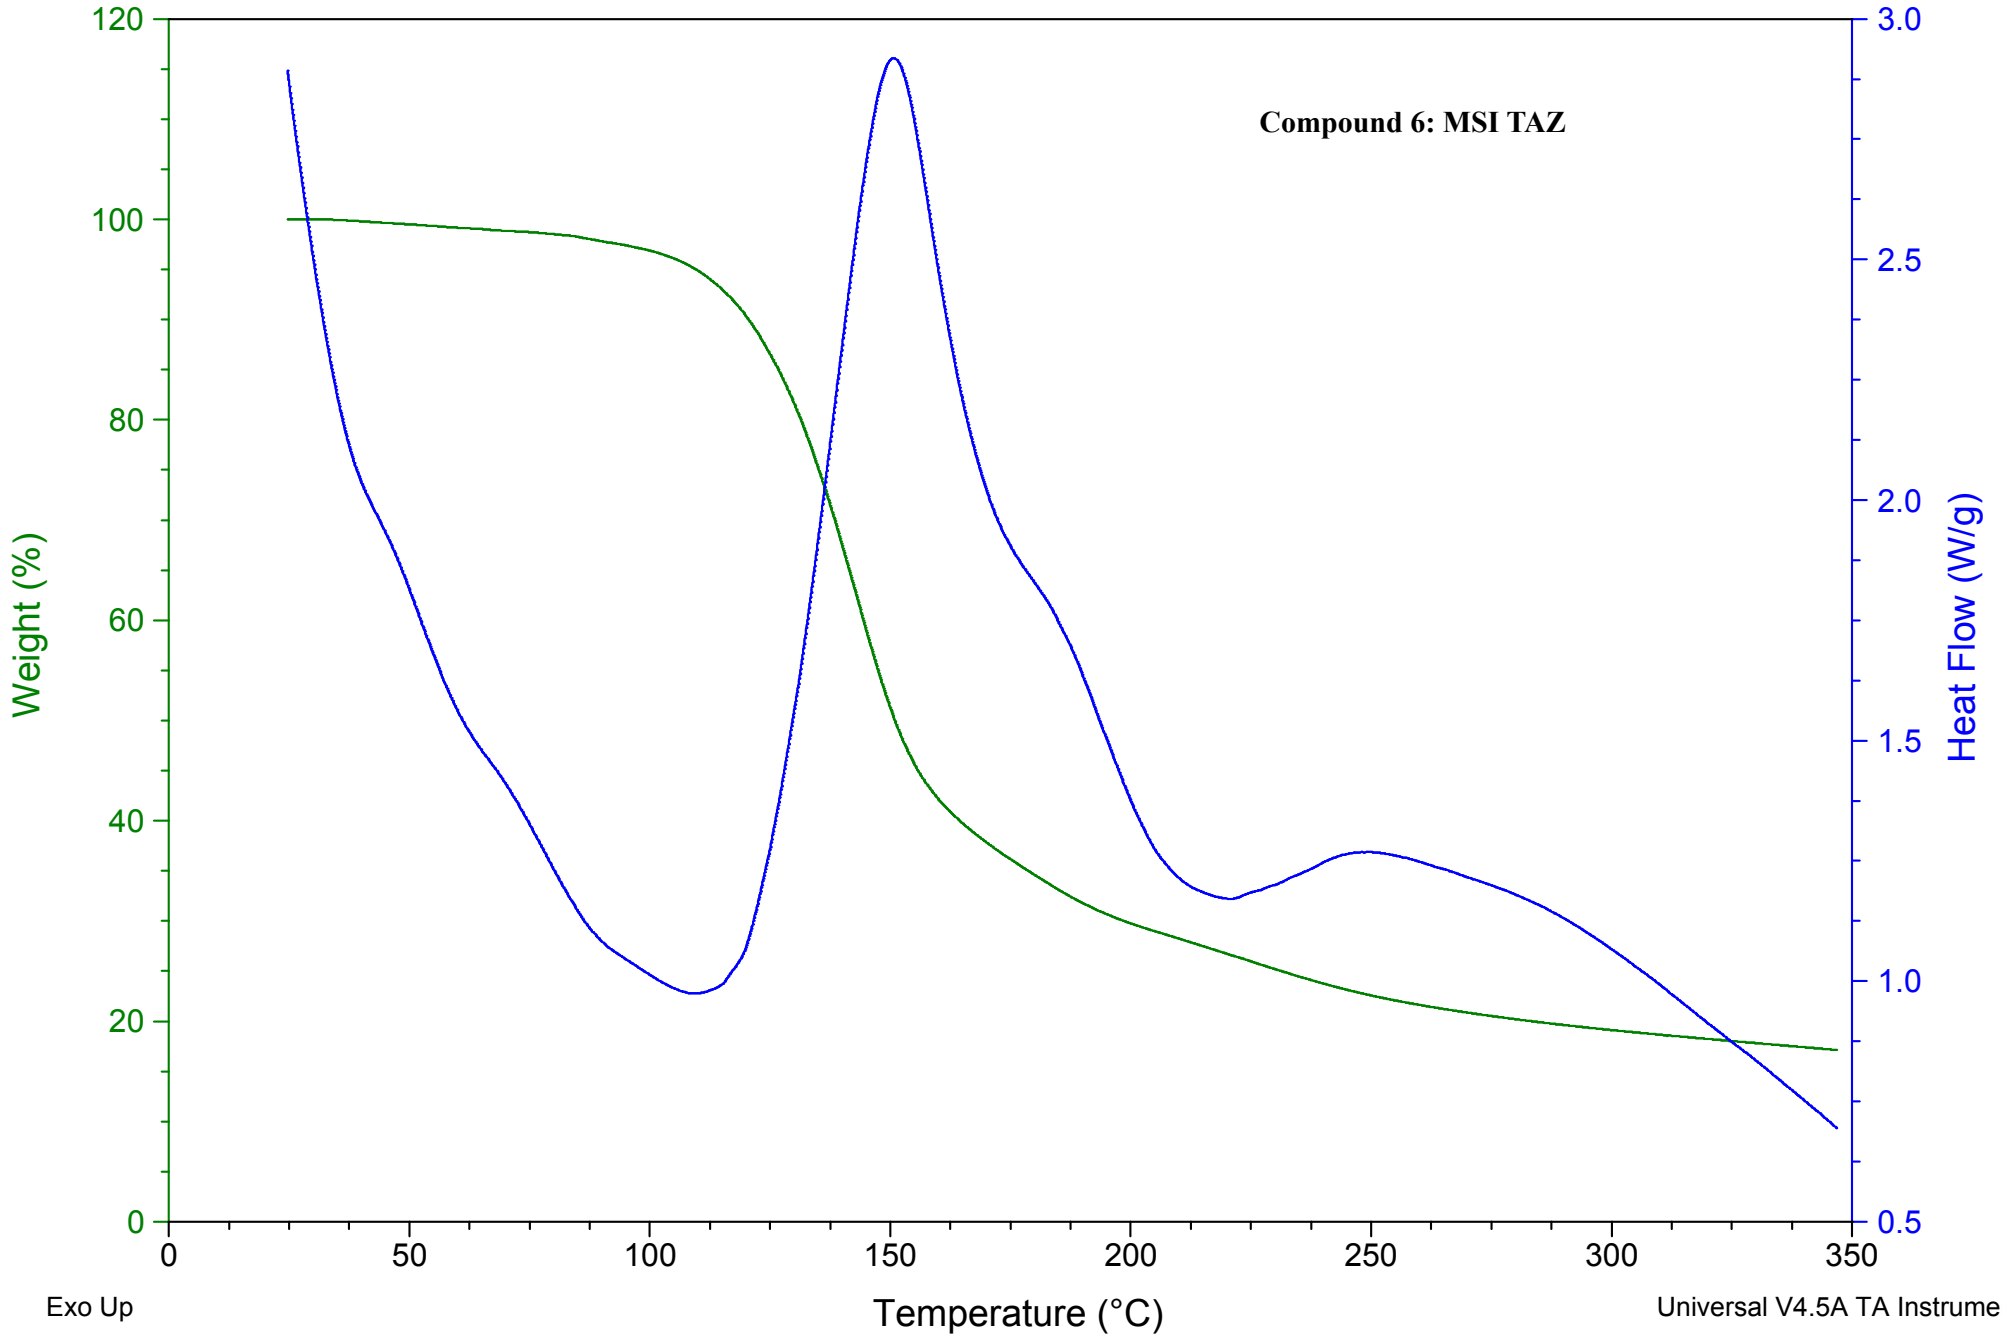

Exo Up

Universal V4.5A TA Instruments

Sample: MSI\_NO2BF4  
Size: 5.3020 mg  
Method: Gettings Sample Analysis 5Cmin  
Comment: 4.9 mg sample

# DSC-TGA

File: C:\...\Gettings\MSI\G117c\_MSI\_NO2BF4.001  
Operator: MG  
Run Date: 23-Sep-2020 17:43  
Instrument: SDT Q600 V20.9 Build 20

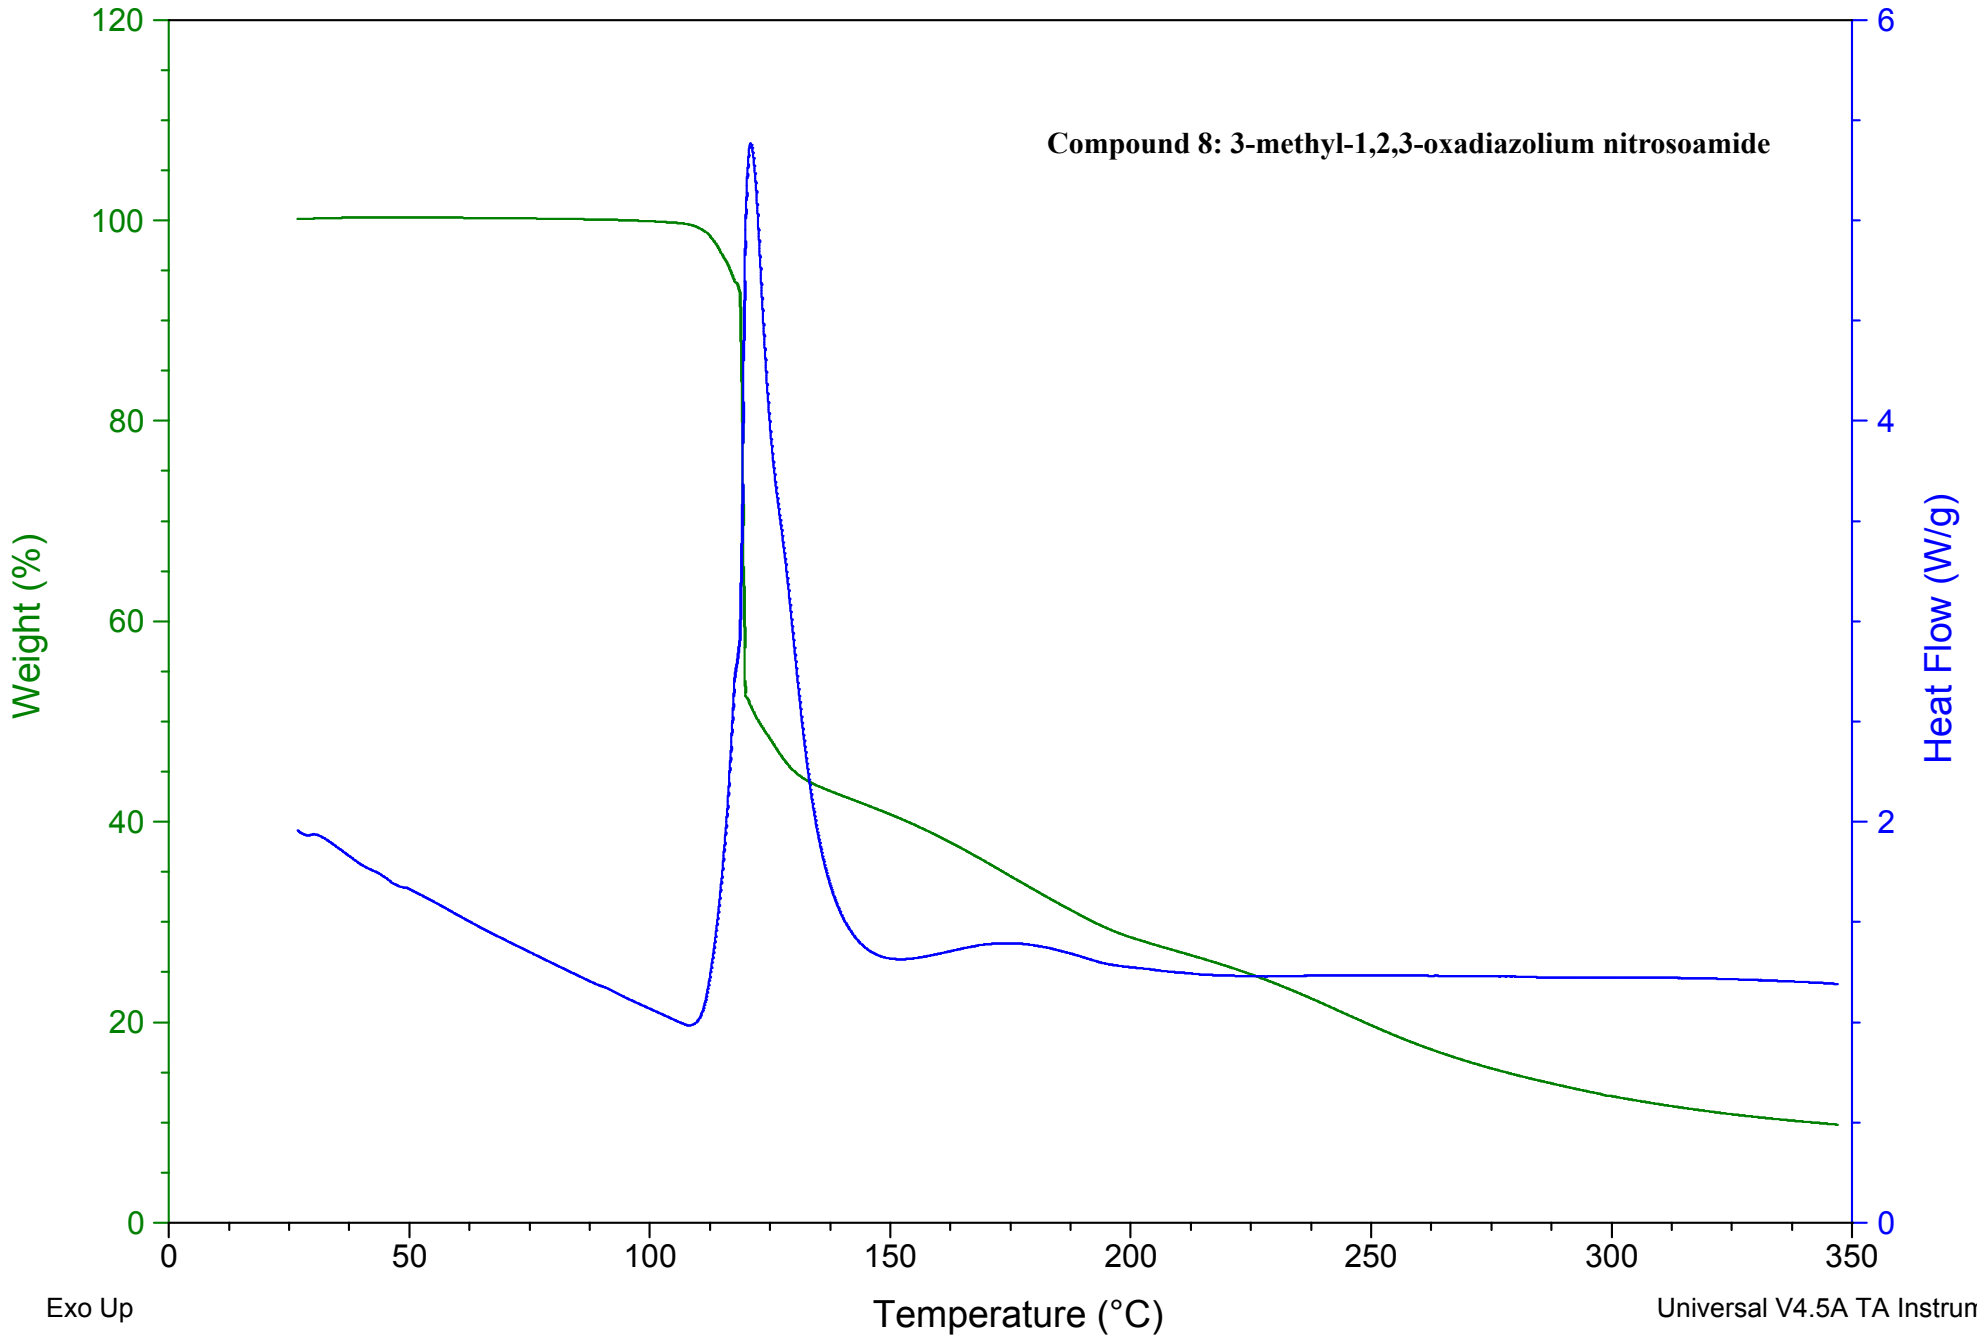

## Compound 2: MSI nitrate

### Compound 2

CCDC-2024994

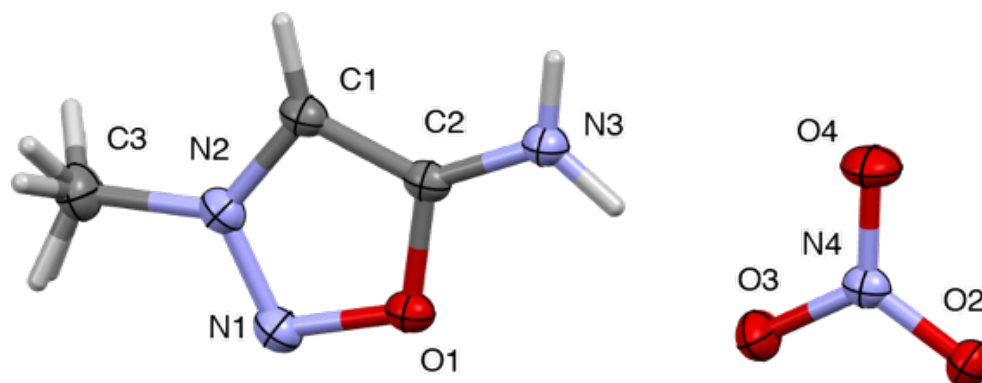

**Fig. 1** Molecular unit of 5-amino-3-methyl-1,2,3-oxadiazolium nitrate (**2**). Ellipsoids are drawn at the 50% probability level. Disorder of methyl H atoms is symmetry imposed by a mirror plane bisecting the cation.

## Title

Matthias Zeller,\* Matthew Gettings and Davin Piercey

Department of Chemistry, Purdue University, 560 Oval Dr., W. Lafayette, IN 47907-2084, USA

Correspondence email: zeller4@purdue.edu

## Abstract

### Table 1

#### Experimental details

##### Crystal data

|                             |                                                                |
|-----------------------------|----------------------------------------------------------------|
| Chemical formula            | C <sub>3</sub> H <sub>6</sub> N <sub>3</sub> O·NO <sub>3</sub> |
| $M_r$                       | 162.12                                                         |
| Crystal system, space group | Monoclinic, $P2_1/m$                                           |
| Temperature (K)             | 150                                                            |
| $a, b, c$ (Å)               | 5.7481 (6), 5.8420 (7), 9.9504 (11)                            |
| $\beta$ (°)                 | 91.390 (5)                                                     |
| $V$ (Å <sup>3</sup> )       | 334.04 (6)                                                     |
| $Z$                         | 2                                                              |
| Radiation type              | Cu $K\alpha$                                                   |
| $\mu$ (mm <sup>-1</sup> )   | 1.31                                                           |
| Crystal size (mm)           | 0.15 × 0.13 × 0.09                                             |

##### Data collection

|                                                                            |                                                                                                                                     |
|----------------------------------------------------------------------------|-------------------------------------------------------------------------------------------------------------------------------------|
| Diffractionmeter                                                           | Bruker AXS D8 Quest diffractometer with PhotonIII_C14 charge-integrating and photon counting pixel array detector                   |
| Absorption correction                                                      | Multi-scan<br><i>SADABS</i> 2016/2: Krause, L., Herbst-Irmer, R., Sheldrick G.M. & Stalke D., <i>J. Appl. Cryst.</i> 48 (2015) 3-10 |
| $T_{\min}$ , $T_{\max}$                                                    | 0.633, 0.754                                                                                                                        |
| No. of measured, independent and observed [ $I > 2\sigma(I)$ ] reflections | 2988, 764, 711                                                                                                                      |
| $R_{\text{int}}$                                                           | 0.033                                                                                                                               |
| $(\sin \theta/\lambda)_{\text{max}}$ (Å <sup>-1</sup> )                    | 0.637                                                                                                                               |

##### Refinement

|                                                                            |                                                                        |
|----------------------------------------------------------------------------|------------------------------------------------------------------------|
| $R[F^2 > 2\sigma(F^2)]$ , $wR(F^2)$ , $S$                                  | 0.036, 0.105, 1.15                                                     |
| No. of reflections                                                         | 764                                                                    |
| No. of parameters                                                          | 72                                                                     |
| H-atom treatment                                                           | H atoms treated by a mixture of independent and constrained refinement |
| $\Delta\rho_{\text{max}}$ , $\Delta\rho_{\text{min}}$ (e Å <sup>-3</sup> ) | 0.19, -0.29                                                            |

Computer programs: Apex3 v2019.1-0 (Bruker, 2019), *SAINTE* V8.40A (Bruker, 2019), *SHELXS97* (Sheldrick, 2008), *SHELXL2018/3* (Sheldrick, 2015, 2018), *SHELXLE* Rev1117 (Hübschle *et al.*, 2011).

**Table 2**

Hydrogen-bond geometry (Å, °)

| <i>D</i> —H··· <i>A</i>   | <i>D</i> —H | H··· <i>A</i> | <i>D</i> ··· <i>A</i> | <i>D</i> —H··· <i>A</i> |
|---------------------------|-------------|---------------|-----------------------|-------------------------|
| N3—H3A···O3               | 0.90 (3)    | 1.90 (3)      | 2.806 (2)             | 180 (2)                 |
| N3—H3B···O2 <sup>i</sup>  | 0.87 (3)    | 2.06 (3)      | 2.905 (2)             | 162 (2)                 |
| N3—H3B···O3 <sup>i</sup>  | 0.87 (3)    | 2.39 (3)      | 3.114 (2)             | 141 (2)                 |
| C1—H1···O3 <sup>i</sup>   | 0.95        | 2.36          | 3.039 (2)             | 128                     |
| C3—H3C···O2 <sup>ii</sup> | 0.98        | 2.37          | 3.260 (3)             | 150                     |

Symmetry codes: (i)  $x-1, y, z$ ; (ii)  $x-1, y, z-1$ .**Acknowledgements**

This material is based upon work supported by the National Science Foundation through the Major Research Instrumentation Program under Grant No. CHE 1625543. (Funding for the single-crystal X-ray diffractometer).

**Funding information****References**

- Allen, F. H., Johnson, O., Shields, G. P., Smith, B. R. & Towler, M. (2004). *J. Appl. Cryst.*, **37**, 335–338.
- Bruker (2019). Apex3 v2019.1-0, *SAINT* V8.40A, Bruker Nano Inc.: Madison (WI), USA, 2019.
- CSD: Groom, C. R. & Allen, F. H. (2014). *Angew. Chem. Int. Ed.*, **53**, 662–671.
- Hübschle, C. B., Sheldrick, G. M. & Dittrich, B. (2011). *J. Appl. Cryst.*, **44**, 1281–1284.
- publCIF*: Westrip, S. P. (2010). *J. Appl. Cryst.*, **43**, 920–925.
- Sheldrick, G. M. (2008). *Acta Cryst.*, **A64**, 112–122.
- Sheldrick, G. M. (2012). *TWINABS*. Ver. 2012/1.
- Sheldrick, G. M. (2015). "Crystal structure refinement with *SHELXL*", *Acta Cryst.*, **C71**, 3–8.
- Sheldrick, G. M. (2015). "*SHELXT*—Integrated space-group and crystal-structure determination", *Acta Cryst.* **A71**, 3–8.
- Sheldrick, G. M. (2018). *SHELXL2018*. University of Göttingen, Germany.
- Spek, A. L. (2003). *J. Appl. Cryst.*, **36**, 7–13.

**Figure 1**

## supporting information

## Title

## Computing details

Data collection: Apex3 v2019.1-0 (Bruker, 2019); cell refinement: *SAINT* V8.40A (Bruker, 2019); data reduction: *SAINT* V8.40A (Bruker, 2019); program(s) used to solve structure: *SHELXS97* (Sheldrick, 2008); program(s) used to refine structure: *SHELXL2018/3* (Sheldrick, 2015, 2018), *SHELXLE* Rev1117 (Hübschle *et al.*, 2011).

## (G117\_MSI\_NO3\_0m)

## Crystal data

$\text{C}_3\text{H}_6\text{N}_3\text{O}\cdot\text{NO}_3$

$M_r = 162.12$

Monoclinic,  $P2_1/m$

$a = 5.7481$  (6) Å

$b = 5.8420$  (7) Å

$c = 9.9504$  (11) Å

$\beta = 91.390$  (5)°

$V = 334.04$  (6) Å<sup>3</sup>

$Z = 2$

$F(000) = 168$

$D_x = 1.612$  Mg m<sup>-3</sup>

Cu  $K\alpha$  radiation,  $\lambda = 1.54178$  Å

Cell parameters from 2359 reflections

$\theta = 7.7\text{--}79.0^\circ$

$\mu = 1.31$  mm<sup>-1</sup>

$T = 150$  K

Block, colourless

0.15 × 0.13 × 0.09 mm

## Data collection

Bruker AXS D8 Quest

diffractometer with PhotonIII\_C14 charge-integrating  
and photon counting pixel array detector

Radiation source: I-mu-S microsource X-ray tube

Laterally graded multilayer (Goebel) mirror

monochromator

Detector resolution: 7.4074 pixels mm<sup>-1</sup>

$\omega$  and  $\phi$  scans

Absorption correction: multi-scan

*SADABS* 2016/2: Krause, L., Herbst-Irmer, R.,  
Sheldrick G.M. & Stalke D., *J. Appl. Cryst.* 48 (2015)  
3-10

$T_{\min} = 0.633$ ,  $T_{\max} = 0.754$

2988 measured reflections

764 independent reflections

711 reflections with  $I > 2\sigma(I)$

$R_{\text{int}} = 0.033$

$\theta_{\max} = 79.3^\circ$ ,  $\theta_{\min} = 7.7^\circ$

$h = -7 \rightarrow 6$

$k = -7 \rightarrow 7$

$l = -12 \rightarrow 12$

## Refinement

Refinement on  $F^2$

Least-squares matrix: full

$R[F^2 > 2\sigma(F^2)] = 0.036$

$wR(F^2) = 0.105$

$S = 1.15$

764 reflections

72 parameters

0 restraints

Primary atom site location: structure-invariant direct  
methods

Secondary atom site location: difference Fourier map

Hydrogen site location: mixed

H atoms treated by a mixture of independent and  
constrained refinement

$w = 1/[\sigma^2(F_o^2) + (0.0538P)^2 + 0.0917P]$

where  $P = (F_o^2 + 2F_c^2)/3$

$(\Delta/\sigma)_{\max} = 0.002$

$\Delta\rho_{\max} = 0.19$  e Å<sup>-3</sup>

$\Delta\rho_{\min} = -0.29$  e Å<sup>-3</sup>

*Special details*

*Geometry.* All e.s.d.'s (except the e.s.d. in the dihedral angle between two l.s. planes) are estimated using the full covariance matrix. The cell e.s.d.'s are taken into account individually in the estimation of e.s.d.'s in distances, angles and torsion angles; correlations between e.s.d.'s in cell parameters are only used when they are defined by crystal symmetry. An approximate (isotropic) treatment of cell e.s.d.'s is used for estimating e.s.d.'s involving l.s. planes.

*Refinement.* Positions of amine H atoms were freely refined.

*Fractional atomic coordinates and isotropic or equivalent isotropic displacement parameters ( $\text{\AA}^2$ )*

|     | x           | y        | z            | $U_{\text{iso}}^*/U_{\text{eq}}$ | Occ. (<1) |
|-----|-------------|----------|--------------|----------------------------------|-----------|
| O1  | 0.2439 (2)  | 0.250000 | 0.29026 (13) | 0.0223 (3)                       |           |
| O2  | 0.8631 (2)  | 0.250000 | 0.75147 (13) | 0.0242 (4)                       |           |
| O3  | 0.6183 (2)  | 0.250000 | 0.58335 (14) | 0.0335 (4)                       |           |
| O4  | 0.4914 (3)  | 0.250000 | 0.78635 (15) | 0.0339 (4)                       |           |
| N1  | 0.1396 (3)  | 0.250000 | 0.16287 (16) | 0.0240 (4)                       |           |
| N2  | -0.0807 (3) | 0.250000 | 0.18624 (15) | 0.0218 (4)                       |           |
| N3  | 0.1429 (3)  | 0.250000 | 0.51217 (16) | 0.0225 (4)                       |           |
| H3A | 0.296 (5)   | 0.250000 | 0.535 (2)    | 0.027*                           |           |
| H3B | 0.033 (4)   | 0.250000 | 0.571 (3)    | 0.027*                           |           |
| N4  | 0.6555 (3)  | 0.250000 | 0.70870 (16) | 0.0207 (4)                       |           |
| C1  | -0.1347 (3) | 0.250000 | 0.31674 (18) | 0.0220 (4)                       |           |
| H1  | -0.285332   | 0.250000 | 0.353916     | 0.026*                           |           |
| C2  | 0.0778 (3)  | 0.250000 | 0.38510 (17) | 0.0192 (4)                       |           |
| C3  | -0.2472 (4) | 0.250000 | 0.0713 (2)   | 0.0325 (5)                       |           |
| H3C | -0.164420   | 0.217972 | -0.011556    | 0.049*                           | 0.5       |
| H3D | -0.322587   | 0.400144 | 0.064226     | 0.049*                           | 0.5       |
| H3E | -0.365475   | 0.131884 | 0.084774     | 0.049*                           | 0.5       |

*Atomic displacement parameters ( $\text{\AA}^2$ )*

|    | $U^{11}$    | $U^{22}$    | $U^{33}$   | $U^{12}$ | $U^{13}$    | $U^{23}$ |
|----|-------------|-------------|------------|----------|-------------|----------|
| O1 | 0.0212 (7)  | 0.0245 (7)  | 0.0215 (7) | 0.000    | 0.0047 (5)  | 0.000    |
| O2 | 0.0196 (7)  | 0.0281 (7)  | 0.0248 (7) | 0.000    | -0.0023 (5) | 0.000    |
| O3 | 0.0252 (8)  | 0.0580 (10) | 0.0173 (7) | 0.000    | -0.0012 (5) | 0.000    |
| O4 | 0.0252 (8)  | 0.0481 (9)  | 0.0289 (8) | 0.000    | 0.0110 (6)  | 0.000    |
| N1 | 0.0263 (8)  | 0.0267 (8)  | 0.0191 (7) | 0.000    | 0.0033 (6)  | 0.000    |
| N2 | 0.0248 (9)  | 0.0216 (7)  | 0.0190 (8) | 0.000    | 0.0017 (6)  | 0.000    |
| N3 | 0.0199 (8)  | 0.0277 (8)  | 0.0200 (8) | 0.000    | 0.0025 (6)  | 0.000    |
| N4 | 0.0213 (8)  | 0.0196 (7)  | 0.0213 (7) | 0.000    | 0.0036 (6)  | 0.000    |
| C1 | 0.0219 (9)  | 0.0241 (8)  | 0.0200 (9) | 0.000    | 0.0042 (7)  | 0.000    |
| C2 | 0.0207 (9)  | 0.0171 (8)  | 0.0200 (9) | 0.000    | 0.0039 (7)  | 0.000    |
| C3 | 0.0325 (11) | 0.0434 (12) | 0.0213 (9) | 0.000    | -0.0038 (8) | 0.000    |

*Geometric parameters ( $\text{\AA}$ ,  $^\circ$ )*

|       |           |                     |            |
|-------|-----------|---------------------|------------|
| O1—C2 | 1.359 (2) | N3—H3B              | 0.87 (3)   |
| O1—N1 | 1.389 (2) | C1—C2               | 1.383 (3)  |
| O2—N4 | 1.257 (2) | C1—H1               | 0.9500     |
| O3—N4 | 1.260 (2) | C3—H3C              | 0.9800     |
| O4—N4 | 1.234 (2) | C3—H3D              | 0.9800     |
| N1—N2 | 1.293 (2) | C3—H3E              | 0.9800     |
| N2—C1 | 1.342 (2) | C3—H3C <sup>i</sup> | 0.980 (11) |

|             |             |                                       |             |
|-------------|-------------|---------------------------------------|-------------|
| N2—C3       | 1.473 (2)   | C3—H3D <sup>i</sup>                   | 0.980 (16)  |
| N3—C2       | 1.310 (2)   | C3—H3E <sup>i</sup>                   | 0.98 (3)    |
| N3—H3A      | 0.90 (3)    |                                       |             |
| C2—O1—N1    | 109.79 (14) | N3—C2—C1                              | 134.65 (18) |
| N2—N1—O1    | 103.82 (14) | O1—C2—C1                              | 106.58 (15) |
| N1—N2—C1    | 115.09 (16) | N2—C3—H3C                             | 109.5       |
| N1—N2—C3    | 118.75 (16) | N2—C3—H3D                             | 109.5       |
| C1—N2—C3    | 126.16 (17) | H3C—C3—H3D                            | 109.5       |
| C2—N3—H3A   | 120.0 (16)  | N2—C3—H3E                             | 109.5       |
| C2—N3—H3B   | 117.0 (16)  | H3C—C3—H3E                            | 109.5       |
| H3A—N3—H3B  | 123 (2)     | H3D—C3—H3E                            | 109.5       |
| O4—N4—O2    | 121.45 (16) | N2—C3—H3C <sup>i</sup>                | 109.5 (2)   |
| O4—N4—O3    | 120.39 (16) | N2—C3—H3D <sup>i</sup>                | 109.5 (3)   |
| O2—N4—O3    | 118.16 (15) | H3C <sup>i</sup> —C3—H3D <sup>i</sup> | 109.5       |
| N2—C1—C2    | 104.71 (16) | N2—C3—H3E <sup>i</sup>                | 109.5 (5)   |
| N2—C1—H1    | 127.6       | H3C <sup>i</sup> —C3—H3E <sup>i</sup> | 109.5       |
| C2—C1—H1    | 127.6       | H3D <sup>i</sup> —C3—H3E <sup>i</sup> | 109.5       |
| N3—C2—O1    | 118.77 (17) |                                       |             |
| C2—O1—N1—N2 | 0.000 (1)   | N1—O1—C2—N3                           | 180.000 (1) |
| O1—N1—N2—C1 | 0.000 (1)   | N1—O1—C2—C1                           | 0.000 (1)   |
| O1—N1—N2—C3 | 180.000 (1) | N2—C1—C2—N3                           | 180.000 (1) |
| N1—N2—C1—C2 | 0.000 (1)   | N2—C1—C2—O1                           | 0.000 (1)   |
| C3—N2—C1—C2 | 180.000 (1) |                                       |             |

Symmetry code: (i)  $x, -y+1/2, z$ .

#### Hydrogen-bond geometry ( $\text{\AA}, ^\circ$ )

| $D-H\cdots A$                     | $D-H$    | $H\cdots A$ | $D\cdots A$ | $D-H\cdots A$ |
|-----------------------------------|----------|-------------|-------------|---------------|
| N3—H3A $\cdots$ O3                | 0.90 (3) | 1.90 (3)    | 2.806 (2)   | 180 (2)       |
| N3—H3B $\cdots$ O2 <sup>ii</sup>  | 0.87 (3) | 2.06 (3)    | 2.905 (2)   | 162 (2)       |
| N3—H3B $\cdots$ O3 <sup>ii</sup>  | 0.87 (3) | 2.39 (3)    | 3.114 (2)   | 141 (2)       |
| C1—H1 $\cdots$ O3 <sup>ii</sup>   | 0.95     | 2.36        | 3.039 (2)   | 128           |
| C3—H3C $\cdots$ O2 <sup>iii</sup> | 0.98     | 2.37        | 3.260 (3)   | 150           |

Symmetry codes: (ii)  $x-1, y, z$ ; (iii)  $x-1, y, z-1$ .



### Compound 3: MSI perchlorate

**Compound 3**  
CCDC-2024996

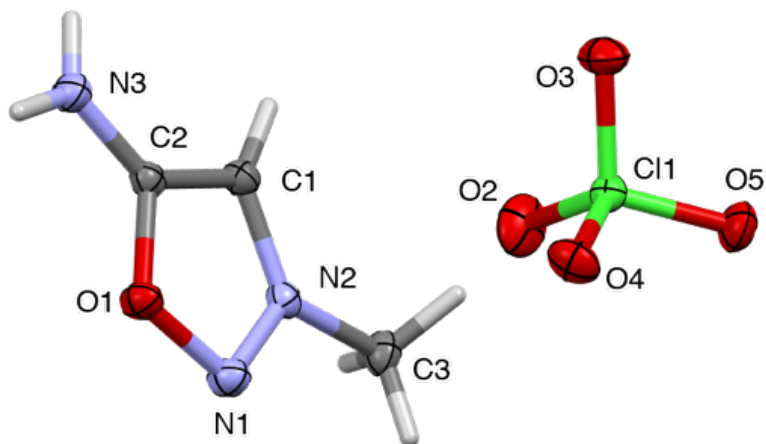

**Fig. 2** Molecular unit 5-amino-3-methyl-1,2,3-oxadiazolium perchlorate (**3**). Ellipsoids are drawn at the 50% probability level.

## Title

Matthias Zeller,\* Matthew Gettings and Davin Piercey

Department of Chemistry, Purdue University, 560 Oval Dr., W. Lafayette, IN 47907-2084, USA

Correspondence email: zeller4@purdue.edu

## Abstract

## Table 1

## Experimental details

|                                                                                                                         |                                                                                                                                     |
|-------------------------------------------------------------------------------------------------------------------------|-------------------------------------------------------------------------------------------------------------------------------------|
| Crystal data                                                                                                            |                                                                                                                                     |
| Chemical formula                                                                                                        | C <sub>3</sub> H <sub>6</sub> N <sub>3</sub> O·ClO <sub>4</sub>                                                                     |
| <i>M</i> <sub>r</sub>                                                                                                   | 199.56                                                                                                                              |
| Crystal system, space group                                                                                             | Monoclinic, <i>C2/c</i>                                                                                                             |
| Temperature (K)                                                                                                         | 150                                                                                                                                 |
| <i>a</i> , <i>b</i> , <i>c</i> (Å)                                                                                      | 19.5213 (6), 5.1844 (1), 14.8287 (5)                                                                                                |
| $\beta$ (°)                                                                                                             | 104.6857 (11)                                                                                                                       |
| <i>V</i> (Å <sup>3</sup> )                                                                                              | 1451.73 (7)                                                                                                                         |
| <i>Z</i>                                                                                                                | 8                                                                                                                                   |
| Radiation type                                                                                                          | Mo <i>K</i> $\alpha$                                                                                                                |
| $\mu$ (mm <sup>-1</sup> )                                                                                               | 0.52                                                                                                                                |
| Crystal size (mm)                                                                                                       | 0.55 × 0.17 × 0.13                                                                                                                  |
| Data collection                                                                                                         |                                                                                                                                     |
| Diffractometer                                                                                                          | Bruker AXS D8 Quest diffractometer with PhotonII charge-integrating pixel array detector (CPAD)                                     |
| Absorption correction                                                                                                   | Multi-scan<br><i>SADABS</i> 2016/2: Krause, L., Herbst-Irmer, R., Sheldrick G.M. & Stalke D., <i>J. Appl. Cryst.</i> 48 (2015) 3-10 |
| <i>T</i> <sub>min</sub> , <i>T</i> <sub>max</sub>                                                                       | 0.677, 0.747                                                                                                                        |
| No. of measured, independent and observed [ <i>I</i> > 2 $\sigma$ ( <i>I</i> )] reflections                             | 18329, 2673, 2415                                                                                                                   |
| <i>R</i> <sub>int</sub>                                                                                                 | 0.031                                                                                                                               |
| ( <i>sin</i> $\theta$ / $\lambda$ ) <sub>max</sub> (Å <sup>-1</sup> )                                                   | 0.770                                                                                                                               |
| Refinement                                                                                                              |                                                                                                                                     |
| <i>R</i> [ <i>F</i> <sup>2</sup> > 2 $\sigma$ ( <i>F</i> <sup>2</sup> )], <i>wR</i> ( <i>F</i> <sup>2</sup> ), <i>S</i> | 0.025, 0.071, 1.05                                                                                                                  |
| No. of reflections                                                                                                      | 2673                                                                                                                                |
| No. of parameters                                                                                                       | 117                                                                                                                                 |
| H-atom treatment                                                                                                        | H atoms treated by a mixture of independent and constrained refinement                                                              |
| $\Delta\rho$ <sub>max</sub> , $\Delta\rho$ <sub>min</sub> (e Å <sup>-3</sup> )                                          | 0.49, -0.49                                                                                                                         |

Computer programs: Apex3 v2019.1-0 (Bruker, 2019), *S*AINT V8.40A (Bruker, 2019), *S*HELXS97 (Sheldrick, 2008), *S*HELXL2018/3 (Sheldrick, 2015, 2018), *S*HELXLE Rev1117 (Hübschle *et al.*, 2011).

**Table 2**

Hydrogen-bond geometry (Å, °)

| <i>D</i> —H... <i>A</i>             | <i>D</i> —H | H... <i>A</i> | <i>D</i> ... <i>A</i> | <i>D</i> —H... <i>A</i> |
|-------------------------------------|-------------|---------------|-----------------------|-------------------------|
| C3—H3 <i>A</i> ...O2                | 0.98        | 2.61          | 3.0971 (13)           | 111                     |
| C3—H3 <i>A</i> ...O2 <sup>i</sup>   | 0.98        | 2.55          | 3.4776 (14)           | 158                     |
| C3—H3 <i>A</i> ...O5 <sup>i</sup>   | 0.98        | 2.66          | 3.2613 (14)           | 120                     |
| C3—H3 <i>B</i> ...O5 <sup>ii</sup>  | 0.98        | 2.44          | 3.2182 (12)           | 136                     |
| N3—H3 <i>D</i> ...O3 <sup>iii</sup> | 0.809 (16)  | 2.160 (16)    | 2.9470 (12)           | 164.2 (14)              |
| N3—H3 <i>E</i> ...O4 <sup>iv</sup>  | 0.825 (16)  | 2.149 (16)    | 2.9610 (12)           | 168.3 (14)              |

Symmetry codes: (i)  $-x+1, y, -z+1/2$ ; (ii)  $x, -y+1, z+1/2$ ; (iii)  $-x+1/2, y+1/2, -z+1/2$ ; (iv)  $x, -y, z+1/2$ .**Acknowledgements**

This material is based upon work supported by the National Science Foundation through the Major Research Instrumentation Program under Grant No. CHE 1625543. (Funding for the single-crystal X-ray diffractometer).

**Funding information****References**

- Allen, F. H., Johnson, O., Shields, G. P., Smith, B. R. & Towler, M. (2004). *J. Appl. Cryst.*, **37**, 335–338.
- Bruker (2018). Apex3 v2018.7-2, *SAINT* V8.38A, Bruker AXS Inc.: Madison (WI), USA, 2018.
- CSD: Groom, C. R. & Allen, F. H. (2014). *Angew. Chem. Int. Ed.*, **53**, 662–671.
- Hübschle, C. B., Sheldrick, G. M. & Dittrich, B. (2011). *J. Appl. Cryst.*, **44**, 1281–1284.
- publCIF*: Westrip, S. P. (2010). *J. Appl. Cryst.*, **43**, 920–925.
- Sheldrick, G. M. (2008). *Acta Cryst.*, **A64**, 112–122.
- Sheldrick, G. M. (2012). *TWINABS*. Ver. 2012/1.
- Sheldrick, G. M. (2015). "Crystal structure refinement with *SHELXL*", *Acta Cryst.*, **C71**, 3–8.
- Sheldrick, G. M. (2018). *SHELXL2018*. University of Göttingen, Germany.
- Spek, A. L. (2003). *J. Appl. Cryst.*, **36**, 7–13.

**Figure 1**

## supporting information

## Title

## Computing details

Data collection: Apex3 v2019.1-0 (Bruker, 2019); cell refinement: *SAINTE* V8.40A (Bruker, 2019); data reduction: *SAINTE* V8.40A (Bruker, 2019); program(s) used to solve structure: *SHELXS97* (Sheldrick, 2008); program(s) used to refine structure: *SHELXL2018/3* (Sheldrick, 2015, 2018), *SHELXLE* Rev1117 (Hübschle *et al.*, 2011).

## (G117E\_MSI\_CLO4\_0m)

## Crystal data

$C_3H_6N_3O \cdot ClO_4$

$M_r = 199.56$

Monoclinic, *C2/c*

$a = 19.5213$  (6) Å

$b = 5.1844$  (1) Å

$c = 14.8287$  (5) Å

$\beta = 104.6857$  (11)°

$V = 1451.73$  (7) Å<sup>3</sup>

$Z = 8$

$F(000) = 816$

$D_x = 1.826$  Mg m<sup>-3</sup>

Mo  $K\alpha$  radiation,  $\lambda = 0.71073$  Å

Cell parameters from 9995 reflections

$\theta = 2.8$ – $33.2^\circ$

$\mu = 0.52$  mm<sup>-1</sup>

$T = 150$  K

Needle, colourless

$0.55 \times 0.17 \times 0.13$  mm

## Data collection

Bruker AXS D8 Quest

diffractometer with PhotonII charge-integrating pixel array detector (CPAD)

Radiation source: fine focus sealed tube X-ray source

Triumph curved graphite crystal monochromator

Detector resolution:  $7.4074$  pixels mm<sup>-1</sup>

$\omega$  and  $\phi$  scans

Absorption correction: multi-scan

*SADABS* 2016/2: Krause, L., Herbst-Irmer, R., Sheldrick G.M. & Stalke D., *J. Appl. Cryst.* 48 (2015) 3-10

$T_{\min} = 0.677$ ,  $T_{\max} = 0.747$

18329 measured reflections

2673 independent reflections

2415 reflections with  $I > 2\sigma(I)$

$R_{\text{int}} = 0.031$

$\theta_{\max} = 33.2^\circ$ ,  $\theta_{\min} = 2.8^\circ$

$h = -30 \rightarrow 30$

$k = -7 \rightarrow 6$

$l = -22 \rightarrow 22$

## Refinement

Refinement on  $F^2$

Least-squares matrix: full

$R[F^2 > 2\sigma(F^2)] = 0.025$

$wR(F^2) = 0.071$

$S = 1.05$

2673 reflections

117 parameters

0 restraints

Primary atom site location: structure-invariant direct methods

Secondary atom site location: difference Fourier map

Hydrogen site location: mixed

H atoms treated by a mixture of independent and constrained refinement

$w = 1/[\sigma^2(F_o^2) + (0.0336P)^2 + 1.1237P]$

where  $P = (F_o^2 + 2F_c^2)/3$

$(\Delta/\sigma)_{\max} = 0.001$

$\Delta\rho_{\max} = 0.49$  e Å<sup>-3</sup>

$\Delta\rho_{\min} = -0.49$  e Å<sup>-3</sup>

Extinction correction: *SHELXL2018/3* (Sheldrick 2018),  $F_c^* = kFc[1 + 0.001x Fc^2\lambda^3/\sin(2\theta)]^{-1/4}$

Extinction coefficient: 0.0056 (8)

*Special details*

*Geometry.* All e.s.d.'s (except the e.s.d. in the dihedral angle between two l.s. planes) are estimated using the full covariance matrix. The cell e.s.d.'s are taken into account individually in the estimation of e.s.d.'s in distances, angles and torsion angles; correlations between e.s.d.'s in cell parameters are only used when they are defined by crystal symmetry. An approximate (isotropic) treatment of cell e.s.d.'s is used for estimating e.s.d.'s involving l.s. planes.

*Refinement.* Positions of N—H hydrogen atoms were freely refined.

*Fractional atomic coordinates and isotropic or equivalent isotropic displacement parameters ( $\text{\AA}^2$ )*

|     | x           | y             | z           | $U_{\text{iso}}^*/U_{\text{eq}}$ |
|-----|-------------|---------------|-------------|----------------------------------|
| C1  | 0.37449 (5) | 0.33309 (18)  | 0.38989 (6) | 0.01651 (16)                     |
| H1  | 0.408239    | 0.207815      | 0.419566    | 0.020*                           |
| C2  | 0.30172 (5) | 0.32790 (18)  | 0.37751 (6) | 0.01517 (16)                     |
| C3  | 0.45480 (5) | 0.6624 (2)    | 0.34430 (7) | 0.01991 (18)                     |
| H3A | 0.482925    | 0.526370      | 0.325017    | 0.030*                           |
| H3B | 0.480282    | 0.729143      | 0.405435    | 0.030*                           |
| H3C | 0.446867    | 0.802625      | 0.298490    | 0.030*                           |
| N1  | 0.33018 (4) | 0.69184 (17)  | 0.31466 (6) | 0.01973 (16)                     |
| N2  | 0.38632 (4) | 0.55619 (16)  | 0.35022 (5) | 0.01531 (14)                     |
| N3  | 0.25701 (5) | 0.16369 (17)  | 0.39905 (6) | 0.01923 (16)                     |
| H3D | 0.2152 (8)  | 0.196 (3)     | 0.3890 (10) | 0.023*                           |
| H3E | 0.2735 (8)  | 0.037 (3)     | 0.4310 (10) | 0.023*                           |
| O1  | 0.27542 (4) | 0.54576 (14)  | 0.33165 (5) | 0.01915 (14)                     |
| O2  | 0.40655 (5) | 0.27309 (19)  | 0.18218 (6) | 0.0329 (2)                       |
| O3  | 0.38568 (4) | -0.13420 (15) | 0.11009 (6) | 0.02573 (17)                     |
| O4  | 0.32859 (4) | 0.23462 (16)  | 0.03326 (5) | 0.02487 (16)                     |
| O5  | 0.45103 (4) | 0.17659 (17)  | 0.05259 (6) | 0.02617 (17)                     |
| Cl1 | 0.39316 (2) | 0.13921 (4)   | 0.09537 (2) | 0.01512 (7)                      |

*Atomic displacement parameters ( $\text{\AA}^2$ )*

|     | $U^{11}$     | $U^{22}$     | $U^{33}$     | $U^{12}$     | $U^{13}$    | $U^{23}$     |
|-----|--------------|--------------|--------------|--------------|-------------|--------------|
| C1  | 0.0164 (4)   | 0.0160 (4)   | 0.0174 (4)   | 0.0024 (3)   | 0.0046 (3)  | 0.0010 (3)   |
| C2  | 0.0165 (4)   | 0.0155 (4)   | 0.0135 (3)   | 0.0017 (3)   | 0.0037 (3)  | -0.0007 (3)  |
| C3  | 0.0175 (4)   | 0.0226 (5)   | 0.0212 (4)   | -0.0032 (3)  | 0.0077 (3)  | -0.0019 (3)  |
| N1  | 0.0177 (3)   | 0.0187 (4)   | 0.0224 (4)   | 0.0010 (3)   | 0.0044 (3)  | 0.0039 (3)   |
| N2  | 0.0161 (3)   | 0.0158 (3)   | 0.0143 (3)   | 0.0008 (2)   | 0.0043 (2)  | -0.0016 (2)  |
| N3  | 0.0173 (3)   | 0.0190 (4)   | 0.0223 (4)   | 0.0007 (3)   | 0.0067 (3)  | 0.0032 (3)   |
| O1  | 0.0157 (3)   | 0.0185 (3)   | 0.0225 (3)   | 0.0018 (2)   | 0.0034 (2)  | 0.0045 (2)   |
| O2  | 0.0398 (5)   | 0.0398 (5)   | 0.0190 (3)   | -0.0105 (4)  | 0.0075 (3)  | -0.0126 (3)  |
| O3  | 0.0214 (3)   | 0.0171 (4)   | 0.0387 (4)   | -0.0002 (3)  | 0.0077 (3)  | 0.0052 (3)   |
| O4  | 0.0188 (3)   | 0.0232 (4)   | 0.0289 (4)   | 0.0051 (3)   | -0.0010 (3) | 0.0001 (3)   |
| O5  | 0.0210 (3)   | 0.0318 (4)   | 0.0298 (4)   | -0.0009 (3)  | 0.0138 (3)  | 0.0040 (3)   |
| Cl1 | 0.01392 (10) | 0.01654 (11) | 0.01473 (10) | -0.00140 (6) | 0.00335 (7) | -0.00132 (6) |

*Geometric parameters ( $\text{\AA}$ ,  $^\circ$ )*

|       |             |        |             |
|-------|-------------|--------|-------------|
| C1—N2 | 1.3439 (12) | N1—N2  | 1.2964 (11) |
| C1—C2 | 1.3858 (12) | N1—O1  | 1.3843 (11) |
| C1—H1 | 0.9500      | N3—H3D | 0.809 (16)  |
| C2—N3 | 1.3151 (12) | N3—H3E | 0.825 (16)  |
| C2—O1 | 1.3508 (11) | O2—Cl1 | 1.4271 (8)  |

|             |             |             |             |
|-------------|-------------|-------------|-------------|
| C3—N2       | 1.4688 (12) | O3—C11      | 1.4472 (8)  |
| C3—H3A      | 0.9800      | O4—C11      | 1.4468 (7)  |
| C3—H3B      | 0.9800      | O5—C11      | 1.4422 (7)  |
| C3—H3C      | 0.9800      |             |             |
| N2—C1—C2    | 104.06 (8)  | N1—N2—C1    | 115.06 (8)  |
| N2—C1—H1    | 128.0       | N1—N2—C3    | 117.43 (8)  |
| C2—C1—H1    | 128.0       | C1—N2—C3    | 127.50 (8)  |
| N3—C2—O1    | 118.20 (8)  | C2—N3—H3D   | 121.4 (11)  |
| N3—C2—C1    | 134.55 (9)  | C2—N3—H3E   | 117.9 (10)  |
| O1—C2—C1    | 107.24 (8)  | H3D—N3—H3E  | 119.8 (14)  |
| N2—C3—H3A   | 109.5       | C2—O1—N1    | 109.67 (7)  |
| N2—C3—H3B   | 109.5       | O2—C11—O5   | 110.29 (5)  |
| H3A—C3—H3B  | 109.5       | O2—C11—O4   | 109.80 (5)  |
| N2—C3—H3C   | 109.5       | O5—C11—O4   | 109.10 (5)  |
| H3A—C3—H3C  | 109.5       | O2—C11—O3   | 110.04 (6)  |
| H3B—C3—H3C  | 109.5       | O5—C11—O3   | 108.55 (5)  |
| N2—N1—O1    | 103.97 (7)  | O4—C11—O3   | 109.02 (5)  |
| N2—C1—C2—N3 | 179.16 (10) | C2—C1—N2—C3 | 179.08 (8)  |
| N2—C1—C2—O1 | 0.11 (9)    | N3—C2—O1—N1 | -179.51 (8) |
| O1—N1—N2—C1 | -0.28 (10)  | C1—C2—O1—N1 | -0.28 (10)  |
| O1—N1—N2—C3 | -179.35 (7) | N2—N1—O1—C2 | 0.33 (10)   |
| C2—C1—N2—N1 | 0.11 (10)   |             |             |

*Hydrogen-bond geometry (Å, °)*

| <i>D</i> —H $\cdots$ <i>A</i>     | <i>D</i> —H | H $\cdots$ <i>A</i> | <i>D</i> $\cdots$ <i>A</i> | <i>D</i> —H $\cdots$ <i>A</i> |
|-----------------------------------|-------------|---------------------|----------------------------|-------------------------------|
| C3—H3A $\cdots$ O2                | 0.98        | 2.61                | 3.0971 (13)                | 111                           |
| C3—H3A $\cdots$ O2 <sup>i</sup>   | 0.98        | 2.55                | 3.4776 (14)                | 158                           |
| C3—H3A $\cdots$ O5 <sup>i</sup>   | 0.98        | 2.66                | 3.2613 (14)                | 120                           |
| C3—H3B $\cdots$ O5 <sup>ii</sup>  | 0.98        | 2.44                | 3.2182 (12)                | 136                           |
| N3—H3D $\cdots$ O3 <sup>iii</sup> | 0.809 (16)  | 2.160 (16)          | 2.9470 (12)                | 164.2 (14)                    |
| N3—H3E $\cdots$ O4 <sup>iv</sup>  | 0.825 (16)  | 2.149 (16)          | 2.9610 (12)                | 168.3 (14)                    |

Symmetry codes: (i)  $-x+1, y, -z+1/2$ ; (ii)  $x, -y+1, z+1/2$ ; (iii)  $-x+1/2, y+1/2, -z+1/2$ ; (iv)  $x, -y, z+1/2$ .

### Compound 4: MSI nitrotetrazole

**Compound 4**  
CCDC-2024995

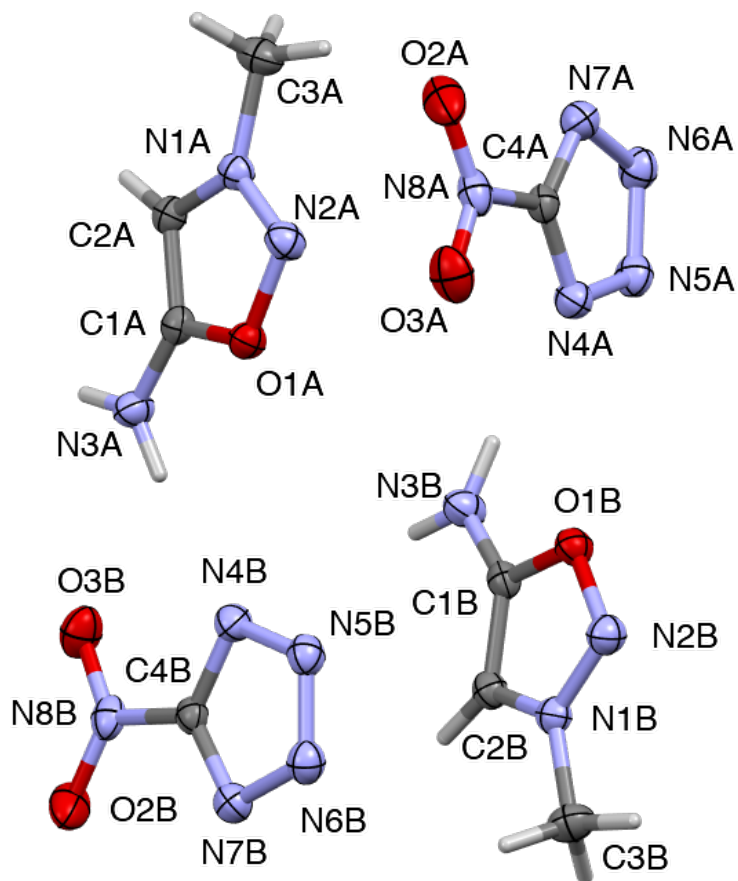

**Fig. 3** Molecular units of 5-amino-3-methyl-1,2,3-oxadiazolium nitrotetrazolate (**4**). Ellipsoids are drawn at the 50% probability level.

## Title

Matthias Zeller,<sup>a\*</sup> Matthew Gettings<sup>b</sup> and Davin Piercey<sup>b</sup><sup>a</sup>Department of Chemistry, Purdue University, 560 Oval Dr., W. Lafayette, IN 47907-2084, USA, and <sup>b</sup>School of Materials Engineering, Neil Armstrong Hall of Engineering, 701 West Stadium Avenue, West Lafayette, IN 47907-2045, USA

Correspondence email: zeller4@purdue.edu

## Abstract

## Table 1

## Experimental details

|                                                                            |                                                                                                                                     |
|----------------------------------------------------------------------------|-------------------------------------------------------------------------------------------------------------------------------------|
| Crystal data                                                               |                                                                                                                                     |
| Chemical formula                                                           | CN <sub>5</sub> O <sub>2</sub> ·C <sub>3</sub> H <sub>6</sub> N <sub>3</sub> O                                                      |
| $M_r$                                                                      | 214.17                                                                                                                              |
| Crystal system, space group                                                | Monoclinic, $P2_1/c$                                                                                                                |
| Temperature (K)                                                            | 150                                                                                                                                 |
| $a, b, c$ (Å)                                                              | 24.1038 (10), 5.0060 (2), 15.4562 (7)                                                                                               |
| $\beta$ (°)                                                                | 108.365 (3)                                                                                                                         |
| $V$ (Å <sup>3</sup> )                                                      | 1770.01 (13)                                                                                                                        |
| $Z$                                                                        | 8                                                                                                                                   |
| Radiation type                                                             | Cu $K\alpha$                                                                                                                        |
| $\mu$ (mm <sup>-1</sup> )                                                  | 1.20                                                                                                                                |
| Crystal size (mm)                                                          | 0.14 × 0.11 × 0.07                                                                                                                  |
| Data collection                                                            |                                                                                                                                     |
| Diffractometer                                                             | Bruker AXS D8 Quest diffractometer with PhotonIII_C14 charge-integrating pixel array detector (CPAD)                                |
| Absorption correction                                                      | Multi-scan<br><i>SADABS</i> 2016/2: Krause, L., Herbst-Irmer, R., Sheldrick G.M. & Stalke D., <i>J. Appl. Cryst.</i> 48 (2015) 3-10 |
| $T_{\min}, T_{\max}$                                                       | 0.698, 0.753                                                                                                                        |
| No. of measured, independent and observed [ $I > 2\sigma(I)$ ] reflections | 24473, 3112, 2737                                                                                                                   |
| $R_{\text{int}}$                                                           | 0.038                                                                                                                               |
| $(\sin \theta/\lambda)_{\text{max}}$ (Å <sup>-1</sup> )                    | 0.596                                                                                                                               |
| Refinement                                                                 |                                                                                                                                     |
| $R[F^2 > 2\sigma(F^2)], wR(F^2), S$                                        | 0.029, 0.077, 1.03                                                                                                                  |
| No. of reflections                                                         | 3112                                                                                                                                |
| No. of parameters                                                          | 290                                                                                                                                 |
| No. of restraints                                                          | 6                                                                                                                                   |
| H-atom treatment                                                           | H atoms treated by a mixture of independent and constrained refinement                                                              |
| $\Delta\rho_{\text{max}}, \Delta\rho_{\text{min}}$ (e Å <sup>-3</sup> )    | 0.20, -0.17                                                                                                                         |

Computer programs: Apex3 v2019.1-0 (Bruker, 2019), *SAINTE* V8.40A (Bruker, 2019), *SHELXS97* (Sheldrick, 2008), *SHELXL2018/3* (Sheldrick, 2015, 2018), *SHELXLE* Rev1117 (Hübschle *et al.*, 2011).



Table 2

Hydrogen-bond geometry (Å, °)

| <i>D</i> —H... <i>A</i>                                | <i>D</i> —H | H... <i>A</i> | <i>D</i> ... <i>A</i> | <i>D</i> —H... <i>A</i> |
|--------------------------------------------------------|-------------|---------------|-----------------------|-------------------------|
| N3 <i>A</i> —H3 <i>D</i> ...N4 <i>B</i>                | 0.87 (1)    | 2.06 (1)      | 2.9186 (16)           | 173 (2)                 |
| N3 <i>A</i> —H3 <i>E</i> ...N5 <i>A</i> <sup>i</sup>   | 0.86 (1)    | 2.14 (1)      | 2.9498 (16)           | 157 (2)                 |
| C2 <i>A</i> —H2 <i>A</i> ...N6 <i>A</i> <sup>i</sup>   | 0.95        | 2.48          | 3.3273 (17)           | 148                     |
| C3 <i>A</i> —H3 <i>A</i> ...N6 <i>A</i> <sup>ii</sup>  | 0.98        | 2.70          | 3.3491 (17)           | 124                     |
| C3 <i>A</i> —H3 <i>B</i> ...N7 <i>A</i> <sup>iii</sup> | 0.98        | 2.63          | 3.5140 (19)           | 149                     |
| C3 <i>A</i> —H3 <i>C</i> ...O2 <i>A</i>                | 0.98        | 2.61          | 3.5121 (19)           | 154                     |
| N3 <i>B</i> —H3 <i>J</i> ...N5 <i>B</i>                | 0.86 (1)    | 2.18 (1)      | 2.9759 (16)           | 154 (2)                 |
| N3 <i>B</i> —H3 <i>J</i> ...N4 <i>A</i>                | 0.87 (1)    | 2.06 (1)      | 2.9207 (16)           | 172 (2)                 |
| C2 <i>B</i> —H2 <i>B</i> ...N5 <i>B</i>                | 0.95        | 2.69          | 3.2722 (16)           | 120                     |
| C2 <i>B</i> —H2 <i>B</i> ...N6 <i>B</i>                | 0.95        | 2.45          | 3.3079 (17)           | 150                     |
| C3 <i>B</i> —H3 <i>H</i> ...N7 <i>B</i> <sup>iv</sup>  | 0.98        | 2.63          | 3.4890 (19)           | 146                     |

Symmetry codes: (i)  $x, -y+5/2, z-1/2$ ; (ii)  $x, -y+3/2, z-1/2$ ; (iii)  $-x, -y+2, -z+1$ ; (iv)  $-x+1, y-1/2, -z+3/2$ .

### Acknowledgements

This material is based upon work supported by the National Science Foundation through the Major Research Instrumentation Program under Grant No. CHE 1625543. (Funding for the single-crystal X-ray diffractometer).

### Funding information

### References

- Allen, F. H., Johnson, O., Shields, G. P., Smith, B. R. & Towler, M. (2004). *J. Appl. Cryst.*, **37**, 335–338.
- Bruker (2019). Apex3 v2019.1-0, *SAINT* V8.40A, Bruker Nano Inc.: Madison (WI), USA, 2019.
- CSD: Groom, C. R. & Allen, F. H. (2014). *Angew. Chem. Int. Ed.*, **53**, 662–671.
- Hübschle, C. B., Sheldrick, G. M. & Dittrich, B. (2011). *J. Appl. Cryst.*, **44**, 1281–1284.
- publCIF*: Westrip, S. P. (2010). *J. Appl. Cryst.*, **43**, 920–925.
- Sheldrick, G. M. (2008). *Acta Cryst.*, **A64**, 112–122.
- Sheldrick, G. M. (2012). *TWINABS*. Ver. 2012/1.
- Sheldrick, G. M. (2015). "Crystal structure refinement with *SHELXL*", *Acta Cryst.*, **C71**, 3–8.
- Sheldrick, G. M. (2015). "*SHELXT*—Integrated space-group and crystal-structure determination", *Acta Cryst.* **A71**, 3–8.
- Sheldrick, G. M. (2018). *SHELXL2018*. University of Göttingen, Germany.
- Spek, A. L. (2003). *J. Appl. Cryst.*, **36**, 7–13.

### Figure 1

## supporting information

## Title

## Computing details

Data collection: Apex3 v2019.1-0 (Bruker, 2019); cell refinement: *SAINTE* V8.40A (Bruker, 2019); data reduction: *SAINTE* V8.40A (Bruker, 2019); program(s) used to solve structure: *SHELXS97* (Sheldrick, 2008); program(s) used to refine structure: *SHELXL2018/3* (Sheldrick, 2015, 2018), *SHELXLE* Rev1117 (Hübschle *et al.*, 2011).

## (G117\_MSI\_NT\_0m)

## Crystal data

CN<sub>5</sub>O<sub>2</sub>·C<sub>3</sub>H<sub>6</sub>N<sub>3</sub>O  
 $M_r = 214.17$   
Monoclinic,  $P2_1/c$   
 $a = 24.1038$  (10) Å  
 $b = 5.0060$  (2) Å  
 $c = 15.4562$  (7) Å  
 $\beta = 108.365$  (3)°  
 $V = 1770.01$  (13) Å<sup>3</sup>  
 $Z = 8$

$F(000) = 880$   
 $D_x = 1.607$  Mg m<sup>-3</sup>  
Cu  $K\alpha$  radiation,  $\lambda = 1.54178$  Å  
Cell parameters from 9897 reflections  
 $\theta = 3.9$ – $66.6^\circ$   
 $\mu = 1.20$  mm<sup>-1</sup>  
 $T = 150$  K  
Block, colourless  
 $0.14 \times 0.11 \times 0.07$  mm

## Data collection

Bruker AXS D8 Quest  
diffractometer with PhotonIII\_C14 charge-integrating  
pixel array detector (CPAD)  
Radiation source: I-mu-S microsource X-ray tube  
Laterally graded multilayer (Goebel) mirror  
monochromator  
Detector resolution:  $7.4074$  pixels mm<sup>-1</sup>  
 $\omega$  and  $\phi$  scans

Absorption correction: multi-scan  
*SADABS* 2016/2: Krause, L., Herbst-Irmer, R.,  
Sheldrick G.M. & Stalke D., *J. Appl. Cryst.* 48 (2015)  
3-10  
 $T_{\min} = 0.698$ ,  $T_{\max} = 0.753$   
24473 measured reflections  
3112 independent reflections  
2737 reflections with  $I > 2\sigma(I)$   
 $R_{\text{int}} = 0.038$   
 $\theta_{\max} = 66.7^\circ$ ,  $\theta_{\min} = 3.9^\circ$   
 $h = -28 \rightarrow 26$   
 $k = -5 \rightarrow 5$   
 $l = -14 \rightarrow 18$

## Refinement

Refinement on  $F^2$   
Least-squares matrix: full  
 $R[F^2 > 2\sigma(F^2)] = 0.029$   
 $wR(F^2) = 0.077$   
 $S = 1.03$   
3112 reflections  
290 parameters  
6 restraints  
Primary atom site location: structure-invariant direct  
methods  
Secondary atom site location: difference Fourier map

Hydrogen site location: mixed  
H atoms treated by a mixture of independent and  
constrained refinement  
 $w = 1/[\sigma^2(F_o^2) + (0.0389P)^2 + 0.551P]$   
where  $P = (F_o^2 + 2F_c^2)/3$   
 $(\Delta/\sigma)_{\max} < 0.001$   
 $\Delta\rho_{\max} = 0.20$  e Å<sup>-3</sup>  
 $\Delta\rho_{\min} = -0.17$  e Å<sup>-3</sup>  
Extinction correction: *SHELXL2018/3* (Sheldrick  
2018),  $F_c^* = kF_c[1 + 0.001x F_c^2 \lambda^3 / \sin(2\theta)]^{-1/4}$   
Extinction coefficient: 0.00137 (16)

*Special details*

*Geometry.* All e.s.d.'s (except the e.s.d. in the dihedral angle between two l.s. planes) are estimated using the full covariance matrix. The cell e.s.d.'s are taken into account individually in the estimation of e.s.d.'s in distances, angles and torsion angles; correlations between e.s.d.'s in cell parameters are only used when they are defined by crystal symmetry. An approximate (isotropic) treatment of cell e.s.d.'s is used for estimating e.s.d.'s involving l.s. planes.

*Refinement.* Amine H atom positions were refined and N—H distances were restrained to be similar to each other.

*Fractional atomic coordinates and isotropic or equivalent isotropic displacement parameters ( $\text{\AA}^2$ )*

|     | <i>x</i>    | <i>y</i>     | <i>z</i>     | $U_{\text{iso}}^*/U_{\text{eq}}$ |
|-----|-------------|--------------|--------------|----------------------------------|
| O1A | 0.18972 (4) | 0.90404 (18) | 0.47750 (6)  | 0.0235 (2)                       |
| O2A | 0.07589 (5) | 0.2800 (2)   | 0.55620 (7)  | 0.0406 (3)                       |
| O3A | 0.17044 (5) | 0.2789 (2)   | 0.61305 (7)  | 0.0380 (3)                       |
| N1A | 0.09782 (5) | 0.9056 (2)   | 0.41950 (7)  | 0.0217 (2)                       |
| N2A | 0.13915 (5) | 0.7713 (2)   | 0.47702 (7)  | 0.0254 (3)                       |
| N3A | 0.21741 (5) | 1.2718 (2)   | 0.41215 (8)  | 0.0267 (3)                       |
| H3D | 0.2523 (6)  | 1.267 (4)    | 0.4511 (10)  | 0.036 (4)*                       |
| H3E | 0.2061 (7)  | 1.395 (3)    | 0.3716 (10)  | 0.032 (4)*                       |
| N4A | 0.16678 (5) | 0.6988 (2)   | 0.72092 (7)  | 0.0248 (2)                       |
| N5A | 0.14563 (5) | 0.8862 (2)   | 0.76345 (7)  | 0.0262 (3)                       |
| N6A | 0.08781 (5) | 0.8762 (2)   | 0.73533 (7)  | 0.0274 (3)                       |
| N7A | 0.06953 (5) | 0.6814 (2)   | 0.67330 (7)  | 0.0269 (3)                       |
| N8A | 0.12221 (5) | 0.3637 (2)   | 0.60845 (7)  | 0.0269 (3)                       |
| C1A | 0.17573 (5) | 1.1165 (3)   | 0.42069 (8)  | 0.0204 (3)                       |
| C2A | 0.11573 (5) | 1.1167 (3)   | 0.38192 (8)  | 0.0213 (3)                       |
| H2A | 0.092399    | 1.238730     | 0.338471     | 0.026*                           |
| C3A | 0.03717 (6) | 0.8194 (3)   | 0.40363 (10) | 0.0307 (3)                       |
| H3A | 0.021927    | 0.739205     | 0.342880     | 0.046*                           |
| H3B | 0.013184    | 0.974081     | 0.407621     | 0.046*                           |
| H3C | 0.035949    | 0.687352     | 0.449809     | 0.046*                           |
| C4A | 0.11919 (5) | 0.5820 (3)   | 0.66772 (8)  | 0.0211 (3)                       |
| O1B | 0.31253 (4) | 0.38489 (18) | 0.79026 (6)  | 0.0241 (2)                       |
| O2B | 0.41986 (5) | 1.7242 (2)   | 0.48258 (6)  | 0.0381 (3)                       |
| O3B | 0.32534 (5) | 1.6988 (2)   | 0.44037 (6)  | 0.0344 (2)                       |
| N1B | 0.40444 (5) | 0.4056 (2)   | 0.82399 (7)  | 0.0218 (2)                       |
| N2B | 0.36412 (5) | 0.2615 (2)   | 0.84034 (7)  | 0.0255 (3)                       |
| N3B | 0.28172 (5) | 0.7468 (2)   | 0.69660 (8)  | 0.0278 (3)                       |
| H3I | 0.2915 (7)  | 0.873 (3)    | 0.6667 (10)  | 0.032 (4)*                       |
| H3J | 0.2465 (6)  | 0.722 (4)    | 0.6989 (11)  | 0.039 (5)*                       |
| N4B | 0.33125 (5) | 1.2795 (2)   | 0.55329 (7)  | 0.0249 (3)                       |
| N5B | 0.35342 (5) | 1.0976 (2)   | 0.61825 (7)  | 0.0256 (3)                       |
| N6B | 0.41108 (5) | 1.1218 (2)   | 0.64990 (7)  | 0.0265 (3)                       |
| N7B | 0.42816 (5) | 1.3210 (2)   | 0.60622 (7)  | 0.0263 (3)                       |
| N8B | 0.37401 (5) | 1.6265 (2)   | 0.48632 (7)  | 0.0251 (3)                       |
| C1B | 0.32484 (5) | 0.6008 (3)   | 0.74706 (8)  | 0.0208 (3)                       |
| C2B | 0.38483 (5) | 0.6140 (3)   | 0.76830 (8)  | 0.0214 (3)                       |
| H2B | 0.407162    | 0.741697     | 0.748063     | 0.026*                           |
| C3B | 0.46547 (6) | 0.3283 (3)   | 0.86818 (10) | 0.0318 (3)                       |
| H3F | 0.481553    | 0.252781     | 0.822650     | 0.048*                           |
| H3G | 0.467440    | 0.194556     | 0.915358     | 0.048*                           |
| H3H | 0.488231    | 0.485902     | 0.896088     | 0.048*                           |
| C4B | 0.37816 (5) | 1.4085 (3)   | 0.54896 (8)  | 0.0202 (3)                       |

*Atomic displacement parameters (Å<sup>2</sup>)*

|     | $U^{11}$   | $U^{22}$   | $U^{33}$   | $U^{12}$    | $U^{13}$   | $U^{23}$    |
|-----|------------|------------|------------|-------------|------------|-------------|
| O1A | 0.0220 (5) | 0.0234 (5) | 0.0244 (4) | 0.0014 (4)  | 0.0065 (3) | 0.0039 (4)  |
| O2A | 0.0491 (7) | 0.0433 (7) | 0.0346 (5) | -0.0234 (5) | 0.0205 (5) | -0.0175 (5) |
| O3A | 0.0487 (7) | 0.0325 (6) | 0.0398 (6) | 0.0099 (5)  | 0.0240 (5) | 0.0000 (4)  |
| N1A | 0.0220 (5) | 0.0215 (6) | 0.0224 (5) | 0.0002 (4)  | 0.0083 (4) | -0.0017 (4) |
| N2A | 0.0252 (6) | 0.0243 (6) | 0.0283 (5) | -0.0007 (4) | 0.0104 (5) | 0.0035 (4)  |
| N3A | 0.0215 (6) | 0.0294 (7) | 0.0262 (6) | -0.0020 (5) | 0.0034 (5) | 0.0059 (5)  |
| N4A | 0.0241 (6) | 0.0262 (6) | 0.0248 (5) | -0.0015 (5) | 0.0085 (4) | -0.0014 (5) |
| N5A | 0.0306 (6) | 0.0246 (6) | 0.0238 (5) | -0.0026 (5) | 0.0090 (4) | -0.0025 (4) |
| N6A | 0.0302 (6) | 0.0275 (6) | 0.0248 (5) | 0.0032 (5)  | 0.0090 (5) | -0.0016 (5) |
| N7A | 0.0247 (6) | 0.0304 (6) | 0.0247 (5) | -0.0002 (5) | 0.0066 (4) | -0.0013 (5) |
| N8A | 0.0378 (7) | 0.0222 (6) | 0.0257 (5) | -0.0048 (5) | 0.0170 (5) | -0.0004 (4) |
| C1A | 0.0238 (6) | 0.0198 (6) | 0.0177 (5) | 0.0021 (5)  | 0.0066 (5) | 0.0001 (5)  |
| C2A | 0.0229 (6) | 0.0205 (7) | 0.0200 (6) | 0.0007 (5)  | 0.0060 (5) | 0.0002 (5)  |
| C3A | 0.0228 (7) | 0.0323 (8) | 0.0385 (7) | -0.0039 (6) | 0.0119 (6) | -0.0022 (6) |
| C4A | 0.0252 (6) | 0.0214 (6) | 0.0185 (5) | -0.0016 (5) | 0.0093 (5) | 0.0007 (5)  |
| O1B | 0.0231 (5) | 0.0239 (5) | 0.0260 (4) | -0.0016 (4) | 0.0088 (4) | 0.0033 (4)  |
| O2B | 0.0444 (6) | 0.0405 (6) | 0.0283 (5) | -0.0212 (5) | 0.0102 (4) | 0.0025 (4)  |
| O3B | 0.0410 (6) | 0.0321 (6) | 0.0279 (5) | 0.0090 (5)  | 0.0075 (4) | 0.0061 (4)  |
| N1B | 0.0224 (5) | 0.0217 (6) | 0.0213 (5) | -0.0001 (4) | 0.0071 (4) | -0.0014 (4) |
| N2B | 0.0251 (6) | 0.0251 (6) | 0.0254 (5) | 0.0002 (5)  | 0.0066 (4) | 0.0037 (4)  |
| N3B | 0.0225 (6) | 0.0288 (7) | 0.0331 (6) | 0.0016 (5)  | 0.0102 (5) | 0.0083 (5)  |
| N4B | 0.0247 (6) | 0.0263 (6) | 0.0232 (5) | -0.0034 (5) | 0.0068 (4) | 0.0017 (4)  |
| N5B | 0.0288 (6) | 0.0249 (6) | 0.0243 (5) | -0.0022 (5) | 0.0099 (4) | 0.0018 (4)  |
| N6B | 0.0298 (6) | 0.0254 (6) | 0.0245 (5) | 0.0023 (5)  | 0.0090 (5) | 0.0026 (4)  |
| N7B | 0.0249 (6) | 0.0289 (6) | 0.0257 (5) | -0.0007 (5) | 0.0090 (4) | 0.0014 (5)  |
| N8B | 0.0343 (6) | 0.0222 (6) | 0.0185 (5) | -0.0042 (5) | 0.0077 (5) | -0.0032 (4) |
| C1B | 0.0244 (6) | 0.0203 (7) | 0.0200 (6) | -0.0018 (5) | 0.0102 (5) | -0.0008 (5) |
| C2B | 0.0234 (6) | 0.0200 (7) | 0.0219 (6) | -0.0009 (5) | 0.0089 (5) | -0.0003 (5) |
| C3B | 0.0237 (7) | 0.0342 (8) | 0.0338 (7) | 0.0031 (6)  | 0.0040 (6) | 0.0004 (6)  |
| C4B | 0.0235 (6) | 0.0209 (6) | 0.0169 (5) | -0.0018 (5) | 0.0074 (5) | -0.0023 (5) |

*Geometric parameters (Å, °)*

|         |             |         |             |
|---------|-------------|---------|-------------|
| O1A—C1A | 1.3525 (15) | O1B—C1B | 1.3516 (15) |
| O1A—N2A | 1.3863 (14) | O1B—N2B | 1.3856 (14) |
| O2A—N8A | 1.2272 (16) | O2B—N8B | 1.2263 (15) |
| O3A—N8A | 1.2185 (16) | O3B—N8B | 1.2192 (15) |
| N1A—N2A | 1.2949 (16) | N1B—N2B | 1.2973 (16) |
| N1A—C2A | 1.3411 (17) | N1B—C2B | 1.3403 (17) |
| N1A—C3A | 1.4687 (16) | N1B—C3B | 1.4653 (17) |
| N3A—C1A | 1.3095 (18) | N3B—C1B | 1.3082 (18) |
| N3A—H3D | 0.868 (14)  | N3B—H3I | 0.858 (13)  |
| N3A—H3E | 0.861 (13)  | N3B—H3J | 0.869 (14)  |
| N4A—C4A | 1.3189 (17) | N4B—C4B | 1.3217 (17) |
| N4A—N5A | 1.3352 (16) | N4B—N5B | 1.3360 (16) |
| N5A—N6A | 1.3236 (16) | N5B—N6B | 1.3256 (16) |
| N6A—N7A | 1.3408 (17) | N6B—N7B | 1.3396 (16) |
| N7A—C4A | 1.3240 (17) | N7B—C4B | 1.3250 (17) |
| N8A—C4A | 1.4422 (17) | N8B—C4B | 1.4416 (17) |

|                 |              |                 |              |
|-----------------|--------------|-----------------|--------------|
| C1A—C2A         | 1.3800 (18)  | C1B—C2B         | 1.3799 (18)  |
| C2A—H2A         | 0.9500       | C2B—H2B         | 0.9500       |
| C3A—H3A         | 0.9800       | C3B—H3F         | 0.9800       |
| C3A—H3B         | 0.9800       | C3B—H3G         | 0.9800       |
| C3A—H3C         | 0.9800       | C3B—H3H         | 0.9800       |
| C1A—O1A—N2A     | 109.54 (9)   | C1B—O1B—N2B     | 109.54 (9)   |
| N2A—N1A—C2A     | 115.05 (10)  | N2B—N1B—C2B     | 115.06 (11)  |
| N2A—N1A—C3A     | 118.17 (11)  | N2B—N1B—C3B     | 117.79 (11)  |
| C2A—N1A—C3A     | 126.76 (11)  | C2B—N1B—C3B     | 127.14 (11)  |
| N1A—N2A—O1A     | 103.87 (9)   | N1B—N2B—O1B     | 103.83 (9)   |
| C1A—N3A—H3D     | 121.4 (11)   | C1B—N3B—H3I     | 115.5 (11)   |
| C1A—N3A—H3E     | 115.0 (11)   | C1B—N3B—H3J     | 119.8 (12)   |
| H3D—N3A—H3E     | 122.7 (16)   | H3I—N3B—H3J     | 124.4 (16)   |
| C4A—N4A—N5A     | 103.09 (10)  | C4B—N4B—N5B     | 103.01 (10)  |
| N6A—N5A—N4A     | 109.73 (10)  | N6B—N5B—N4B     | 109.84 (10)  |
| N5A—N6A—N7A     | 109.71 (10)  | N5B—N6B—N7B     | 109.59 (10)  |
| C4A—N7A—N6A     | 102.68 (11)  | C4B—N7B—N6B     | 102.90 (10)  |
| O3A—N8A—O2A     | 124.94 (12)  | O3B—N8B—O2B     | 124.76 (12)  |
| O3A—N8A—C4A     | 117.72 (12)  | O3B—N8B—C4B     | 117.79 (11)  |
| O2A—N8A—C4A     | 117.34 (11)  | O2B—N8B—C4B     | 117.45 (11)  |
| N3A—C1A—O1A     | 119.34 (11)  | N3B—C1B—O1B     | 118.97 (11)  |
| N3A—C1A—C2A     | 133.48 (12)  | N3B—C1B—C2B     | 133.73 (12)  |
| O1A—C1A—C2A     | 107.17 (11)  | O1B—C1B—C2B     | 107.29 (11)  |
| N1A—C2A—C1A     | 104.34 (11)  | N1B—C2B—C1B     | 104.28 (11)  |
| N1A—C2A—H2A     | 127.8        | N1B—C2B—H2B     | 127.9        |
| C1A—C2A—H2A     | 127.8        | C1B—C2B—H2B     | 127.9        |
| N1A—C3A—H3A     | 109.5        | N1B—C3B—H3F     | 109.5        |
| N1A—C3A—H3B     | 109.5        | N1B—C3B—H3G     | 109.5        |
| H3A—C3A—H3B     | 109.5        | H3F—C3B—H3G     | 109.5        |
| N1A—C3A—H3C     | 109.5        | N1B—C3B—H3H     | 109.5        |
| H3A—C3A—H3C     | 109.5        | H3F—C3B—H3H     | 109.5        |
| H3B—C3A—H3C     | 109.5        | H3G—C3B—H3H     | 109.5        |
| N4A—C4A—N7A     | 114.79 (11)  | N4B—C4B—N7B     | 114.67 (11)  |
| N4A—C4A—N8A     | 121.59 (11)  | N4B—C4B—N8B     | 121.63 (11)  |
| N7A—C4A—N8A     | 123.61 (12)  | N7B—C4B—N8B     | 123.70 (11)  |
| C2A—N1A—N2A—O1A | -0.51 (13)   | C2B—N1B—N2B—O1B | 0.37 (13)    |
| C3A—N1A—N2A—O1A | -178.95 (10) | C3B—N1B—N2B—O1B | 179.56 (10)  |
| C1A—O1A—N2A—N1A | 1.10 (12)    | C1B—O1B—N2B—N1B | -0.84 (12)   |
| C4A—N4A—N5A—N6A | 0.01 (13)    | C4B—N4B—N5B—N6B | -0.05 (13)   |
| N4A—N5A—N6A—N7A | -0.07 (14)   | N4B—N5B—N6B—N7B | -0.04 (14)   |
| N5A—N6A—N7A—C4A | 0.10 (13)    | N5B—N6B—N7B—C4B | 0.10 (13)    |
| N2A—O1A—C1A—N3A | 179.05 (11)  | N2B—O1B—C1B—N3B | -179.34 (11) |
| N2A—O1A—C1A—C2A | -1.28 (12)   | N2B—O1B—C1B—C2B | 0.99 (13)    |
| N2A—N1A—C2A—C1A | -0.25 (14)   | N2B—N1B—C2B—C1B | 0.21 (14)    |
| C3A—N1A—C2A—C1A | 178.04 (11)  | C3B—N1B—C2B—C1B | -178.88 (12) |
| N3A—C1A—C2A—N1A | -179.47 (13) | N3B—C1B—C2B—N1B | 179.67 (14)  |
| O1A—C1A—C2A—N1A | 0.92 (13)    | O1B—C1B—C2B—N1B | -0.73 (13)   |
| N5A—N4A—C4A—N7A | 0.06 (14)    | N5B—N4B—C4B—N7B | 0.12 (14)    |
| N5A—N4A—C4A—N8A | 179.87 (11)  | N5B—N4B—C4B—N8B | -179.84 (10) |
| N6A—N7A—C4A—N4A | -0.10 (14)   | N6B—N7B—C4B—N4B | -0.14 (14)   |

|                 |              |                 |              |
|-----------------|--------------|-----------------|--------------|
| N6A—N7A—C4A—N8A | -179.91 (11) | N6B—N7B—C4B—N8B | 179.82 (11)  |
| O3A—N8A—C4A—N4A | 4.43 (17)    | O3B—N8B—C4B—N4B | 3.85 (17)    |
| O2A—N8A—C4A—N4A | -174.56 (12) | O2B—N8B—C4B—N4B | -175.48 (11) |
| O3A—N8A—C4A—N7A | -175.77 (12) | O3B—N8B—C4B—N7B | -176.11 (11) |
| O2A—N8A—C4A—N7A | 5.24 (18)    | O2B—N8B—C4B—N7B | 4.56 (18)    |

*Hydrogen-bond geometry (Å, °)*

| <i>D</i> —H··· <i>A</i>      | <i>D</i> —H | H··· <i>A</i> | <i>D</i> ··· <i>A</i> | <i>D</i> —H··· <i>A</i> |
|------------------------------|-------------|---------------|-----------------------|-------------------------|
| N3A—H3D···N4B                | 0.87 (1)    | 2.06 (1)      | 2.9186 (16)           | 173 (2)                 |
| N3A—H3E···N5A <sup>i</sup>   | 0.86 (1)    | 2.14 (1)      | 2.9498 (16)           | 157 (2)                 |
| C2A—H2A···N6A <sup>i</sup>   | 0.95        | 2.48          | 3.3273 (17)           | 148                     |
| C3A—H3A···N6A <sup>ii</sup>  | 0.98        | 2.70          | 3.3491 (17)           | 124                     |
| C3A—H3B···N7A <sup>iii</sup> | 0.98        | 2.63          | 3.5140 (19)           | 149                     |
| C3A—H3C···O2A                | 0.98        | 2.61          | 3.5121 (19)           | 154                     |
| N3B—H3I···N5B                | 0.86 (1)    | 2.18 (1)      | 2.9759 (16)           | 154 (2)                 |
| N3B—H3J···N4A                | 0.87 (1)    | 2.06 (1)      | 2.9207 (16)           | 172 (2)                 |
| C2B—H2B···N5B                | 0.95        | 2.69          | 3.2722 (16)           | 120                     |
| C2B—H2B···N6B                | 0.95        | 2.45          | 3.3079 (17)           | 150                     |
| C3B—H3H···N7B <sup>iv</sup>  | 0.98        | 2.63          | 3.4890 (19)           | 146                     |

Symmetry codes: (i)  $x, -y+5/2, z-1/2$ ; (ii)  $x, -y+3/2, z-1/2$ ; (iii)  $-x, -y+2, -z+1$ ; (iv)  $-x+1, y-1/2, -z+3/2$ .

## Compound 5: MSI DNTT

**Compound 5**  
CCDC-2024997

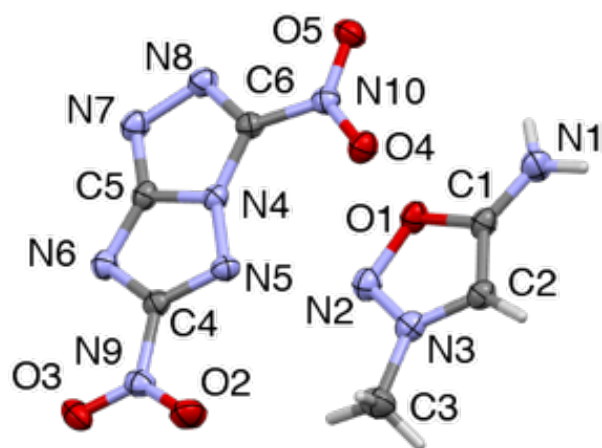

**Fig. 4** Molecular unit of 5-amino-3-methyl-1,2,3-oxadiazolium DNTT (5). Ellipsoids are drawn at the 50% probability level.

## Title

Matthias Zeller,\* Matthew Gettings and Davin Piercey

Department of Chemistry, Purdue University, 560 Oval Dr., W. Lafayette, IN 47907-2084, USA

Correspondence email: zeller4@purdue.edu

## Abstract

## Table 1

## Experimental details

## Crystal data

|                                    |                                                                                              |
|------------------------------------|----------------------------------------------------------------------------------------------|
| Chemical formula                   | C <sub>3</sub> N <sub>7</sub> O <sub>4</sub> ·C <sub>3</sub> H <sub>6</sub> N <sub>3</sub> O |
| <i>M</i> <sub>r</sub>              | 298.21                                                                                       |
| Crystal system, space group        | Triclinic, <i>P</i> $\bar{1}$                                                                |
| Temperature (K)                    | 150                                                                                          |
| <i>a</i> , <i>b</i> , <i>c</i> (Å) | 7.2060 (4), 9.3911 (5), 9.4448 (5)                                                           |
| <i>α</i> , <i>β</i> , <i>γ</i> (°) | 71.6516 (19), 85.772 (2), 71.196 (2)                                                         |
| <i>V</i> (Å <sup>3</sup> )         | 574.01 (5)                                                                                   |
| <i>Z</i>                           | 2                                                                                            |
| Radiation type                     | Mo <i>Kα</i>                                                                                 |
| <i>μ</i> (mm <sup>-1</sup> )       | 0.15                                                                                         |
| Crystal size (mm)                  | 0.24 × 0.20 × 0.13                                                                           |

## Data collection

|                                                                                    |                                                                                                                                     |
|------------------------------------------------------------------------------------|-------------------------------------------------------------------------------------------------------------------------------------|
| Diffractionmeter                                                                   | Bruker AXS D8 Quest diffractometer with PhotonII charge-integrating pixel array detector (CPAD)                                     |
| Absorption correction                                                              | Multi-scan<br><i>SADABS</i> 2016/2: Krause, L., Herbst-Irmer, R., Sheldrick G.M. & Stalke D., <i>J. Appl. Cryst.</i> 48 (2015) 3-10 |
| <i>T</i> <sub>min</sub> , <i>T</i> <sub>max</sub>                                  | 0.676, 0.747                                                                                                                        |
| No. of measured, independent and observed [ <i>I</i> > 2σ( <i>I</i> )] reflections | 19787, 4208, 2910                                                                                                                   |
| <i>R</i> <sub>int</sub>                                                            | 0.053                                                                                                                               |
| (sin <i>θ</i> /λ) <sub>max</sub> (Å <sup>-1</sup> )                                | 0.770                                                                                                                               |

## Refinement

|                                                                                                                |                                                                        |
|----------------------------------------------------------------------------------------------------------------|------------------------------------------------------------------------|
| <i>R</i> [ <i>F</i> <sup>2</sup> > 2σ( <i>F</i> <sup>2</sup> )], <i>wR</i> ( <i>F</i> <sup>2</sup> ), <i>S</i> | 0.043, 0.107, 1.02                                                     |
| No. of reflections                                                                                             | 4208                                                                   |
| No. of parameters                                                                                              | 243                                                                    |
| No. of restraints                                                                                              | 37                                                                     |
| H-atom treatment                                                                                               | H atoms treated by a mixture of independent and constrained refinement |
| Δ <i>ρ</i> <sub>max</sub> , Δ <i>ρ</i> <sub>min</sub> (e Å <sup>-3</sup> )                                     | 0.41, -0.26                                                            |

Computer programs: Apex3 v2019.1-0 (Bruker, 2019), *S*AINT V8.40A (Bruker, 2019), *S*HELXS97 (Sheldrick, 2008), *S*HELXL2018/3 (Sheldrick, 2015, 2018), *S*HELXLE Rev1117 (Hübschle *et al.*, 2011).



Table 2

Hydrogen-bond geometry (Å, °)

| <i>D</i> —H··· <i>A</i>                 | <i>D</i> —H | H··· <i>A</i> | <i>D</i> ··· <i>A</i> | <i>D</i> —H··· <i>A</i> |
|-----------------------------------------|-------------|---------------|-----------------------|-------------------------|
| C2—H2···N6 <sup>i</sup>                 | 0.95        | 2.42          | 3.2951 (17)           | 154                     |
| C2—H2···N7 <sup>B</sup> <sup>i</sup>    | 0.95        | 2.58          | 3.111 (15)            | 116                     |
| C2—H2···N8 <sup>B</sup> <sup>i</sup>    | 0.95        | 1.95          | 2.789 (18)            | 147                     |
| C3—H3A···O4 <sup>ii</sup>               | 0.98        | 2.60          | 3.4557 (18)           | 146                     |
| C3—H3C···O2 <sup>B</sup> <sup>iii</sup> | 0.98        | 2.05          | 2.88 (2)              | 140                     |
| C3—H3C···O3 <sup>B</sup> <sup>iii</sup> | 0.98        | 2.45          | 3.38 (2)              | 159                     |
| C3—H3C···N9 <sup>B</sup> <sup>iii</sup> | 0.98        | 2.59          | 3.544 (16)            | 165                     |
| N1—H1A···O5 <sup>iv</sup>               | 0.854 (19)  | 2.342 (19)    | 3.1010 (17)           | 148.3 (15)              |
| N1—H1A···N8 <sup>iv</sup>               | 0.854 (19)  | 2.330 (18)    | 3.0269 (17)           | 139.1 (15)              |
| N1—H1A···O3 <sup>B</sup> <sup>iv</sup>  | 0.854 (19)  | 2.58 (3)      | 3.29 (2)              | 141.3 (16)              |
| N1—H1A···N6 <sup>B</sup> <sup>iv</sup>  | 0.854 (19)  | 2.56 (3)      | 3.342 (17)            | 152.5 (16)              |
| N1—H1B···N7 <sup>i</sup>                | 0.898 (19)  | 2.02 (2)      | 2.9131 (16)           | 173.9 (17)              |
| N1—H1B···N7 <sup>B</sup> <sup>i</sup>   | 0.898 (19)  | 1.97 (2)      | 2.748 (15)            | 144.0 (17)              |

Symmetry codes: (i)  $x, y-1, z$ ; (ii)  $-x+1, -y+1, -z+1$ ; (iii)  $x+1, y, z$ ; (iv)  $-x, -y+1, -z+2$ .

### Acknowledgements

This material is based upon work supported by the National Science Foundation through the Major Research Instrumentation Program under Grant No. CHE 1625543. (Funding for the single-crystal X-ray diffractometer).

### Funding information

### References

- Allen, F. H., Johnson, O., Shields, G. P., Smith, B. R. & Towler, M. (2004). *J. Appl. Cryst.*, **37**, 335–338.
- Bruker (2018). Apex3 v2018.7-2, *SAINT* V8.38A, Bruker AXS Inc.: Madison (WI), USA, 2018.
- CSD: Groom, C. R. & Allen, F. H. (2014). *Angew. Chem. Int. Ed.*, **53**, 662–671.
- Hübschle, C. B., Sheldrick, G. M. & Dittrich, B. (2011). *J. Appl. Cryst.*, **44**, 1281–1284.
- publCIF*: Westrip, S. P. (2010). *J. Appl. Cryst.*, **43**, 920–925.
- Sheldrick, G. M. (2008). *Acta Cryst.*, **A64**, 112–122.
- Sheldrick, G. M. (2012). *TWINABS*. Ver. 2012/1.
- Sheldrick, G. M. (2015). "Crystal structure refinement with *SHELXL*", *Acta Cryst.*, **C71**, 3–8.
- Sheldrick, G. M. (2018). *SHELXL2018*. University of Göttingen, Germany.
- Spek, A. L. (2003). *J. Appl. Cryst.*, **36**, 7–13.

### Figure 1

## supporting information

## Title

## Computing details

Data collection: Apex3 v2019.1-0 (Bruker, 2019); cell refinement: *SAINTE* V8.40A (Bruker, 2019); data reduction: *SAINTE* V8.40A (Bruker, 2019); program(s) used to solve structure: *SHELXS97* (Sheldrick, 2008); program(s) used to refine structure: *SHELXL2018/3* (Sheldrick, 2015, 2018), *SHELXLE* Rev1117 (Hübschle *et al.*, 2011).

## (G117\_MSI\_DNTT\_0m)

## Crystal data

$C_3N_7O_4 \cdot C_3H_6N_3O$   
 $M_r = 298.21$   
 Triclinic, *P*1  
 $a = 7.2060$  (4) Å  
 $b = 9.3911$  (5) Å  
 $c = 9.4448$  (5) Å  
 $\alpha = 71.6516$  (19)°  
 $\beta = 85.772$  (2)°  
 $\gamma = 71.196$  (2)°  
 $V = 574.01$  (5) Å<sup>3</sup>

$Z = 2$   
 $F(000) = 304$   
 $D_x = 1.725$  Mg m<sup>-3</sup>  
 Mo  $K\alpha$  radiation,  $\lambda = 0.71073$  Å  
 Cell parameters from 6327 reflections  
 $\theta = 2.8$ – $33.2$ °  
 $\mu = 0.15$  mm<sup>-1</sup>  
 $T = 150$  K  
 Block, colourless  
 0.24 × 0.20 × 0.13 mm

## Data collection

Bruker AXS D8 Quest  
 diffractometer with PhotonII charge-integrating pixel  
 array detector (CPAD)  
 Radiation source: fine focus sealed tube X-ray source  
 Triumph curved graphite crystal monochromator  
 Detector resolution: 7.4074 pixels mm<sup>-1</sup>  
 $\omega$  and  $\phi$  scans

Absorption correction: multi-scan  
*SADABS* 2016/2: Krause, L., Herbst-Irmer, R.,  
 Sheldrick G.M. & Stalke D., *J. Appl. Cryst.* 48 (2015)  
 3–10  
 $T_{\min} = 0.676$ ,  $T_{\max} = 0.747$   
 19787 measured reflections  
 4208 independent reflections  
 2910 reflections with  $I > 2\sigma(I)$   
 $R_{\text{int}} = 0.053$   
 $\theta_{\max} = 33.2$ °,  $\theta_{\min} = 2.3$ °  
 $h = -11 \rightarrow 11$   
 $k = -14 \rightarrow 13$   
 $l = -14 \rightarrow 14$

## Refinement

Refinement on  $F^2$   
 Least-squares matrix: full  
 $R[F^2 > 2\sigma(F^2)] = 0.043$   
 $wR(F^2) = 0.107$   
 $S = 1.02$   
 4208 reflections  
 243 parameters  
 37 restraints  
 Primary atom site location: structure-invariant direct  
 methods  
 Secondary atom site location: difference Fourier map

Hydrogen site location: mixed  
 H atoms treated by a mixture of independent and  
 constrained refinement  
 $w = 1/[\sigma^2(F_o^2) + (0.0451P)^2 + 0.1194P]$   
 where  $P = (F_o^2 + 2F_c^2)/3$   
 $(\Delta/\sigma)_{\max} < 0.001$   
 $\Delta\rho_{\max} = 0.41$  e Å<sup>-3</sup>  
 $\Delta\rho_{\min} = -0.26$  e Å<sup>-3</sup>  
 Extinction correction: *SHELXL2018/3* (Sheldrick  
 2018),  $F_c^* = kF_c[1 + 0.001xF_c^2\lambda^3/\sin(2\theta)]^{-1/4}$   
 Extinction coefficient: 0.024 (5)

*Special details*

*Geometry.* All e.s.d.'s (except the e.s.d. in the dihedral angle between two l.s. planes) are estimated using the full covariance matrix. The cell e.s.d.'s are taken into account individually in the estimation of e.s.d.'s in distances, angles and torsion angles; correlations between e.s.d.'s in cell parameters are only used when they are defined by crystal symmetry. An approximate (isotropic) treatment of cell e.s.d.'s is used for estimating e.s.d.'s involving l.s. planes.

*Refinement.* The anion exhibits minor disorder in place over two alternative orientations. The two disordered moieties were restrained to have similar geometries.  $U^{ij}$  components of ADPs for disordered atoms closer to each other than 2.0 Angstrom were restrained to be similar. Equivalent atoms in the major and minor moiety were constrained to have identical ADPs. Subject to these conditions the occupancy ratio refined to 0.9467 (10) to 0.0533 (10). Amine H atoms were freely refined.

*Fractional atomic coordinates and isotropic or equivalent isotropic displacement parameters ( $\text{\AA}^2$ )*

|     | <i>x</i>      | <i>y</i>     | <i>z</i>     | $U_{\text{iso}}^*/U_{\text{eq}}$ | Occ. (<1)   |
|-----|---------------|--------------|--------------|----------------------------------|-------------|
| C1  | 0.39717 (18)  | 0.23491 (14) | 0.90203 (13) | 0.0238 (2)                       |             |
| C2  | 0.53967 (18)  | 0.20947 (14) | 0.79838 (13) | 0.0241 (2)                       |             |
| H2  | 0.563608      | 0.136476     | 0.743511     | 0.029*                           |             |
| C3  | 0.8024 (2)    | 0.33334 (19) | 0.69825 (17) | 0.0373 (3)                       |             |
| H3A | 0.754580      | 0.391215     | 0.594983     | 0.056*                           |             |
| H3B | 0.896565      | 0.229858     | 0.702665     | 0.056*                           |             |
| H3C | 0.866637      | 0.393606     | 0.733924     | 0.056*                           |             |
| N1  | 0.25846 (19)  | 0.17317 (15) | 0.95677 (14) | 0.0315 (3)                       |             |
| H1A | 0.181 (3)     | 0.202 (2)    | 1.022 (2)    | 0.040 (5)*                       |             |
| H1B | 0.239 (3)     | 0.098 (2)    | 0.925 (2)    | 0.043 (5)*                       |             |
| N2  | 0.57393 (17)  | 0.39806 (13) | 0.88094 (12) | 0.0282 (2)                       |             |
| N3  | 0.63640 (16)  | 0.31137 (12) | 0.79297 (11) | 0.0255 (2)                       |             |
| O1  | 0.41906 (14)  | 0.34912 (10) | 0.95179 (10) | 0.0264 (2)                       |             |
| C4  | 0.57851 (19)  | 0.81021 (15) | 0.61133 (14) | 0.0216 (2)                       | 0.9467 (10) |
| C5  | 0.36479 (19)  | 0.87773 (14) | 0.75358 (13) | 0.0221 (2)                       | 0.9467 (10) |
| C6  | 0.16908 (18)  | 0.74095 (16) | 0.77790 (14) | 0.0215 (2)                       | 0.9467 (10) |
| O2  | 0.78883 (16)  | 0.71131 (13) | 0.44546 (13) | 0.0362 (2)                       | 0.9467 (10) |
| O3  | 0.8487 (2)    | 0.8872 (2)   | 0.5241 (2)   | 0.0313 (3)                       | 0.9467 (10) |
| O4  | 0.15991 (15)  | 0.54893 (12) | 0.68523 (11) | 0.0293 (2)                       | 0.9467 (10) |
| O5  | -0.06586 (17) | 0.62040 (16) | 0.83931 (15) | 0.0302 (3)                       | 0.9467 (10) |
| N4  | 0.33355 (16)  | 0.76358 (14) | 0.70752 (13) | 0.0200 (2)                       | 0.9467 (10) |
| N5  | 0.47352 (15)  | 0.71643 (12) | 0.61130 (11) | 0.0218 (2)                       | 0.9467 (10) |
| N6  | 0.52634 (17)  | 0.91041 (14) | 0.69238 (13) | 0.0232 (2)                       | 0.9467 (10) |
| N7  | 0.22537 (17)  | 0.92463 (13) | 0.84734 (12) | 0.0261 (2)                       | 0.9467 (10) |
| N8  | 0.10328 (17)  | 0.83587 (14) | 0.86069 (13) | 0.0254 (2)                       | 0.9467 (10) |
| N9  | 0.75137 (17)  | 0.80184 (14) | 0.52034 (13) | 0.0251 (2)                       | 0.9467 (10) |
| N10 | 0.08232 (17)  | 0.62977 (14) | 0.76714 (12) | 0.0233 (2)                       | 0.9467 (10) |
| C4B | 0.164 (3)     | 0.687 (2)    | 0.746 (2)    | 0.0216 (2)                       | 0.0533 (10) |
| C5B | 0.277 (3)     | 0.848 (2)    | 0.785 (2)    | 0.0221 (2)                       | 0.0533 (10) |
| C6B | 0.539 (3)     | 0.844 (3)    | 0.659 (2)    | 0.0215 (2)                       | 0.0533 (10) |
| O2B | 0.087 (3)     | 0.494 (2)    | 0.679 (2)    | 0.0362 (2)                       | 0.0533 (10) |
| O3B | -0.101 (3)    | 0.598 (4)    | 0.829 (3)    | 0.0313 (3)                       | 0.0533 (10) |
| O4B | 0.692 (3)     | 0.7029 (19)  | 0.504 (2)    | 0.0293 (2)                       | 0.0533 (10) |
| O5B | 0.814 (5)     | 0.872 (5)    | 0.537 (5)    | 0.0302 (3)                       | 0.0533 (10) |
| N4B | 0.392 (3)     | 0.775 (3)    | 0.691 (3)    | 0.0200 (2)                       | 0.0533 (10) |
| N5B | 0.324 (2)     | 0.6682 (19)  | 0.6599 (19)  | 0.0218 (2)                       | 0.0533 (10) |
| N6B | 0.130 (3)     | 0.787 (2)    | 0.825 (2)    | 0.0232 (2)                       | 0.0533 (10) |
| N7B | 0.353 (3)     | 0.950 (2)    | 0.810 (2)    | 0.0261 (2)                       | 0.0533 (10) |
| N8B | 0.518 (3)     | 0.949 (3)    | 0.726 (2)    | 0.0254 (2)                       | 0.0533 (10) |

|      |           |           |           |            |             |
|------|-----------|-----------|-----------|------------|-------------|
| N9B  | 0.046 (3) | 0.586 (2) | 0.753 (2) | 0.0251 (2) | 0.0533 (10) |
| N10B | 0.690 (3) | 0.802 (2) | 0.566 (2) | 0.0233 (2) | 0.0533 (10) |

*Atomic displacement parameters (Å<sup>2</sup>)*

|      | $U^{11}$   | $U^{22}$   | $U^{33}$   | $U^{12}$    | $U^{13}$    | $U^{23}$    |
|------|------------|------------|------------|-------------|-------------|-------------|
| C1   | 0.0292 (6) | 0.0210 (5) | 0.0210 (5) | -0.0058 (4) | -0.0002 (4) | -0.0083 (4) |
| C2   | 0.0270 (6) | 0.0246 (5) | 0.0217 (5) | -0.0069 (4) | 0.0008 (4)  | -0.0097 (4) |
| C3   | 0.0333 (7) | 0.0414 (8) | 0.0406 (8) | -0.0158 (6) | 0.0115 (6)  | -0.0154 (6) |
| N1   | 0.0372 (6) | 0.0324 (6) | 0.0315 (6) | -0.0146 (5) | 0.0113 (5)  | -0.0176 (5) |
| N2   | 0.0328 (6) | 0.0261 (5) | 0.0275 (5) | -0.0100 (4) | 0.0016 (4)  | -0.0101 (4) |
| N3   | 0.0277 (5) | 0.0248 (5) | 0.0230 (5) | -0.0061 (4) | -0.0006 (4) | -0.0080 (4) |
| O1   | 0.0334 (5) | 0.0236 (4) | 0.0243 (4) | -0.0089 (3) | 0.0028 (3)  | -0.0110 (3) |
| C4   | 0.0211 (6) | 0.0207 (5) | 0.0210 (5) | -0.0047 (4) | -0.0006 (4) | -0.0054 (4) |
| C5   | 0.0258 (6) | 0.0201 (5) | 0.0206 (5) | -0.0060 (5) | -0.0013 (4) | -0.0075 (4) |
| C6   | 0.0216 (6) | 0.0224 (6) | 0.0205 (5) | -0.0066 (5) | 0.0008 (4)  | -0.0070 (5) |
| O2   | 0.0311 (5) | 0.0428 (6) | 0.0412 (6) | -0.0121 (5) | 0.0115 (4)  | -0.0235 (5) |
| O3   | 0.0261 (7) | 0.0329 (6) | 0.0342 (6) | -0.0150 (5) | -0.0015 (5) | -0.0029 (5) |
| O4   | 0.0320 (5) | 0.0282 (5) | 0.0310 (5) | -0.0086 (4) | 0.0028 (4)  | -0.0150 (4) |
| O5   | 0.0260 (6) | 0.0345 (6) | 0.0333 (5) | -0.0141 (4) | 0.0060 (5)  | -0.0112 (4) |
| N4   | 0.0209 (6) | 0.0194 (5) | 0.0199 (5) | -0.0053 (4) | 0.0002 (4)  | -0.0074 (4) |
| N5   | 0.0208 (5) | 0.0230 (5) | 0.0217 (5) | -0.0055 (4) | 0.0026 (4)  | -0.0090 (4) |
| N6   | 0.0244 (5) | 0.0228 (5) | 0.0235 (5) | -0.0079 (4) | -0.0004 (4) | -0.0079 (4) |
| N7   | 0.0298 (6) | 0.0257 (5) | 0.0251 (5) | -0.0079 (4) | 0.0028 (4)  | -0.0124 (4) |
| N8   | 0.0268 (6) | 0.0262 (5) | 0.0241 (5) | -0.0074 (4) | 0.0029 (4)  | -0.0104 (4) |
| N9   | 0.0213 (5) | 0.0264 (5) | 0.0246 (5) | -0.0062 (4) | -0.0007 (4) | -0.0047 (4) |
| N10  | 0.0224 (5) | 0.0236 (5) | 0.0225 (5) | -0.0060 (4) | -0.0001 (4) | -0.0063 (4) |
| C4B  | 0.0211 (6) | 0.0207 (5) | 0.0210 (5) | -0.0047 (4) | -0.0006 (4) | -0.0054 (4) |
| C5B  | 0.0258 (6) | 0.0201 (5) | 0.0206 (5) | -0.0060 (5) | -0.0013 (4) | -0.0075 (4) |
| C6B  | 0.0216 (6) | 0.0224 (6) | 0.0205 (5) | -0.0066 (5) | 0.0008 (4)  | -0.0070 (5) |
| O2B  | 0.0311 (5) | 0.0428 (6) | 0.0412 (6) | -0.0121 (5) | 0.0115 (4)  | -0.0235 (5) |
| O3B  | 0.0261 (7) | 0.0329 (6) | 0.0342 (6) | -0.0150 (5) | -0.0015 (5) | -0.0029 (5) |
| O4B  | 0.0320 (5) | 0.0282 (5) | 0.0310 (5) | -0.0086 (4) | 0.0028 (4)  | -0.0150 (4) |
| O5B  | 0.0260 (6) | 0.0345 (6) | 0.0333 (5) | -0.0141 (4) | 0.0060 (5)  | -0.0112 (4) |
| N4B  | 0.0209 (6) | 0.0194 (5) | 0.0199 (5) | -0.0053 (4) | 0.0002 (4)  | -0.0074 (4) |
| N5B  | 0.0208 (5) | 0.0230 (5) | 0.0217 (5) | -0.0055 (4) | 0.0026 (4)  | -0.0090 (4) |
| N6B  | 0.0244 (5) | 0.0228 (5) | 0.0235 (5) | -0.0079 (4) | -0.0004 (4) | -0.0079 (4) |
| N7B  | 0.0298 (6) | 0.0257 (5) | 0.0251 (5) | -0.0079 (4) | 0.0028 (4)  | -0.0124 (4) |
| N8B  | 0.0268 (6) | 0.0262 (5) | 0.0241 (5) | -0.0074 (4) | 0.0029 (4)  | -0.0104 (4) |
| N9B  | 0.0213 (5) | 0.0264 (5) | 0.0246 (5) | -0.0062 (4) | -0.0007 (4) | -0.0047 (4) |
| N10B | 0.0224 (5) | 0.0236 (5) | 0.0225 (5) | -0.0060 (4) | -0.0001 (4) | -0.0063 (4) |

*Geometric parameters (Å, °)*

|        |             |         |             |
|--------|-------------|---------|-------------|
| C1—N1  | 1.3081 (18) | O2—N9   | 1.2241 (15) |
| C1—O1  | 1.3541 (14) | O3—N9   | 1.2326 (17) |
| C1—C2  | 1.3823 (17) | O4—N10  | 1.2328 (14) |
| C2—N3  | 1.3410 (17) | O5—N10  | 1.2362 (15) |
| C2—H2  | 0.9500      | N4—N5   | 1.3674 (14) |
| C3—N3  | 1.4691 (17) | N7—N8   | 1.3693 (17) |
| C3—H3A | 0.9800      | C4B—N6B | 1.330 (16)  |
| C3—H3B | 0.9800      | C4B—N5B | 1.355 (16)  |

|             |              |              |             |
|-------------|--------------|--------------|-------------|
| C3—H3C      | 0.9800       | C4B—N9B      | 1.450 (15)  |
| N1—H1A      | 0.854 (19)   | C5B—N7B      | 1.335 (15)  |
| N1—H1B      | 0.898 (19)   | C5B—N6B      | 1.336 (15)  |
| N2—N3       | 1.3000 (14)  | C5B—N4B      | 1.364 (16)  |
| N2—O1       | 1.3897 (15)  | C6B—N8B      | 1.301 (16)  |
| C4—N5       | 1.3334 (16)  | C6B—N4B      | 1.378 (15)  |
| C4—N6       | 1.3401 (16)  | C6B—N10B     | 1.381 (15)  |
| C4—N9       | 1.4552 (17)  | O2B—N9B      | 1.226 (16)  |
| C5—N6       | 1.3427 (18)  | O3B—N9B      | 1.234 (17)  |
| C5—N7       | 1.3478 (16)  | O4B—N10B     | 1.236 (16)  |
| C5—N4       | 1.3612 (16)  | O5B—N10B     | 1.240 (17)  |
| C6—N8       | 1.3201 (16)  | N4B—N5B      | 1.363 (15)  |
| C6—N4       | 1.3597 (16)  | N7B—N8B      | 1.377 (16)  |
| C6—N10      | 1.4102 (18)  |              |             |
| N1—C1—O1    | 118.73 (11)  | C4—N5—N4     | 97.84 (10)  |
| N1—C1—C2    | 134.08 (12)  | C4—N6—C5     | 99.31 (11)  |
| O1—C1—C2    | 107.19 (11)  | C5—N7—N8     | 105.45 (10) |
| N3—C2—C1    | 104.21 (10)  | C6—N8—N7     | 108.64 (11) |
| N3—C2—H2    | 127.9        | O2—N9—O3     | 124.89 (13) |
| C1—C2—H2    | 127.9        | O2—N9—C4     | 117.70 (12) |
| N3—C3—H3A   | 109.5        | O3—N9—C4     | 117.41 (13) |
| N3—C3—H3B   | 109.5        | O4—N10—O5    | 124.57 (12) |
| H3A—C3—H3B  | 109.5        | O4—N10—C6    | 117.27 (11) |
| N3—C3—H3C   | 109.5        | O5—N10—C6    | 118.16 (11) |
| H3A—C3—H3C  | 109.5        | N6B—C4B—N5B  | 120.0 (14)  |
| H3B—C3—H3C  | 109.5        | N6B—C4B—N9B  | 123.7 (14)  |
| C1—N1—H1A   | 122.6 (12)   | N5B—C4B—N9B  | 116.2 (14)  |
| C1—N1—H1B   | 120.9 (12)   | N7B—C5B—N6B  | 141.9 (16)  |
| H1A—N1—H1B  | 116.5 (16)   | N7B—C5B—N4B  | 109.6 (13)  |
| N3—N2—O1    | 103.41 (10)  | N6B—C5B—N4B  | 108.4 (13)  |
| N2—N3—C2    | 115.42 (11)  | N8B—C6B—N4B  | 112.3 (14)  |
| N2—N3—C3    | 118.19 (11)  | N8B—C6B—N10B | 125.4 (15)  |
| C2—N3—C3    | 126.39 (11)  | N4B—C6B—N10B | 122.3 (15)  |
| C1—O1—N2    | 109.77 (9)   | N5B—N4B—C5B  | 113.3 (12)  |
| N5—C4—N6    | 121.08 (12)  | N5B—N4B—C6B  | 143.1 (14)  |
| N5—C4—N9    | 118.34 (11)  | C5B—N4B—C6B  | 103.7 (12)  |
| N6—C4—N9    | 120.58 (11)  | C4B—N5B—N4B  | 96.8 (12)   |
| N6—C5—N7    | 138.53 (12)  | C4B—N6B—C5B  | 101.5 (14)  |
| N6—C5—N4    | 110.46 (11)  | C5B—N7B—N8B  | 108.3 (13)  |
| N7—C5—N4    | 111.01 (12)  | C6B—N8B—N7B  | 106.1 (14)  |
| N8—C6—N4    | 110.44 (12)  | O2B—N9B—O3B  | 120.3 (19)  |
| N8—C6—N10   | 124.41 (12)  | O2B—N9B—C4B  | 120.9 (16)  |
| N4—C6—N10   | 125.13 (12)  | O3B—N9B—C4B  | 118.7 (16)  |
| C6—N4—C5    | 104.46 (11)  | O4B—N10B—O5B | 121 (2)     |
| C6—N4—N5    | 144.23 (12)  | O4B—N10B—C6B | 120.0 (17)  |
| C5—N4—N5    | 111.32 (11)  | O5B—N10B—C6B | 119.2 (19)  |
| N1—C1—C2—N3 | -179.67 (14) | N8—C6—N10—O4 | 179.98 (12) |
| O1—C1—C2—N3 | -0.31 (13)   | N4—C6—N10—O4 | -1.42 (19)  |
| O1—N2—N3—C2 | -0.24 (13)   | N8—C6—N10—O5 | 0.32 (19)   |
| O1—N2—N3—C3 | 179.57 (10)  | N4—C6—N10—O5 | 178.92 (13) |

|              |              |                  |          |
|--------------|--------------|------------------|----------|
| C1—C2—N3—N2  | 0.36 (14)    | N7B—C5B—N4B—N5B  | 180 (2)  |
| C1—C2—N3—C3  | -179.44 (12) | N6B—C5B—N4B—N5B  | 2 (3)    |
| N1—C1—O1—N2  | 179.66 (11)  | N7B—C5B—N4B—C6B  | -1 (3)   |
| C2—C1—O1—N2  | 0.19 (13)    | N6B—C5B—N4B—C6B  | -179 (2) |
| N3—N2—O1—C1  | 0.02 (12)    | N8B—C6B—N4B—N5B  | 178 (3)  |
| N8—C6—N4—C5  | 0.43 (14)    | N10B—C6B—N4B—N5B | -2 (5)   |
| N10—C6—N4—C5 | -178.33 (12) | N8B—C6B—N4B—C5B  | 0 (3)    |
| N8—C6—N4—N5  | -179.40 (17) | N10B—C6B—N4B—C5B | 180 (2)  |
| N10—C6—N4—N5 | 1.8 (3)      | N6B—C4B—N5B—N4B  | -1 (3)   |
| N6—C5—N4—C6  | 179.40 (11)  | N9B—C4B—N5B—N4B  | -177 (2) |
| N7—C5—N4—C6  | -0.43 (14)   | C5B—N4B—N5B—C4B  | -1 (3)   |
| N6—C5—N4—N5  | -0.71 (15)   | C6B—N4B—N5B—C4B  | -179 (4) |
| N7—C5—N4—N5  | 179.46 (10)  | N5B—C4B—N6B—C5B  | 2 (3)    |
| N6—C4—N5—N4  | -0.29 (15)   | N9B—C4B—N6B—C5B  | 178 (2)  |
| N9—C4—N5—N4  | -179.99 (10) | N7B—C5B—N6B—C4B  | -179 (3) |
| C6—N4—N5—C4  | -179.61 (18) | N4B—C5B—N6B—C4B  | -3 (3)   |
| C5—N4—N5—C4  | 0.56 (13)    | N6B—C5B—N7B—N8B  | 179 (3)  |
| N5—C4—N6—C5  | -0.10 (15)   | N4B—C5B—N7B—N8B  | 3 (3)    |
| N9—C4—N6—C5  | 179.59 (11)  | N4B—C6B—N8B—N7B  | 2 (3)    |
| N7—C5—N6—C4  | -179.77 (15) | N10B—C6B—N8B—N7B | -178 (2) |
| N4—C5—N6—C4  | 0.46 (13)    | C5B—N7B—N8B—C6B  | -2 (3)   |
| N6—C5—N7—N8  | -179.49 (15) | N6B—C4B—N9B—O2B  | -179 (2) |
| N4—C5—N7—N8  | 0.28 (14)    | N5B—C4B—N9B—O2B  | -3 (3)   |
| N4—C6—N8—N7  | -0.28 (14)   | N6B—C4B—N9B—O3B  | 4 (4)    |
| N10—C6—N8—N7 | 178.50 (11)  | N5B—C4B—N9B—O3B  | -180 (2) |
| C5—N7—N8—C6  | 0.00 (14)    | N8B—C6B—N10B—O4B | -178 (2) |
| N5—C4—N9—O2  | 1.68 (17)    | N4B—C6B—N10B—O4B | 3 (4)    |
| N6—C4—N9—O2  | -178.02 (12) | N8B—C6B—N10B—O5B | -3 (4)   |
| N5—C4—N9—O3  | -178.61 (14) | N4B—C6B—N10B—O5B | 177 (3)  |
| N6—C4—N9—O3  | 1.69 (19)    |                  |          |

## Hydrogen-bond geometry (Å, °)

| <i>D</i> —H... <i>A</i>     | <i>D</i> —H | H... <i>A</i> | <i>D</i> ... <i>A</i> | <i>D</i> —H... <i>A</i> |
|-----------------------------|-------------|---------------|-----------------------|-------------------------|
| C2—H2...N6 <sup>i</sup>     | 0.95        | 2.42          | 3.2951 (17)           | 154                     |
| C2—H2...N7B <sup>i</sup>    | 0.95        | 2.58          | 3.111 (15)            | 116                     |
| C2—H2...N8B <sup>i</sup>    | 0.95        | 1.95          | 2.789 (18)            | 147                     |
| C3—H3A...O4 <sup>ii</sup>   | 0.98        | 2.60          | 3.4557 (18)           | 146                     |
| C3—H3C...O2B <sup>iii</sup> | 0.98        | 2.05          | 2.88 (2)              | 140                     |
| C3—H3C...O3B <sup>iii</sup> | 0.98        | 2.45          | 3.38 (2)              | 159                     |
| C3—H3C...N9B <sup>iii</sup> | 0.98        | 2.59          | 3.544 (16)            | 165                     |
| N1—H1A...O5 <sup>iv</sup>   | 0.854 (19)  | 2.342 (19)    | 3.1010 (17)           | 148.3 (15)              |
| N1—H1A...N8 <sup>iv</sup>   | 0.854 (19)  | 2.330 (18)    | 3.0269 (17)           | 139.1 (15)              |
| N1—H1A...O3B <sup>iv</sup>  | 0.854 (19)  | 2.58 (3)      | 3.29 (2)              | 141.3 (16)              |
| N1—H1A...N6B <sup>iv</sup>  | 0.854 (19)  | 2.56 (3)      | 3.342 (17)            | 152.5 (16)              |
| N1—H1B...N7 <sup>i</sup>    | 0.898 (19)  | 2.02 (2)      | 2.9131 (16)           | 173.9 (17)              |
| N1—H1B...N7B <sup>i</sup>   | 0.898 (19)  | 1.97 (2)      | 2.748 (15)            | 144.0 (17)              |

Symmetry codes: (i) *x*, *y*-1, *z*; (ii) -*x*+1, -*y*+1, -*z*+1; (iii) *x*+1, *y*, *z*; (iv) -*x*, -*y*+1, -*z*+2.

**Compound 6: MSI tetrazole azasydnone**

**Compound 6**  
CCDC-2035560

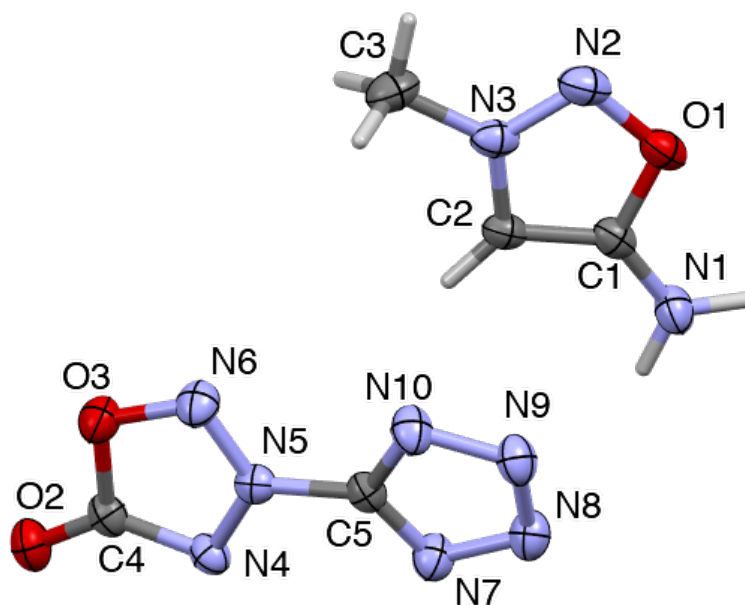

**Fig. 5** Molecular unit of 5-amino-3-methyl-1,2,3-oxadiazolium TAZ (6). Ellipsoids are drawn at the 50% probability level.

## Title

Matthias Zeller,\* Davin Piercey and Matthew Gettings

Department of Chemistry, Purdue University, 560 Oval Dr., W. Lafayette, IN 47907-2084, USA

Correspondence email: zeller4@purdue.edu

## Abstract

## Table 1

## Experimental details

|                                                                                                                |                                                                                                                                                                                                                               |
|----------------------------------------------------------------------------------------------------------------|-------------------------------------------------------------------------------------------------------------------------------------------------------------------------------------------------------------------------------|
| Crystal data                                                                                                   |                                                                                                                                                                                                                               |
| Chemical formula                                                                                               | C <sub>2</sub> N <sub>7</sub> O <sub>2</sub> ·C <sub>3</sub> H <sub>6</sub> N <sub>3</sub> O                                                                                                                                  |
| <i>M</i> <sub>r</sub>                                                                                          | 254.20                                                                                                                                                                                                                        |
| Crystal system, space group                                                                                    | Orthorhombic, <i>P</i> 2 <sub>1</sub> 2 <sub>1</sub> 2 <sub>1</sub>                                                                                                                                                           |
| Temperature (K)                                                                                                | 150                                                                                                                                                                                                                           |
| <i>a</i> , <i>b</i> , <i>c</i> (Å)                                                                             | 5.2488 (8), 13.9673 (14), 14.1051 (18)                                                                                                                                                                                        |
| <i>V</i> (Å <sup>3</sup> )                                                                                     | 1034.1 (2)                                                                                                                                                                                                                    |
| <i>Z</i>                                                                                                       | 4                                                                                                                                                                                                                             |
| Radiation type                                                                                                 | Mo <i>K</i> α                                                                                                                                                                                                                 |
| <i>μ</i> (mm <sup>-1</sup> )                                                                                   | 0.14                                                                                                                                                                                                                          |
| Crystal size (mm)                                                                                              | 0.21 × 0.11 × 0.05                                                                                                                                                                                                            |
| Data collection                                                                                                |                                                                                                                                                                                                                               |
| Diffractionmeter                                                                                               | Bruker AXS D8 Quest<br>diffractometer with PhotonII charge-integrating pixel array detector (CPAD)                                                                                                                            |
| Absorption correction                                                                                          | Multi-scan<br><i>SADABS</i> 2016/2: Krause, L., Herbst-Irmer, R., Sheldrick G.M. & Stalke D., <i>J. Appl. Cryst.</i> 48 (2015) 3-10                                                                                           |
| <i>T</i> <sub>min</sub> , <i>T</i> <sub>max</sub>                                                              | 0.607, 0.746                                                                                                                                                                                                                  |
| No. of measured,<br>independent and<br>observed [ <i>I</i> > 2σ( <i>I</i> )]<br>reflections                    | 19772, 3434, 2584                                                                                                                                                                                                             |
| <i>R</i> <sub>int</sub>                                                                                        | 0.073                                                                                                                                                                                                                         |
| (sin θ/λ) <sub>max</sub> (Å <sup>-1</sup> )                                                                    | 0.736                                                                                                                                                                                                                         |
| Refinement                                                                                                     |                                                                                                                                                                                                                               |
| <i>R</i> [ <i>F</i> <sup>2</sup> > 2σ( <i>F</i> <sup>2</sup> )], <i>wR</i> ( <i>F</i> <sup>2</sup> ), <i>S</i> | 0.040, 0.097, 1.01                                                                                                                                                                                                            |
| No. of reflections                                                                                             | 3434                                                                                                                                                                                                                          |
| No. of parameters                                                                                              | 164                                                                                                                                                                                                                           |
| H-atom treatment                                                                                               | H-atom parameters constrained                                                                                                                                                                                                 |
| Δρ <sub>max</sub> , Δρ <sub>min</sub> (e Å <sup>-3</sup> )                                                     | 0.27, -0.21                                                                                                                                                                                                                   |
| Absolute structure                                                                                             | Flack <i>x</i> determined using 889 quotients [( <i>I</i> <sup>+</sup> )-( <i>I</i> <sup>-</sup> )]/[( <i>I</i> <sup>+</sup> )+( <i>I</i> <sup>-</sup> )] (Parsons, Flack and Wagner, <i>Acta Cryst.</i> B69 (2013) 249-259). |
| Absolute structure parameter                                                                                   | 0.3 (8)                                                                                                                                                                                                                       |

Computer programs: Apex3 v2019.1-0 (Bruker, 2019), *SAINTE* V8.40A (Bruker, 2019), *SHELXS97* (Sheldrick, 2008), *SHELXL2018/3* (Sheldrick, 2015, 2018), *SHELXL* Rev1146 (Hübschle *et al.*, 2011).



**Table 2**

Hydrogen-bond geometry (Å, °)

| <i>D</i> —H··· <i>A</i>             | <i>D</i> —H | H··· <i>A</i> | <i>D</i> ··· <i>A</i> | <i>D</i> —H··· <i>A</i> |
|-------------------------------------|-------------|---------------|-----------------------|-------------------------|
| N1—H1 <i>A</i> ···N8 <sup>i</sup>   | 0.88        | 2.09          | 2.942 (3)             | 164                     |
| N1—H1 <i>B</i> ···N9                | 0.88        | 2.08          | 2.903 (3)             | 156                     |
| C2—H2···O2 <sup>ii</sup>            | 0.95        | 2.54          | 3.254 (3)             | 132                     |
| C2—H2···N10                         | 0.95        | 2.54          | 3.332 (3)             | 140                     |
| C3—H3 <i>A</i> ···N7 <sup>iii</sup> | 0.98        | 2.53          | 3.493 (3)             | 169                     |
| C3—H3 <i>B</i> ···N7 <sup>iv</sup>  | 0.98        | 2.50          | 3.250 (3)             | 133                     |
| C3—H3 <i>C</i> ···O2 <sup>v</sup>   | 0.98        | 2.59          | 3.110 (3)             | 113                     |

Symmetry codes: (i)  $x-1/2, -y+3/2, -z+2$ ; (ii)  $x-1/2, -y+3/2, -z+1$ ; (iii)  $-x, y-1/2, -z+3/2$ ; (iv)  $-x+1, y-1/2, -z+3/2$ ; (v)  $x-3/2, -y+3/2, -z+1$ .**Acknowledgements**

This material is based upon work supported by the National Science Foundation through the Major Research Instrumentation Program under Grant No. CHE 1625543. (Funding for the single-crystal X-ray diffractometer).

**Funding information****References**

- Allen, F. H., Johnson, O., Shields, G. P., Smith, B. R. & Towler, M. (2004). *J. Appl. Cryst.*, **37**, 335–338.
- Bruker (2019). Apex3 v2019.1-0, *SAINT* V8.40A, Bruker AXS Inc.: Madison (WI), USA, 2019.
- CSD: Groom, C. R. & Allen, F. H. (2014). *Angew. Chem. Int. Ed.*, **53**, 662–671.
- Hübschle, C. B., Sheldrick, G. M. & Dittrich, B. (2011). *J. Appl. Cryst.*, **44**, 1281–1284.
- publCIF*: Westrip, S. P. (2010). *J. Appl. Cryst.*, **43**, 920–925.
- Sheldrick, G. M. (2008). *Acta Cryst.*, **A64**, 112–122.
- Sheldrick, G. M. (2012). *TWINABS*. Ver. 2012/1.
- Sheldrick, G. M. (2015). "Crystal structure refinement with *SHELXL*", *Acta Cryst.*, **C71**, 3–8.
- Sheldrick, G. M. (2015). "*SHELXT*—Integrated space-group and crystal-structure determination", *Acta Cryst.* **A71**, 3–8.
- Sheldrick, G. M. (2018). *SHELXL2018*. University of Göttingen, Germany.
- Spek, A. L. (2003). *J. Appl. Cryst.*, **36**, 7–13.

**Figure 1**

## supporting information

## Title

## Computing details

Data collection: Apex3 v2019.1-0 (Bruker, 2019); cell refinement: *SAINTE* V8.40A (Bruker, 2019); data reduction: *SAINTE* V8.40A (Bruker, 2019); program(s) used to solve structure: *SHELXS97* (Sheldrick, 2008); program(s) used to refine structure: *SHELXL2018/3* (Sheldrick, 2015, 2018), *SHELXLE* Rev1146 (Hübschle *et al.*, 2011).

## (G117d\_MSI\_TAZ\_EtOH\_0m)

## Crystal data

$C_2N_7O_2 \cdot C_3H_6N_3O$   
 $M_r = 254.20$   
Orthorhombic,  $P2_12_12_1$   
 $a = 5.2488$  (8) Å  
 $b = 13.9673$  (14) Å  
 $c = 14.1051$  (18) Å  
 $V = 1034.1$  (2) Å<sup>3</sup>  
 $Z = 4$   
 $F(000) = 520$

$D_x = 1.633$  Mg m<sup>-3</sup>  
Mo  $K\alpha$  radiation,  $\lambda = 0.71073$  Å  
Cell parameters from 5415 reflections  
 $\theta = 2.9$ – $30.6^\circ$   
 $\mu = 0.14$  mm<sup>-1</sup>  
 $T = 150$  K  
Fragment, colourless  
 $0.21 \times 0.11 \times 0.05$  mm

## Data collection

Bruker AXS D8 Quest  
diffractometer with PhotonII charge-integrating pixel  
array detector (CPAD)  
Radiation source: fine focus sealed tube X-ray source  
Triumph curved graphite crystal monochromator  
Detector resolution: 7.4074 pixels mm<sup>-1</sup>  
 $\omega$  and phi scans

Absorption correction: multi-scan  
*SADABS* 2016/2: Krause, L., Herbst-Irmer, R.,  
Sheldrick G.M. & Stalke D., *J. Appl. Cryst.* 48 (2015)  
3-10  
 $T_{\min} = 0.607$ ,  $T_{\max} = 0.746$   
19772 measured reflections  
3434 independent reflections  
2584 reflections with  $I > 2\sigma(I)$   
 $R_{\text{int}} = 0.073$   
 $\theta_{\max} = 31.5^\circ$ ,  $\theta_{\min} = 2.9^\circ$   
 $h = -7 \rightarrow 7$   
 $k = -18 \rightarrow 20$   
 $l = -20 \rightarrow 20$

## Refinement

Refinement on  $F^2$   
Least-squares matrix: full  
 $R[F^2 > 2\sigma(F^2)] = 0.040$   
 $wR(F^2) = 0.097$   
 $S = 1.01$   
3434 reflections  
164 parameters  
0 restraints  
Primary atom site location: structure-invariant direct  
methods  
Secondary atom site location: difference Fourier map

Hydrogen site location: inferred from neighbouring  
sites  
H-atom parameters constrained  
 $w = 1/[\sigma^2(F_o^2) + (0.0344P)^2 + 0.2762P]$   
where  $P = (F_o^2 + 2F_c^2)/3$   
 $(\Delta/\sigma)_{\max} < 0.001$   
 $\Delta\rho_{\max} = 0.27$  e Å<sup>-3</sup>  
 $\Delta\rho_{\min} = -0.21$  e Å<sup>-3</sup>  
Absolute structure: Flack x determined using 889  
quotients  $[(I^+)-(I^-)]/[(I^+)+(I^-)]$  (Parsons, Flack and  
Wagner, *Acta Cryst.* B69 (2013) 249-259).  
Absolute structure parameter: 0.3 (8)

*Special details*

*Geometry.* All e.s.d.'s (except the e.s.d. in the dihedral angle between two l.s. planes) are estimated using the full covariance matrix. The cell e.s.d.'s are taken into account individually in the estimation of e.s.d.'s in distances, angles and torsion angles; correlations between e.s.d.'s in cell parameters are only used when they are defined by crystal symmetry. An approximate (isotropic) treatment of cell e.s.d.'s is used for estimating e.s.d.'s involving l.s. planes.

*Fractional atomic coordinates and isotropic or equivalent isotropic displacement parameters ( $\text{\AA}^2$ )*

|     | <i>x</i>    | <i>y</i>     | <i>z</i>     | $U_{\text{iso}}^*/U_{\text{eq}}$ |
|-----|-------------|--------------|--------------|----------------------------------|
| O1  | −0.1296 (3) | 0.56228 (12) | 0.94960 (12) | 0.0332 (4)                       |
| O2  | 0.7501 (4)  | 0.95350 (12) | 0.40370 (12) | 0.0373 (4)                       |
| O3  | 0.4686 (3)  | 0.84396 (12) | 0.46206 (12) | 0.0330 (4)                       |
| N1  | 0.2371 (4)  | 0.65170 (13) | 0.95988 (14) | 0.0331 (4)                       |
| H1A | 0.214738    | 0.655591     | 1.021592     | 0.040*                           |
| H1B | 0.369504    | 0.679452     | 0.933264     | 0.040*                           |
| N2  | −0.2753 (4) | 0.51637 (15) | 0.88088 (16) | 0.0360 (5)                       |
| N3  | −0.1549 (4) | 0.53455 (13) | 0.80265 (15) | 0.0290 (4)                       |
| N4  | 0.7796 (4)  | 0.89339 (12) | 0.55828 (13) | 0.0260 (4)                       |
| N5  | 0.6223 (3)  | 0.83078 (12) | 0.59714 (13) | 0.0236 (4)                       |
| N6  | 0.4369 (4)  | 0.79859 (14) | 0.54701 (14) | 0.0319 (4)                       |
| N7  | 0.7944 (4)  | 0.85058 (13) | 0.75210 (14) | 0.0310 (4)                       |
| N8  | 0.7479 (4)  | 0.80798 (13) | 0.83542 (13) | 0.0318 (4)                       |
| N9  | 0.5785 (4)  | 0.73962 (14) | 0.82339 (14) | 0.0322 (4)                       |
| N10 | 0.5076 (4)  | 0.73465 (14) | 0.73228 (14) | 0.0323 (5)                       |
| C1  | 0.0730 (4)  | 0.60454 (15) | 0.90759 (16) | 0.0268 (4)                       |
| C2  | 0.0565 (4)  | 0.58722 (15) | 0.81171 (17) | 0.0265 (4)                       |
| H2  | 0.169215    | 0.607911     | 0.763168     | 0.032*                           |
| C3  | −0.2648 (5) | 0.49785 (19) | 0.7134 (2)   | 0.0386 (6)                       |
| H3A | −0.425035   | 0.464566     | 0.726935     | 0.058*                           |
| H3B | −0.144703   | 0.453213     | 0.683759     | 0.058*                           |
| H3C | −0.297435   | 0.551426     | 0.670190     | 0.058*                           |
| C4  | 0.6861 (4)  | 0.90443 (15) | 0.46992 (16) | 0.0261 (4)                       |
| C5  | 0.6452 (4)  | 0.80346 (15) | 0.69362 (15) | 0.0238 (4)                       |

*Atomic displacement parameters ( $\text{\AA}^2$ )*

|     | $U^{11}$    | $U^{22}$    | $U^{33}$    | $U^{12}$    | $U^{13}$    | $U^{23}$    |
|-----|-------------|-------------|-------------|-------------|-------------|-------------|
| O1  | 0.0278 (8)  | 0.0351 (8)  | 0.0366 (9)  | 0.0031 (7)  | 0.0090 (7)  | 0.0086 (7)  |
| O2  | 0.0448 (10) | 0.0399 (9)  | 0.0272 (8)  | −0.0006 (9) | 0.0041 (8)  | 0.0059 (7)  |
| O3  | 0.0377 (9)  | 0.0329 (8)  | 0.0284 (9)  | −0.0046 (7) | −0.0053 (7) | 0.0020 (7)  |
| N1  | 0.0393 (11) | 0.0350 (10) | 0.0250 (9)  | −0.0044 (9) | 0.0053 (9)  | 0.0012 (8)  |
| N2  | 0.0252 (9)  | 0.0365 (10) | 0.0463 (12) | 0.0003 (8)  | 0.0048 (9)  | 0.0093 (9)  |
| N3  | 0.0228 (9)  | 0.0259 (9)  | 0.0383 (11) | 0.0009 (7)  | 0.0004 (8)  | 0.0067 (8)  |
| N4  | 0.0274 (9)  | 0.0236 (8)  | 0.0270 (9)  | −0.0032 (8) | 0.0043 (8)  | 0.0001 (7)  |
| N5  | 0.0244 (9)  | 0.0197 (8)  | 0.0267 (9)  | 0.0001 (7)  | 0.0003 (7)  | −0.0018 (7) |
| N6  | 0.0359 (10) | 0.0298 (9)  | 0.0300 (10) | −0.0082 (9) | −0.0034 (9) | 0.0008 (8)  |
| N7  | 0.0366 (11) | 0.0279 (9)  | 0.0284 (10) | −0.0045 (8) | −0.0018 (8) | 0.0019 (7)  |
| N8  | 0.0398 (11) | 0.0286 (9)  | 0.0270 (10) | −0.0002 (9) | −0.0015 (9) | 0.0006 (7)  |
| N9  | 0.0417 (11) | 0.0288 (9)  | 0.0262 (10) | −0.0023 (9) | 0.0033 (8)  | 0.0047 (8)  |
| N10 | 0.0405 (12) | 0.0283 (9)  | 0.0279 (10) | −0.0087 (9) | 0.0019 (8)  | 0.0023 (8)  |
| C1  | 0.0263 (10) | 0.0230 (9)  | 0.0310 (11) | 0.0036 (8)  | 0.0061 (9)  | 0.0057 (9)  |
| C2  | 0.0211 (10) | 0.0252 (10) | 0.0334 (12) | 0.0003 (8)  | 0.0030 (9)  | 0.0043 (9)  |

|    |             |             |             |              |              |             |
|----|-------------|-------------|-------------|--------------|--------------|-------------|
| C3 | 0.0289 (12) | 0.0392 (12) | 0.0477 (15) | -0.0040 (11) | -0.0087 (11) | 0.0020 (11) |
| C4 | 0.0302 (11) | 0.0215 (9)  | 0.0264 (11) | 0.0014 (8)   | 0.0044 (8)   | -0.0016 (8) |
| C5 | 0.0267 (10) | 0.0202 (9)  | 0.0245 (10) | 0.0025 (8)   | 0.0033 (9)   | 0.0009 (8)  |

*Geometric parameters (Å, °)*

|              |              |              |              |
|--------------|--------------|--------------|--------------|
| O1—C1        | 1.353 (3)    | N5—N6        | 1.284 (3)    |
| O1—N2        | 1.391 (3)    | N5—C5        | 1.418 (3)    |
| O2—C4        | 1.206 (3)    | N7—C5        | 1.314 (3)    |
| O3—N6        | 1.366 (3)    | N7—N8        | 1.340 (3)    |
| O3—C4        | 1.425 (3)    | N8—N9        | 1.315 (3)    |
| N1—C1        | 1.311 (3)    | N9—N10       | 1.340 (3)    |
| N1—H1A       | 0.8800       | N10—C5       | 1.320 (3)    |
| N1—H1B       | 0.8800       | C1—C2        | 1.377 (3)    |
| N2—N3        | 1.297 (3)    | C2—H2        | 0.9500       |
| N3—C2        | 1.338 (3)    | C3—H3A       | 0.9800       |
| N3—C3        | 1.477 (3)    | C3—H3B       | 0.9800       |
| N4—N5        | 1.322 (2)    | C3—H3C       | 0.9800       |
| N4—C4        | 1.348 (3)    |              |              |
| C1—O1—N2     | 109.16 (18)  | N1—C1—O1     | 119.3 (2)    |
| N6—O3—C4     | 107.73 (17)  | N1—C1—C2     | 133.0 (2)    |
| C1—N1—H1A    | 120.0        | O1—C1—C2     | 107.7 (2)    |
| C1—N1—H1B    | 120.0        | N3—C2—C1     | 104.1 (2)    |
| H1A—N1—H1B   | 120.0        | N3—C2—H2     | 128.0        |
| N3—N2—O1     | 103.57 (18)  | C1—C2—H2     | 128.0        |
| N2—N3—C2     | 115.5 (2)    | N3—C3—H3A    | 109.5        |
| N2—N3—C3     | 117.9 (2)    | N3—C3—H3B    | 109.5        |
| C2—N3—C3     | 126.6 (2)    | H3A—C3—H3B   | 109.5        |
| N5—N4—C4     | 103.40 (18)  | N3—C3—H3C    | 109.5        |
| N6—N5—N4     | 118.47 (19)  | H3A—C3—H3C   | 109.5        |
| N6—N5—C5     | 119.87 (18)  | H3B—C3—H3C   | 109.5        |
| N4—N5—C5     | 121.54 (18)  | O2—C4—N4     | 132.8 (2)    |
| N5—N6—O3     | 103.19 (18)  | O2—C4—O3     | 120.0 (2)    |
| C5—N7—N8     | 102.67 (19)  | N4—C4—O3     | 107.20 (18)  |
| N9—N8—N7     | 109.43 (19)  | N7—C5—N10    | 115.6 (2)    |
| N8—N9—N10    | 110.44 (18)  | N7—C5—N5     | 121.18 (19)  |
| C5—N10—N9    | 101.90 (19)  | N10—C5—N5    | 123.1 (2)    |
| C1—O1—N2—N3  | -0.7 (2)     | N1—C1—C2—N3  | 180.0 (2)    |
| O1—N2—N3—C2  | 0.4 (2)      | O1—C1—C2—N3  | -0.6 (2)     |
| O1—N2—N3—C3  | -178.28 (18) | N5—N4—C4—O2  | 178.8 (2)    |
| C4—N4—N5—N6  | 0.0 (2)      | N5—N4—C4—O3  | -0.2 (2)     |
| C4—N4—N5—C5  | -176.13 (18) | N6—O3—C4—O2  | -178.74 (19) |
| N4—N5—N6—O3  | 0.3 (2)      | N6—O3—C4—N4  | 0.4 (2)      |
| C5—N5—N6—O3  | 176.48 (17)  | N8—N7—C5—N10 | 0.0 (3)      |
| C4—O3—N6—N5  | -0.4 (2)     | N8—N7—C5—N5  | 175.47 (19)  |
| C5—N7—N8—N9  | 0.0 (3)      | N9—N10—C5—N7 | 0.0 (3)      |
| N7—N8—N9—N10 | 0.0 (3)      | N9—N10—C5—N5 | -175.4 (2)   |
| N8—N9—N10—C5 | 0.0 (3)      | N6—N5—C5—N7  | -164.5 (2)   |
| N2—O1—C1—N1  | -179.66 (19) | N4—N5—C5—N7  | 11.6 (3)     |
| N2—O1—C1—C2  | 0.9 (2)      | N6—N5—C5—N10 | 10.6 (3)     |

---

|             |           |              |            |
|-------------|-----------|--------------|------------|
| N2—N3—C2—C1 | 0.1 (2)   | N4—N5—C5—N10 | -173.3 (2) |
| C3—N3—C2—C1 | 178.7 (2) |              |            |

---

*Hydrogen-bond geometry (Å, °)*

---

| <i>D</i> —H $\cdots$ <i>A</i>     | <i>D</i> —H | H $\cdots$ <i>A</i> | <i>D</i> $\cdots$ <i>A</i> | <i>D</i> —H $\cdots$ <i>A</i> |
|-----------------------------------|-------------|---------------------|----------------------------|-------------------------------|
| N1—H1A $\cdots$ N8 <sup>i</sup>   | 0.88        | 2.09                | 2.942 (3)                  | 164                           |
| N1—H1B $\cdots$ N9                | 0.88        | 2.08                | 2.903 (3)                  | 156                           |
| C2—H2 $\cdots$ O2 <sup>ii</sup>   | 0.95        | 2.54                | 3.254 (3)                  | 132                           |
| C2—H2 $\cdots$ N10                | 0.95        | 2.54                | 3.332 (3)                  | 140                           |
| C3—H3A $\cdots$ N7 <sup>iii</sup> | 0.98        | 2.53                | 3.493 (3)                  | 169                           |
| C3—H3B $\cdots$ N7 <sup>iv</sup>  | 0.98        | 2.50                | 3.250 (3)                  | 133                           |
| C3—H3C $\cdots$ O2 <sup>v</sup>   | 0.98        | 2.59                | 3.110 (3)                  | 113                           |

---

Symmetry codes: (i)  $x-1/2, -y+3/2, -z+2$ ; (ii)  $x-1/2, -y+3/2, -z+1$ ; (iii)  $-x, y-1/2, -z+3/2$ ; (iv)  $-x+1, y-1/2, -z+3/2$ ; (v)  $x-3/2, -y+3/2, -z+1$ .

## Compound 7: MSI azidotetrazole

### Compound 7

CCDC-2025853

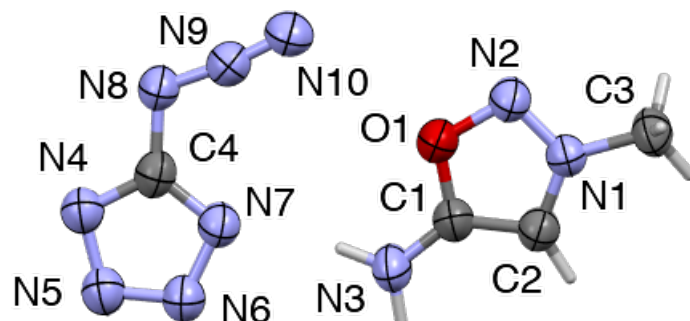

**Fig. 6** Molecular unit of 5-amino-3-methyl-1,2,3-oxadiazolium azidotetrazolate (**7**). Ellipsoids are drawn at the 50% probability level.

## Title

Matthias Zeller,\* Matthew Gettings and Davin Piercey

Department of Chemistry, Purdue University, 560 Oval Dr., W. Lafayette, IN 47907-2084, USA

Correspondence email: zeller4@purdue.edu

## Abstract

## Table 1

## Experimental details

|                                                                            |                                                                                                                                     |
|----------------------------------------------------------------------------|-------------------------------------------------------------------------------------------------------------------------------------|
| Crystal data                                                               |                                                                                                                                     |
| Chemical formula                                                           | CN <sub>7</sub> C <sub>3</sub> H <sub>6</sub> N <sub>3</sub> O                                                                      |
| $M_r$                                                                      | 210.19                                                                                                                              |
| Crystal system, space group                                                | Monoclinic, $P2_1/n$                                                                                                                |
| Temperature (K)                                                            | 150                                                                                                                                 |
| $a, b, c$ (Å)                                                              | 8.4296 (13), 5.5977 (9), 19.058 (3)                                                                                                 |
| $\beta$ (°)                                                                | 96.392 (10)                                                                                                                         |
| $V$ (Å <sup>3</sup> )                                                      | 893.7 (2)                                                                                                                           |
| $Z$                                                                        | 4                                                                                                                                   |
| Radiation type                                                             | Cu $K\alpha$                                                                                                                        |
| $\mu$ (mm <sup>-1</sup> )                                                  | 1.07                                                                                                                                |
| Crystal size (mm)                                                          | 0.15 × 0.02 × 0.01                                                                                                                  |
| Data collection                                                            |                                                                                                                                     |
| Diffractometer                                                             | Bruker AXS D8 Quest diffractometer with PhotonIII_C14 charge-integrating and photon counting pixel array detector                   |
| Absorption correction                                                      | Multi-scan<br><i>SADABS</i> 2016/2: Krause, L., Herbst-Irmer, R., Sheldrick G.M. & Stalke D., <i>J. Appl. Cryst.</i> 48 (2015) 3-10 |
| $T_{\min}, T_{\max}$                                                       | 0.502, 0.754                                                                                                                        |
| No. of measured, independent and observed [ $I > 2\sigma(I)$ ] reflections | 7434, 1744, 735                                                                                                                     |
| $R_{\text{int}}$                                                           | 0.182                                                                                                                               |
| $(\sin \theta/\lambda)_{\text{max}}$ (Å <sup>-1</sup> )                    | 0.618                                                                                                                               |
| Refinement                                                                 |                                                                                                                                     |
| $R[F^2 > 2\sigma(F^2)], wR(F^2), S$                                        | 0.092, 0.301, 0.97                                                                                                                  |
| No. of reflections                                                         | 1744                                                                                                                                |
| No. of parameters                                                          | 137                                                                                                                                 |
| H-atom treatment                                                           | H-atom parameters constrained                                                                                                       |
| $\Delta\rho_{\text{max}}, \Delta\rho_{\text{min}}$ (e Å <sup>-3</sup> )    | 0.28, -0.45                                                                                                                         |

Computer programs: Apex3 v2019.1-0 (Bruker, 2019), *SAINTE* V8.40A (Bruker, 2019), *SHELXS97* (Sheldrick, 2008), *SHELXL2018/3* (Sheldrick, 2015, 2018), *SHELXLE* Rev1117 (Hübschle *et al.*, 2011).

**Table 2**

Hydrogen-bond geometry (Å, °)

| <i>D</i> —H··· <i>A</i>             | <i>D</i> —H | H··· <i>A</i> | <i>D</i> ··· <i>A</i> | <i>D</i> —H··· <i>A</i> |
|-------------------------------------|-------------|---------------|-----------------------|-------------------------|
| N3—H3 <i>A</i> ···N6                | 0.88        | 2.69          | 3.417 (7)             | 141                     |
| N3—H3 <i>A</i> ···N7                | 0.88        | 2.03          | 2.898 (7)             | 169                     |
| N3—H3 <i>B</i> ···N6 <sup>i</sup>   | 0.88        | 2.03          | 2.883 (8)             | 164                     |
| C3—H3 <i>C</i> ···N10 <sup>ii</sup> | 0.98        | 2.63          | 3.365 (9)             | 132                     |
| C3—H3 <i>D</i> ···N4 <sup>iii</sup> | 0.98        | 2.47          | 3.419 (9)             | 163                     |
| C3—H3 <i>D</i> ···N5 <sup>iii</sup> | 0.98        | 2.53          | 3.429 (9)             | 153                     |
| C3—H3 <i>E</i> ···N5 <sup>iv</sup>  | 0.98        | 2.67          | 3.313 (8)             | 123                     |

Symmetry codes: (i)  $-x+2, -y+2, -z+1$ ; (ii)  $-x+1, -y, -z+1$ ; (iii)  $x-1/2, -y+3/2, z+1/2$ ; (iv)  $-x+2, -y+1, -z+1$ .**Acknowledgements**

This material is based upon work supported by the National Science Foundation through the Major Research Instrumentation Program under Grant No. CHE 1625543. (Funding for the single-crystal X-ray diffractometer).

**Funding information****References**

- Allen, F. H., Johnson, O., Shields, G. P., Smith, B. R. & Towler, M. (2004). *J. Appl. Cryst.*, **37**, 335–338.
- Bruker (2019). Apex3 v2019.1-0, *SAINT* V8.40A, Bruker Nano Inc.: Madison (WI), USA, 2019.
- CSD: Groom, C. R. & Allen, F. H. (2014). *Angew. Chem. Int. Ed.*, **53**, 662–671.
- Hübschle, C. B., Sheldrick, G. M. & Dittrich, B. (2011). *J. Appl. Cryst.*, **44**, 1281–1284.
- publCIF*: Westrip, S. P. (2010). *J. Appl. Cryst.*, **43**, 920–925.
- Sheldrick, G. M. (2008). *Acta Cryst.*, **A64**, 112–122.
- Sheldrick, G. M. (2012). *TWINABS*. Ver. 2012/1.
- Sheldrick, G. M. (2015). "Crystal structure refinement with *SHELXL*", *Acta Cryst.*, **C71**, 3–8.
- Sheldrick, G. M. (2015). "*SHELXT*—Integrated space-group and crystal-structure determination", *Acta Cryst.* **A71**, 3–8.
- Sheldrick, G. M. (2018). *SHELXL2018*. University of Göttingen, Germany.
- Spek, A. L. (2003). *J. Appl. Cryst.*, **36**, 7–13.

**Figure 1**



## supporting information

## Title

## Computing details

Data collection: Apex3 v2019.1-0 (Bruker, 2019); cell refinement: *SAINTE* V8.40A (Bruker, 2019); data reduction: *SAINTE* V8.40A (Bruker, 2019); program(s) used to solve structure: *SHELXS97* (Sheldrick, 2008); program(s) used to refine structure: *SHELXL2018/3* (Sheldrick, 2015, 2018), *SHELXLE* Rev1117 (Hübschle *et al.*, 2011).

## (G117d\_MSI\_TAZ\_0m)

## Crystal data

CN<sub>7</sub>C<sub>3</sub>H<sub>6</sub>N<sub>3</sub>O

$M_r = 210.19$

Monoclinic,  $P2_1/n$

$a = 8.4296$  (13) Å

$b = 5.5977$  (9) Å

$c = 19.058$  (3) Å

$\beta = 96.392$  (10)°

$V = 893.7$  (2) Å<sup>3</sup>

$Z = 4$

$F(000) = 432$

$D_x = 1.562$  Mg m<sup>-3</sup>

Cu  $K\alpha$  radiation,  $\lambda = 1.54178$  Å

Cell parameters from 719 reflections

$\theta = 5.5$ – $58.2$ °

$\mu = 1.07$  mm<sup>-1</sup>

$T = 150$  K

Needle, colourless

$0.15 \times 0.02 \times 0.01$  mm

## Data collection

Bruker AXS D8 Quest

diffractometer with PhotonIII\_C14 charge-integrating  
and photon counting pixel array detector

Radiation source: I-mu-S microsource X-ray tube

Laterally graded multilayer (Goebel) mirror

monochromator

Detector resolution: 7.4074 pixels mm<sup>-1</sup>

$\omega$  and  $\phi$  scans

Absorption correction: multi-scan

*SADABS* 2016/2: Krause, L., Herbst-Irmer, R.,  
Sheldrick G.M. & Stalke D., *J. Appl. Cryst.* 48 (2015)  
3-10

$T_{\min} = 0.502$ ,  $T_{\max} = 0.754$

7434 measured reflections

1744 independent reflections

735 reflections with  $I > 2\sigma(I)$

$R_{\text{int}} = 0.182$

$\theta_{\max} = 72.2$ °,  $\theta_{\min} = 5.5$ °

$h = -10 \rightarrow 10$

$k = -6 \rightarrow 6$

$l = -23 \rightarrow 22$

## Refinement

Refinement on  $F^2$

Least-squares matrix: full

$R[F^2 > 2\sigma(F^2)] = 0.092$

$wR(F^2) = 0.301$

$S = 0.97$

1744 reflections

137 parameters

0 restraints

Primary atom site location: structure-invariant direct  
methods

Secondary atom site location: difference Fourier map

Hydrogen site location: inferred from neighbouring  
sites

H-atom parameters constrained

$w = 1/[\sigma^2(F_o^2) + (0.1226P)^2]$

where  $P = (F_o^2 + 2F_c^2)/3$

$(\Delta/\sigma)_{\max} < 0.001$

$\Delta\rho_{\max} = 0.28$  e Å<sup>-3</sup>

$\Delta\rho_{\min} = -0.45$  e Å<sup>-3</sup>

*Special details*

*Geometry.* All e.s.d.'s (except the e.s.d. in the dihedral angle between two l.s. planes) are estimated using the full covariance matrix. The cell e.s.d.'s are taken into account individually in the estimation of e.s.d.'s in distances, angles and torsion angles; correlations between e.s.d.'s in cell parameters are only used when they are defined by crystal symmetry. An approximate (isotropic) treatment of cell e.s.d.'s is used for estimating e.s.d.'s involving l.s. planes.

*Fractional atomic coordinates and isotropic or equivalent isotropic displacement parameters ( $\text{\AA}^2$ )*

|     | <i>x</i>   | <i>y</i>    | <i>z</i>   | $U_{\text{iso}}^*/U_{\text{eq}}$ |
|-----|------------|-------------|------------|----------------------------------|
| O1  | 0.6899 (5) | 0.4107 (9)  | 0.5096 (2) | 0.0622 (12)                      |
| N1  | 0.6027 (5) | 0.3866 (10) | 0.6086 (2) | 0.0520 (12)                      |
| N2  | 0.5985 (6) | 0.2701 (10) | 0.5492 (3) | 0.0587 (14)                      |
| N3  | 0.8367 (6) | 0.7528 (10) | 0.5179 (3) | 0.0641 (15)                      |
| H3A | 0.857767   | 0.730234    | 0.474175   | 0.077*                           |
| H3B | 0.875772   | 0.878161    | 0.541741   | 0.077*                           |
| N4  | 1.0387 (6) | 0.7372 (10) | 0.2748 (3) | 0.0584 (14)                      |
| N5  | 1.1048 (6) | 0.9085 (11) | 0.3191 (3) | 0.0623 (15)                      |
| N6  | 1.0510 (6) | 0.8853 (11) | 0.3809 (3) | 0.0606 (14)                      |
| N7  | 0.9482 (6) | 0.7013 (10) | 0.3802 (3) | 0.0570 (14)                      |
| N8  | 0.8535 (6) | 0.4220 (10) | 0.2865 (3) | 0.0602 (14)                      |
| N9  | 0.7881 (6) | 0.3111 (11) | 0.3319 (3) | 0.0589 (14)                      |
| N10 | 0.7189 (7) | 0.1998 (11) | 0.3671 (3) | 0.0691 (16)                      |
| C1  | 0.7477 (7) | 0.6003 (13) | 0.5473 (3) | 0.0553 (15)                      |
| C2  | 0.6886 (7) | 0.5854 (12) | 0.6126 (3) | 0.0548 (15)                      |
| H2  | 0.705933   | 0.693206    | 0.651149   | 0.066*                           |
| C3  | 0.5200 (7) | 0.2786 (12) | 0.6649 (3) | 0.0612 (17)                      |
| H3C | 0.413256   | 0.226386    | 0.645225   | 0.092*                           |
| H3D | 0.510613   | 0.396753    | 0.702134   | 0.092*                           |
| H3E | 0.581078   | 0.140699    | 0.684732   | 0.092*                           |
| C4  | 0.9454 (7) | 0.6177 (13) | 0.3152 (3) | 0.0554 (15)                      |

*Atomic displacement parameters ( $\text{\AA}^2$ )*

|     | $U^{11}$  | $U^{22}$  | $U^{33}$  | $U^{12}$   | $U^{13}$    | $U^{23}$   |
|-----|-----------|-----------|-----------|------------|-------------|------------|
| O1  | 0.074 (3) | 0.065 (3) | 0.050 (2) | -0.012 (2) | 0.0158 (19) | -0.007 (2) |
| N1  | 0.054 (3) | 0.053 (3) | 0.050 (3) | -0.005 (2) | 0.012 (2)   | -0.001 (2) |
| N2  | 0.069 (3) | 0.056 (4) | 0.054 (3) | -0.006 (2) | 0.018 (2)   | -0.005 (2) |
| N3  | 0.079 (3) | 0.064 (4) | 0.052 (3) | -0.012 (3) | 0.022 (2)   | 0.002 (3)  |
| N4  | 0.059 (3) | 0.063 (4) | 0.054 (3) | -0.003 (2) | 0.010 (2)   | 0.002 (3)  |
| N5  | 0.064 (3) | 0.067 (4) | 0.057 (3) | -0.004 (3) | 0.012 (2)   | 0.004 (3)  |
| N6  | 0.066 (3) | 0.064 (4) | 0.053 (3) | -0.005 (3) | 0.013 (2)   | 0.000 (3)  |
| N7  | 0.063 (3) | 0.056 (3) | 0.054 (3) | -0.003 (2) | 0.015 (2)   | -0.003 (2) |
| N8  | 0.070 (3) | 0.062 (4) | 0.051 (3) | -0.008 (3) | 0.017 (2)   | -0.005 (3) |
| N9  | 0.063 (3) | 0.061 (4) | 0.053 (3) | -0.005 (3) | 0.009 (2)   | -0.005 (3) |
| N10 | 0.078 (4) | 0.061 (4) | 0.069 (3) | -0.014 (3) | 0.014 (3)   | -0.005 (3) |
| C1  | 0.056 (3) | 0.061 (4) | 0.049 (3) | -0.008 (3) | 0.010 (2)   | 0.000 (3)  |
| C2  | 0.061 (3) | 0.055 (4) | 0.050 (3) | -0.002 (3) | 0.011 (3)   | -0.002 (3) |
| C3  | 0.072 (4) | 0.055 (4) | 0.060 (4) | -0.005 (3) | 0.024 (3)   | 0.005 (3)  |
| C4  | 0.056 (3) | 0.062 (4) | 0.049 (3) | 0.006 (3)  | 0.010 (2)   | 0.000 (3)  |

## Geometric parameters (Å, °)

|             |            |             |            |
|-------------|------------|-------------|------------|
| O1—C1       | 1.343 (8)  | N6—N7       | 1.345 (7)  |
| O1—N2       | 1.382 (7)  | N7—C4       | 1.322 (8)  |
| N1—N2       | 1.304 (7)  | N8—N9       | 1.241 (7)  |
| N1—C2       | 1.325 (8)  | N8—C4       | 1.416 (8)  |
| N1—C3       | 1.472 (7)  | N9—N10      | 1.125 (8)  |
| N3—C1       | 1.304 (8)  | C1—C2       | 1.392 (8)  |
| N3—H3A      | 0.8800     | C2—H2       | 0.9500     |
| N3—H3B      | 0.8800     | C3—H3C      | 0.9800     |
| N4—C4       | 1.338 (8)  | C3—H3D      | 0.9800     |
| N4—N5       | 1.356 (7)  | C3—H3E      | 0.9800     |
| N5—N6       | 1.314 (7)  |             |            |
|             |            |             |            |
| C1—O1—N2    | 110.4 (4)  | N3—C1—C2    | 134.7 (6)  |
| N2—N1—C2    | 115.5 (5)  | O1—C1—C2    | 106.6 (5)  |
| N2—N1—C3    | 117.3 (5)  | N1—C2—C1    | 104.3 (5)  |
| C2—N1—C3    | 127.1 (5)  | N1—C2—H2    | 127.8      |
| N1—N2—O1    | 103.1 (4)  | C1—C2—H2    | 127.8      |
| C1—N3—H3A   | 120.0      | N1—C3—H3C   | 109.5      |
| C1—N3—H3B   | 120.0      | N1—C3—H3D   | 109.5      |
| H3A—N3—H3B  | 120.0      | H3C—C3—H3D  | 109.5      |
| C4—N4—N5    | 102.9 (5)  | N1—C3—H3E   | 109.5      |
| N6—N5—N4    | 109.2 (5)  | H3C—C3—H3E  | 109.5      |
| N5—N6—N7    | 110.7 (5)  | H3D—C3—H3E  | 109.5      |
| C4—N7—N6    | 103.0 (5)  | N7—C4—N4    | 114.3 (6)  |
| N9—N8—C4    | 112.6 (5)  | N7—C4—N8    | 126.0 (5)  |
| N10—N9—N8   | 172.6 (6)  | N4—C4—N8    | 119.8 (5)  |
| N3—C1—O1    | 118.6 (5)  |             |            |
|             |            |             |            |
| C2—N1—N2—O1 | -1.0 (7)   | C3—N1—C2—C1 | 176.6 (6)  |
| C3—N1—N2—O1 | -177.8 (5) | N3—C1—C2—N1 | 178.8 (7)  |
| C1—O1—N2—N1 | 1.5 (6)    | O1—C1—C2—N1 | 0.9 (6)    |
| C4—N4—N5—N6 | 0.0 (6)    | N6—N7—C4—N4 | -0.3 (7)   |
| N4—N5—N6—N7 | -0.2 (7)   | N6—N7—C4—N8 | -179.6 (6) |
| N5—N6—N7—C4 | 0.3 (7)    | N5—N4—C4—N7 | 0.2 (7)    |
| N2—O1—C1—N3 | -179.9 (5) | N5—N4—C4—N8 | 179.5 (5)  |
| N2—O1—C1—C2 | -1.6 (6)   | N9—N8—C4—N7 | -8.9 (9)   |
| N2—N1—C2—C1 | 0.0 (7)    | N9—N8—C4—N4 | 171.9 (6)  |

## Hydrogen-bond geometry (Å, °)

| <i>D</i> —H··· <i>A</i>    | <i>D</i> —H | H··· <i>A</i> | <i>D</i> ··· <i>A</i> | <i>D</i> —H··· <i>A</i> |
|----------------------------|-------------|---------------|-----------------------|-------------------------|
| N3—H3A···N6                | 0.88        | 2.69          | 3.417 (7)             | 141                     |
| N3—H3A···N7                | 0.88        | 2.03          | 2.898 (7)             | 169                     |
| N3—H3B···N6 <sup>i</sup>   | 0.88        | 2.03          | 2.883 (8)             | 164                     |
| C3—H3C···N10 <sup>ii</sup> | 0.98        | 2.63          | 3.365 (9)             | 132                     |
| C3—H3D···N4 <sup>iii</sup> | 0.98        | 2.47          | 3.419 (9)             | 163                     |
| C3—H3D···N5 <sup>iii</sup> | 0.98        | 2.53          | 3.429 (9)             | 153                     |
| C3—H3E···N5 <sup>iv</sup>  | 0.98        | 2.67          | 3.313 (8)             | 123                     |

Symmetry codes: (i)  $-x+2, -y+2, -z+1$ ; (ii)  $-x+1, -y, -z+1$ ; (iii)  $x-1/2, -y+3/2, z+1/2$ ; (iv)  $-x+2, -y+1, -z+1$ .

## Compound 8: 3-methyl-1,2,3-oxadiazolium nitrosoamide

### Compound 8

CCDC-2025852

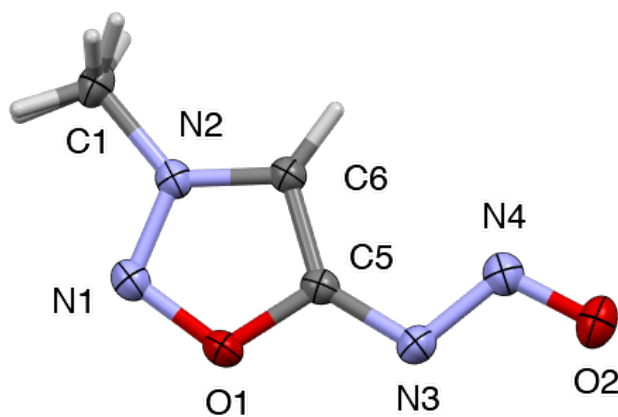

**Fig. 7** Molecular unit of 3-methyl-1,2,3-oxadiazolium nitrosoamide (**8**). Ellipsoids are drawn at the 50% probability level. Disorder of methyl H atoms is symmetry imposed by a mirror plane bisecting the molecule.

## Title

Matthias Zeller,\* Matthew Gettings and Davin Piercey

Department of Chemistry, Purdue University, 560 Oval Dr., W. Lafayette, IN 47907-2084, USA

Correspondence email: zeller4@purdue.edu

## Abstract

## Table 1

## Experimental details

|                                                                                                                |                                                                                                                                                                                                                               |
|----------------------------------------------------------------------------------------------------------------|-------------------------------------------------------------------------------------------------------------------------------------------------------------------------------------------------------------------------------|
| Crystal data                                                                                                   |                                                                                                                                                                                                                               |
| Chemical formula                                                                                               | C <sub>3</sub> H <sub>4</sub> N <sub>4</sub> O <sub>2</sub>                                                                                                                                                                   |
| <i>M</i> <sub>r</sub>                                                                                          | 128.10                                                                                                                                                                                                                        |
| Crystal system, space group                                                                                    | Orthorhombic, <i>Cmc</i> 2 <sub>1</sub>                                                                                                                                                                                       |
| Temperature (K)                                                                                                | 150                                                                                                                                                                                                                           |
| <i>a</i> , <i>b</i> , <i>c</i> (Å)                                                                             | 6.1158 (7), 9.1928 (9), 9.3984 (10)                                                                                                                                                                                           |
| <i>V</i> (Å <sup>3</sup> )                                                                                     | 528.39 (10)                                                                                                                                                                                                                   |
| <i>Z</i>                                                                                                       | 4                                                                                                                                                                                                                             |
| Radiation type                                                                                                 | Mo <i>K</i> α                                                                                                                                                                                                                 |
| μ (mm <sup>-1</sup> )                                                                                          | 0.14                                                                                                                                                                                                                          |
| Crystal size (mm)                                                                                              | 0.31 × 0.22 × 0.20                                                                                                                                                                                                            |
| Data collection                                                                                                |                                                                                                                                                                                                                               |
| Diffractionmeter                                                                                               | Bruker AXS D8 Quest<br>diffractometer with PhotonII charge-integrating pixel array detector (CPAD)                                                                                                                            |
| Absorption correction                                                                                          | Multi-scan<br><i>SADABS</i> 2016/2: Krause, L., Herbst-Irmer, R., Sheldrick G.M. & Stalke D., <i>J. Appl. Cryst.</i> 48 (2015) 3-10                                                                                           |
| <i>T</i> <sub>min</sub> , <i>T</i> <sub>max</sub>                                                              | 0.630, 0.747                                                                                                                                                                                                                  |
| No. of measured,<br>independent and<br>observed [ <i>I</i> > 2σ( <i>I</i> )<br>reflections                     | 4289, 1077, 989                                                                                                                                                                                                               |
| <i>R</i> <sub>int</sub>                                                                                        | 0.042                                                                                                                                                                                                                         |
| (sin θ/λ) <sub>max</sub> (Å <sup>-1</sup> )                                                                    | 0.770                                                                                                                                                                                                                         |
| Refinement                                                                                                     |                                                                                                                                                                                                                               |
| <i>R</i> [ <i>F</i> <sup>2</sup> > 2σ( <i>F</i> <sup>2</sup> )], <i>wR</i> ( <i>F</i> <sup>2</sup> ), <i>S</i> | 0.034, 0.091, 1.07                                                                                                                                                                                                            |
| No. of reflections                                                                                             | 1077                                                                                                                                                                                                                          |
| No. of parameters                                                                                              | 56                                                                                                                                                                                                                            |
| No. of restraints                                                                                              | 1                                                                                                                                                                                                                             |
| H-atom treatment                                                                                               | H-atom parameters constrained                                                                                                                                                                                                 |
| Δρ <sub>max</sub> , Δρ <sub>min</sub> (e Å <sup>-3</sup> )                                                     | 0.27, -0.22                                                                                                                                                                                                                   |
| Absolute structure                                                                                             | Flack <i>x</i> determined using 434 quotients [( <i>I</i> <sup>+</sup> )-( <i>I</i> <sup>-</sup> )]/[( <i>I</i> <sup>+</sup> )+( <i>I</i> <sup>-</sup> )] (Parsons, Flack and Wagner, <i>Acta Cryst.</i> B69 (2013) 249-259). |
| Absolute structure parameter                                                                                   | -0.1 (7)                                                                                                                                                                                                                      |

Computer programs: Apex3 v2019.1-0 (Bruker, 2019), *SAINTE* V8.40A (Bruker, 2019), *SHELXS*97 (Sheldrick, 2008), *SHELXL*2018/3 (Sheldrick, 2015, 2018), *SHELXL*E Rev1117 (Hübschle *et al.*, 2011).

**Table 2**

Hydrogen-bond geometry (Å, °)

| <i>D</i> —H··· <i>A</i>           | <i>D</i> —H | H··· <i>A</i> | <i>D</i> ··· <i>A</i> | <i>D</i> —H··· <i>A</i> |
|-----------------------------------|-------------|---------------|-----------------------|-------------------------|
| C1—H1 <i>B</i> ···O2 <sup>i</sup> | 0.98        | 2.51          | 3.458 (3)             | 162                     |
| C6—H6···N3 <sup>ii</sup>          | 0.95        | 2.32          | 3.269 (2)             | 179                     |

Symmetry codes: (i) *x*, *y*+1, *z*; (ii)  $-x$ ,  $-y+1$ ,  $z+1/2$ .**Acknowledgements**

This material is based upon work supported by the National Science Foundation through the Major Research Instrumentation Program under Grant No. CHE 1625543. (Funding for the single-crystal X-ray diffractometer).

**Funding information****References**

- Allen, F. H., Johnson, O., Shields, G. P., Smith, B. R. & Towler, M. (2004). *J. Appl. Cryst.*, **37**, 335–338.
- Bruker (2019). Apex3 v2019.1-0, *S SAINT* V8.40A, Bruker AXS Inc.: Madison (WI), USA, 2019.
- CSD: Groom, C. R. & Allen, F. H. (2014). *Angew. Chem. Int. Ed.*, **53**, 662–671.
- Hübschle, C. B., Sheldrick, G. M. & Dittrich, B. (2011). *J. Appl. Cryst.*, **44**, 1281–1284.
- publCIF*: Westrip, S. P. (2010). *J. Appl. Cryst.*, **43**, 920–925.
- Sheldrick, G. M. (2008). *Acta Cryst.*, **A64**, 112–122.
- Sheldrick, G. M. (2012). *TWINABS*. Ver. 2012/1.
- Sheldrick, G. M. (2015). "Crystal structure refinement with *SHELXL*", *Acta Cryst.*, **C71**, 3–8.
- Sheldrick, G. M. (2015). "*SHELXT*—Integrated space-group and crystal-structure determination", *Acta Cryst.* **A71**, 3–8.
- Sheldrick, G. M. (2018). *SHELXL2018*. University of Göttingen, Germany.
- Spek, A. L. (2003). *J. Appl. Cryst.*, **36**, 7–13.

**Figure 1**

## supporting information

### Title

#### Computing details

Data collection: Apex3 v2019.1-0 (Bruker, 2019); cell refinement: *SAINTE* V8.40A (Bruker, 2019); data reduction: *SAINTE* V8.40A (Bruker, 2019); program(s) used to solve structure: *SHELXS97* (Sheldrick, 2008); program(s) used to refine structure: *SHELXL2018/3* (Sheldrick, 2015, 2018), *SHELXLE* Rev1117 (Hübschle *et al.*, 2011).

#### (G117c3\_MSI\_NO2BF4\_0m)

##### Crystal data

|                                 |                                                         |
|---------------------------------|---------------------------------------------------------|
| $C_3H_4N_4O_2$                  | $D_x = 1.610 \text{ Mg m}^{-3}$                         |
| $M_r = 128.10$                  | Mo $K\alpha$ radiation, $\lambda = 0.71073 \text{ \AA}$ |
| Orthorhombic, $Cmc2_1$          | Cell parameters from 3960 reflections                   |
| $a = 6.1158 (7) \text{ \AA}$    | $\theta = 4.0\text{--}33.1^\circ$                       |
| $b = 9.1928 (9) \text{ \AA}$    | $\mu = 0.14 \text{ mm}^{-1}$                            |
| $c = 9.3984 (10) \text{ \AA}$   | $T = 150 \text{ K}$                                     |
| $V = 528.39 (10) \text{ \AA}^3$ | Block, yellow                                           |
| $Z = 4$                         | $0.31 \times 0.22 \times 0.20 \text{ mm}$               |
| $F(000) = 264$                  |                                                         |

##### Data collection

|                                                       |                                                              |
|-------------------------------------------------------|--------------------------------------------------------------|
| Bruker AXS D8 Quest                                   | Absorption correction: multi-scan                            |
| diffraction with PhotonII charge-integrating pixel    | <i>SADABS</i> 2016/2: Krause, L., Herbst-Irmer, R.,          |
| array detector (CPAD)                                 | Sheldrick G.M. & Stalke D., <i>J. Appl. Cryst.</i> 48 (2015) |
| Radiation source: fine focus sealed tube X-ray source | 3-10                                                         |
| Triumph curved graphite crystal monochromator         | $T_{\min} = 0.630$ , $T_{\max} = 0.747$                      |
| Detector resolution: $7.4074 \text{ pixels mm}^{-1}$  | 4289 measured reflections                                    |
| $\omega$ and phi scans                                | 1077 independent reflections                                 |
|                                                       | 989 reflections with $I > 2\sigma(I)$                        |
|                                                       | $R_{\text{int}} = 0.042$                                     |
|                                                       | $\theta_{\max} = 33.2^\circ$ , $\theta_{\min} = 4.0^\circ$   |
|                                                       | $h = -8 \rightarrow 9$                                       |
|                                                       | $k = -14 \rightarrow 14$                                     |
|                                                       | $l = -13 \rightarrow 14$                                     |

##### Refinement

|                                                                |                                                                                                             |
|----------------------------------------------------------------|-------------------------------------------------------------------------------------------------------------|
| Refinement on $F^2$                                            | Hydrogen site location: inferred from neighbouring sites                                                    |
| Least-squares matrix: full                                     | H-atom parameters constrained                                                                               |
| $R[F^2 > 2\sigma(F^2)] = 0.034$                                | $w = 1/[\sigma^2(F_o^2) + (0.0557P)^2]$                                                                     |
| $wR(F^2) = 0.091$                                              | where $P = (F_o^2 + 2F_c^2)/3$                                                                              |
| $S = 1.07$                                                     | $(\Delta/\sigma)_{\max} < 0.001$                                                                            |
| 1077 reflections                                               | $\Delta\rho_{\max} = 0.27 \text{ e \AA}^{-3}$                                                               |
| 56 parameters                                                  | $\Delta\rho_{\min} = -0.22 \text{ e \AA}^{-3}$                                                              |
| 1 restraint                                                    | Absolute structure: Flack x determined using 434                                                            |
| Primary atom site location: structure-invariant direct methods | quotients $[(I^+)-(I^-)]/[(I^+)+(I^-)]$ (Parsons, Flack and Wagner, <i>Acta Cryst.</i> B69 (2013) 249-259). |
| Secondary atom site location: difference Fourier map           | Absolute structure parameter: $-0.1 (7)$                                                                    |



*Special details*

*Geometry.* All e.s.d.'s (except the e.s.d. in the dihedral angle between two l.s. planes) are estimated using the full covariance matrix. The cell e.s.d.'s are taken into account individually in the estimation of e.s.d.'s in distances, angles and torsion angles; correlations between e.s.d.'s in cell parameters are only used when they are defined by crystal symmetry. An approximate (isotropic) treatment of cell e.s.d.'s is used for estimating e.s.d.'s involving l.s. planes.

*Fractional atomic coordinates and isotropic or equivalent isotropic displacement parameters ( $\text{\AA}^2$ )*

|     | <i>x</i>  | <i>y</i>     | <i>z</i>      | $U_{\text{iso}}^*/U_{\text{eq}}$ | Occ. (<1) |
|-----|-----------|--------------|---------------|----------------------------------|-----------|
| O1  | 0.000000  | 0.72558 (15) | -0.12018 (15) | 0.0265 (3)                       |           |
| O2  | 0.000000  | 0.25532 (16) | -0.0167 (2)   | 0.0333 (4)                       |           |
| N1  | 0.000000  | 0.85694 (18) | -0.05157 (17) | 0.0263 (4)                       |           |
| N2  | 0.000000  | 0.82298 (15) | 0.08329 (16)  | 0.0217 (3)                       |           |
| N3  | 0.000000  | 0.48009 (19) | -0.07896 (16) | 0.0259 (4)                       |           |
| N4  | 0.000000  | 0.38404 (18) | 0.0260 (2)    | 0.0267 (3)                       |           |
| C1  | 0.000000  | 0.9418 (2)   | 0.1867 (2)    | 0.0292 (4)                       |           |
| H1A | -0.144379 | 0.948728     | 0.231439      | 0.044*                           | 0.5       |
| H1B | 0.033664  | 1.033517     | 0.138201      | 0.044*                           | 0.5       |
| H1C | 0.110714  | 0.922947     | 0.259789      | 0.044*                           | 0.5       |
| C5  | 0.000000  | 0.6148 (2)   | -0.02386 (17) | 0.0212 (3)                       |           |
| C6  | 0.000000  | 0.67869 (18) | 0.10978 (19)  | 0.0216 (4)                       |           |
| H6  | 0.000000  | 0.631530     | 0.199718      | 0.026*                           |           |

*Atomic displacement parameters ( $\text{\AA}^2$ )*

|    | $U^{11}$   | $U^{22}$   | $U^{33}$    | $U^{12}$ | $U^{13}$ | $U^{23}$    |
|----|------------|------------|-------------|----------|----------|-------------|
| O1 | 0.0372 (8) | 0.0241 (6) | 0.0182 (6)  | 0.000    | 0.000    | 0.0030 (6)  |
| O2 | 0.0360 (8) | 0.0224 (7) | 0.0415 (9)  | 0.000    | 0.000    | -0.0040 (5) |
| N1 | 0.0326 (8) | 0.0231 (7) | 0.0231 (8)  | 0.000    | 0.000    | 0.0038 (6)  |
| N2 | 0.0241 (7) | 0.0197 (7) | 0.0212 (8)  | 0.000    | 0.000    | 0.0023 (6)  |
| N3 | 0.0350 (8) | 0.0211 (7) | 0.0217 (7)  | 0.000    | 0.000    | -0.0026 (6) |
| N4 | 0.0298 (7) | 0.0241 (7) | 0.0261 (7)  | 0.000    | 0.000    | 0.0014 (6)  |
| C1 | 0.0387 (9) | 0.0190 (7) | 0.0300 (10) | 0.000    | 0.000    | -0.0041 (7) |
| C5 | 0.0240 (7) | 0.0217 (7) | 0.0179 (7)  | 0.000    | 0.000    | 0.0008 (6)  |
| C6 | 0.0271 (8) | 0.0197 (8) | 0.0180 (8)  | 0.000    | 0.000    | 0.0008 (6)  |

*Geometric parameters ( $\text{\AA}$ ,  $^\circ$ )*

|          |             |                                       |            |
|----------|-------------|---------------------------------------|------------|
| O1—C5    | 1.363 (2)   | C1—H1A                                | 0.9800     |
| O1—N1    | 1.369 (2)   | C1—H1B                                | 0.9800     |
| O2—N4    | 1.250 (2)   | C1—H1C                                | 0.9800     |
| N1—N2    | 1.305 (2)   | C1—H1A <sup>i</sup>                   | 0.980 (13) |
| N2—C6    | 1.350 (2)   | C1—H1B <sup>i</sup>                   | 0.980 (10) |
| N2—C1    | 1.462 (2)   | C1—H1C <sup>i</sup>                   | 0.98 (2)   |
| N3—N4    | 1.324 (2)   | C5—C6                                 | 1.386 (3)  |
| N3—C5    | 1.342 (2)   | C6—H6                                 | 0.9500     |
| C5—O1—N1 | 110.26 (14) | N2—C1—H1B <sup>i</sup>                | 109.5 (2)  |
| N2—N1—O1 | 104.27 (14) | H1A—C1—H1B <sup>i</sup>               | 87.4       |
| N1—N2—C6 | 114.46 (15) | H1B—C1—H1B <sup>i</sup>               | 24.3       |
| N1—N2—C1 | 117.82 (15) | H1C—C1—H1B <sup>i</sup>               | 128.6      |
| C6—N2—C1 | 127.72 (16) | H1A <sup>i</sup> —C1—H1B <sup>i</sup> | 109.5      |

**Compound 8: 3-methyl-1,2,3-oxadiazolium nitrosoamide**  
supporting information

|                         |             |                                       |             |
|-------------------------|-------------|---------------------------------------|-------------|
| N4—N3—C5                | 109.13 (15) | N2—C1—H1C <sup>i</sup>                | 109.5 (5)   |
| O2—N4—N3                | 113.08 (19) | H1A—C1—H1C <sup>i</sup>               | 24.3        |
| N2—C1—H1A               | 109.5       | H1B—C1—H1C <sup>i</sup>               | 128.6       |
| N2—C1—H1B               | 109.5       | H1C—C1—H1C <sup>i</sup>               | 87.4        |
| H1A—C1—H1B              | 109.5       | H1A <sup>i</sup> —C1—H1C <sup>i</sup> | 109.5       |
| N2—C1—H1C               | 109.5       | H1B <sup>i</sup> —C1—H1C <sup>i</sup> | 109.5       |
| H1A—C1—H1C              | 109.5       | N3—C5—O1                              | 115.67 (16) |
| H1B—C1—H1C              | 109.5       | N3—C5—C6                              | 137.76 (18) |
| N2—C1—H1A <sup>i</sup>  | 109.5 (3)   | O1—C5—C6                              | 106.58 (15) |
| H1A—C1—H1A <sup>i</sup> | 128.6       | N2—C6—C5                              | 104.43 (16) |
| H1B—C1—H1A <sup>i</sup> | 87.4        | N2—C6—H6                              | 127.8       |
| H1C—C1—H1A <sup>i</sup> | 24.3        | C5—C6—H6                              | 127.8       |
|                         |             |                                       |             |
| C5—O1—N1—N2             | 0.000 (1)   | N1—O1—C5—N3                           | 180.000 (1) |
| O1—N1—N2—C6             | 0.000 (1)   | N1—O1—C5—C6                           | 0.000 (1)   |
| O1—N1—N2—C1             | 180.000 (1) | N1—N2—C6—C5                           | 0.000 (1)   |
| C5—N3—N4—O2             | 180.000 (1) | C1—N2—C6—C5                           | 180.000 (1) |
| N4—N3—C5—O1             | 180.000 (1) | N3—C5—C6—N2                           | 180.000 (1) |
| N4—N3—C5—C6             | 0.000 (1)   | O1—C5—C6—N2                           | 0.000 (1)   |

Symmetry code: (i)  $-x, y, z$ .

*Hydrogen-bond geometry* ( $\text{\AA}$ ,  $^\circ$ )

| <i>D</i> —H $\cdots$ <i>A</i>    | <i>D</i> —H | H $\cdots$ <i>A</i> | <i>D</i> $\cdots$ <i>A</i> | <i>D</i> —H $\cdots$ <i>A</i> |
|----------------------------------|-------------|---------------------|----------------------------|-------------------------------|
| C1—H1B $\cdots$ O2 <sup>ii</sup> | 0.98        | 2.51                | 3.458 (3)                  | 162                           |
| C6—H6 $\cdots$ N3 <sup>iii</sup> | 0.95        | 2.32                | 3.269 (2)                  | 179                           |

Symmetry codes: (ii)  $x, y+1, z$ ; (iii)  $-x, -y+1, z+1/2$ .
